# Supplementary material for: Association between domain-specific sedentary behaviour and endometrial cancer: a systematic review and meta-analysis
Source: PubMed Central journal article supplement — BMJ Open. 2023 Jun 6;13(6):e069042. doi: 10.1136/bmjopen-2022-069042 (PMC10254909; doi:10.1136/bmjopen-2022-069042), 2023-06-06
Supplement: bmjopen-2022-069042.draft_revisions.pdf [file bmjopen-2022-069042.draft_revisions.pdf]

# BMJ Open

BMJ Open is committed to open peer review. As part of this commitment we make the peer review history of every article we publish publicly available.

When an article is published we post the peer reviewers' comments and the authors' responses online. We also post the versions of the paper that were used during peer review. These are the versions that the peer review comments apply to.

The versions of the paper that follow are the versions that were submitted during the peer review process. They are not the versions of record or the final published versions. They should not be cited or distributed as the published version of this manuscript.

BMJ Open is an open access journal and the full, final, typeset and author-corrected version of record of the manuscript is available on our site with no access controls, subscription charges or pay-per-view fees (<http://bmjopen.bmj.com>).

If you have any questions on BMJ Open's open peer review process please email [info.bmjopen@bmj.com](mailto:info.bmjopen@bmj.com)

# BMJ Open

## The association between domain-specific sedentary behavior and endometrial cancer: A systematic review and meta-analysis

|                               |                                                                                                                                                                                                                                                                                                                                                                                                                                                                                                                                                                                                                                                                                                                                                                                                                                                                                                                                                                                                                                                                                                                                                                             |
|-------------------------------|-----------------------------------------------------------------------------------------------------------------------------------------------------------------------------------------------------------------------------------------------------------------------------------------------------------------------------------------------------------------------------------------------------------------------------------------------------------------------------------------------------------------------------------------------------------------------------------------------------------------------------------------------------------------------------------------------------------------------------------------------------------------------------------------------------------------------------------------------------------------------------------------------------------------------------------------------------------------------------------------------------------------------------------------------------------------------------------------------------------------------------------------------------------------------------|
| Journal:                      | <i>BMJ Open</i>                                                                                                                                                                                                                                                                                                                                                                                                                                                                                                                                                                                                                                                                                                                                                                                                                                                                                                                                                                                                                                                                                                                                                             |
| Manuscript ID                 | bmjopen-2022-069042                                                                                                                                                                                                                                                                                                                                                                                                                                                                                                                                                                                                                                                                                                                                                                                                                                                                                                                                                                                                                                                                                                                                                         |
| Article Type:                 | Original research                                                                                                                                                                                                                                                                                                                                                                                                                                                                                                                                                                                                                                                                                                                                                                                                                                                                                                                                                                                                                                                                                                                                                           |
| Date Submitted by the Author: | 13-Oct-2022                                                                                                                                                                                                                                                                                                                                                                                                                                                                                                                                                                                                                                                                                                                                                                                                                                                                                                                                                                                                                                                                                                                                                                 |
| Complete List of Authors:     | <p>Yuan, Lei ; Tongji University School of Medicine, Clinical Research Center, Shanghai First Maternity and Infant Hospital; The University of Tokyo, Department of Global Health Policy, Graduate School of Medicine<br/>           Ni, Jingyi; Tongji University School of Medicine, Clinical Research Center, Shanghai First Maternity and Infant Hospital<br/>           Lu, Wen; Tongji University School of Medicine, Division of Gynecologic Oncology, Department of Gynecology, Shanghai First Maternity and Infant Hospital<br/>           Yan, Qin; Tongji University School of Medicine, Division of Gynecologic Oncology, Department of Gynecology, Shanghai First Maternity and Infant Hospital<br/>           Wan, Xiaoping; Tongji University School of Medicine, Division of Gynecologic Oncology, Department of Gynecology, Shanghai First Maternity and Infant Hospital; Tongji University School of Medicine, Shanghai Key Laboratory of Maternal Fetal Medicine, Shanghai First Maternity and Infant Hospital<br/>           Li, Zhen; Tongji University School of Medicine, Clinical Research Center, Shanghai First Maternity and Infant Hospital</p> |
| Keywords:                     | Epidemiology < TROPICAL MEDICINE, Gynaecological oncology < GYNAECOLOGY, PUBLIC HEALTH                                                                                                                                                                                                                                                                                                                                                                                                                                                                                                                                                                                                                                                                                                                                                                                                                                                                                                                                                                                                                                                                                      |
|                               |                                                                                                                                                                                                                                                                                                                                                                                                                                                                                                                                                                                                                                                                                                                                                                                                                                                                                                                                                                                                                                                                                                                                                                             |

SCHOLARONE™  
Manuscripts

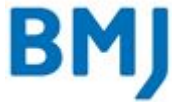

I, the Submitting Author has the right to grant and does grant on behalf of all authors of the Work (as defined in the below author licence), an exclusive licence and/or a non-exclusive licence for contributions from authors who are: i) UK Crown employees; ii) where BMJ has agreed a CC-BY licence shall apply, and/or iii) in accordance with the terms applicable for US Federal Government officers or employees acting as part of their official duties; on a worldwide, perpetual, irrevocable, royalty-free basis to BMJ Publishing Group Ltd ("BMJ") its licensees and where the relevant Journal is co-owned by BMJ to the co-owners of the Journal, to publish the Work in this journal and any other BMJ products and to exploit all rights, as set out in our [licence](#).

The Submitting Author accepts and understands that any supply made under these terms is made by BMJ to the Submitting Author unless you are acting as an employee on behalf of your employer or a postgraduate student of an affiliated institution which is paying any applicable article publishing charge ("APC") for Open Access articles. Where the Submitting Author wishes to make the Work available on an Open Access basis (and intends to pay the relevant APC), the terms of reuse of such Open Access shall be governed by a Creative Commons licence – details of these licences and which [Creative Commons](#) licence will apply to this Work are set out in our licence referred to above.

Other than as permitted in any relevant BMJ Author's Self Archiving Policies, I confirm this Work has not been accepted for publication elsewhere, is not being considered for publication elsewhere and does not duplicate material already published. I confirm all authors consent to publication of this Work and authorise the granting of this licence.

1           **The association between domain-specific sedentary behavior and**  
2           **endometrial cancer: A systematic review and meta-analysis**

3           Lei Yuan<sup>1,2</sup>, Jingyi Ni<sup>1</sup>, Wen Lu<sup>3</sup>, Qin Yan<sup>3</sup>, Xiaoping Wan<sup>3,4\*</sup>, Zhen Li<sup>1\*</sup>

4           <sup>1</sup>Clinical Research Center, Shanghai First Maternity and Infant Hospital, Tongji  
5           University School of Medicine, Shanghai, China.

6           <sup>2</sup>Department of Global Health Policy, Graduate School of Medicine, The University of  
7           Tokyo, Tokyo, Japan.

8           <sup>3</sup>Division of Gynecologic Oncology, Department of Gynecology, Shanghai First  
9           Maternity and Infant Hospital, Tongji University School of Medicine, Shanghai, China.

10          <sup>4</sup>Shanghai Key Laboratory of Maternal Fetal Medicine, Shanghai First Maternity and  
11          Infant Hospital, School of Medicine, Tongji University, Shanghai 200092, China

12  
13          **Correspondence to:** Xiaoping Wan, Division of Gynecologic Oncology, Department  
14          of Gynecology, Shanghai First Maternity and Infant Hospital, Tongji University School  
15          of Medicine, 2699 West Gaoke Road, Shanghai 201204, China. E-mail:  
16          wanxiaoping@tongji.edu.cn. or Zhen Li, Shanghai First Maternity and Infant Hospital,  
17          Tongji University School of Medicine, 2699 West Gaoke Road, Shanghai 201204,  
18          China. E-mail: [zhen\\_li@tongji.edu.cn](mailto:zhen_li@tongji.edu.cn).

19  
20          \*These authors are co-corresponding authors.

## 21 **Study Importance Questions**

### 22 **What is already known about this subject?**

- 23 1. High levels of sedentary behavior have detrimental effects on health.
- 24 2. Previous studies reported inconsistent association between sedentary behavior and
- 25 endometrial cancer.
- 26 3. There is supporting evidence for the differences in health effects of different domains
- 27 of sedentary behavior.
- 28 4. Potential interplay between lifestyle factors, such as obesity, physical activity and
- 29 sedentary behavior may modify the association between sedentary behaviour and health
- 30 outcomes.

### 32 **What are the new findings?**

- 33 1. 55% increased risk of endometrial cancer was observed among individuals with
- 34 higher levels of total sedentary behavior.
- 35 2. The results added to the existing evidence by showing a possible domain-specific
- 36 effect, particularly for occupational domain, and a borderline significant association
- 37 within leisure-time domain.
- 38 3. Subgroup-analyses suggested greater effect size in studies adjusting for physical
- 39 activity; yet adjustment for obesity indices may lead to a less pronounced risk estimate.

### 41 **How might your results change the direction of research or the focus of clinical**

### 42 **practice?**

43 In this review, we quantitatively assess the associations of domain-specific and total  
44 sedentary behavior with risk of endometrial cancer, with additional attention paid to  
45 potential differences in adjustment strategy for BMI and physical activity. Our findings  
46 highlight the importance of evaluating the interactive effects of sedentary behavior and  
47 other lifestyle factors (physical activity, obesity) while analyzing the association  
48 between sedentary behavior and endometrial cancer.

1  
2  
3 49 **Abstract**

50 **Methods** A Systematic review with meta-analysis was conducted by searching  
51 PubMed, Embase and MEDLINE databases up to 31 March 2021, supplemented by  
52 grey literature searches. The eligibility criteria was observational human studies  
53 evaluating the association between sedentary behavior and endometrial cancer.

54 **Results** Sixteen studies were included in the systematic review. Fourteen studies  
55 involving 882686 participants were included in the meta-analysis. The pooled RRs for  
56 high versus low level of sedentary behavior was 1.22 (95% CI 1.09-1.37,  $I^2=13.4%$ ,  
57  $n=10$ ) for occupational domain, 1.34 (95% CI 0.98-1.83,  $I^2=53.7%$ ,  $n=6$ ) for leisure-  
58 time domain, and 1.55 (95% CI 1.27-1.89,  $I^2=0%$ ,  $n=2$ ) for total sedentary behavior.  
59 Greater pooled RRs were observed among studies with adjustment for physical activity  
60 and without adjustment for BMI.

61 **Conclusions** Higher levels of sedentary behavior, total and occupational sedentary  
62 behavior in particular, increases the risk of endometrial cancer. Future studies are  
63 needed to investigate the interactive effects of physical activity, adiposity and sedentary  
64 time on endometrial cancer.

1  
2  
3 **65 Introduction** (*Manuscript word count: 4400*)  
4

5  
6 66 According to the updated global cancer burden estimates from *Global Cancer*  
7  
8 67 *Statistics 2020*,<sup>1</sup> endometrial cancer ranks the sixth most common cancer in women  
9  
10 68 worldwide, and the most common gynecologic cancer in several developed regions,  
11  
12 69 including the North America, Eastern and Northern Europe. A worrying trend is that,  
13  
14 70 since the late 1990s, the incidence of endometrial cancer has rapidly increased in  
15  
16 71 several developing countries during urbanization, including some Asian countries  
17  
18 72 (Japan, Singapore, China, the Philippines), and South Africa.<sup>2</sup> It is suggested that this  
19  
20 73 phenomenon may be explained, at least partly, by changing environmental and lifestyle  
21  
22 74 risk factors in these regions, such as the epidemic of obesity, lack of physical activity,  
23  
24 75 and long-time sitting. Although obesity is a known risk factor for endometrial cancer,  
25  
26 76 the association between sedentary behavior and endometrial cancer remains largely  
27  
28 77 unclear. Sedentary behavior includes sitting, reclining or lying behavior characterized  
29  
30 78 by low energy expenditure.<sup>3</sup> During the past decades, technological innovation has  
31  
32 79 influenced how people work and spend leisure-time, and has led to inevitably prolonged  
33  
34 80 sitting time, particularly for desk-based office work and screen-based recreation.  
35  
36 81 According to *the World Health Organization (WHO) Guidelines on Physical Activity*  
37  
38 82 *and Sedentary behavior (2020)*, long sedentary time is associated with various  
39  
40 83 deleterious health outcomes, including all-cause mortality, cardiovascular diseases,  
41  
42 84 obesity, and more recently total cancer morbidity.<sup>3</sup>  
43  
44  
45  
46  
47  
48

49 85 Two previous meta-analyses investigating the association between sedentary  
50  
51 86 behavior and multiple cancer risk,<sup>4 5</sup> both published in 2014, reported a 28% to 36%  
52  
53 87 increased risk of endometrial cancer among individuals with higher levels of sedentary  
54  
55 88 behavior by summarizing three and eight studies, respectively. During years after, a  
56  
57 89 number of studies have further been conducted. Recently, two prospective studies,<sup>6 7</sup>  
58  
59  
60

1  
2  
3 90 involving 951 cases among 28692 participants, have reported a insignificant association  
4  
5 91 between leisure-time sedentariness and a significant association between occupational  
6  
7 92 sedentary behavior and endometrial cancer risk. Given inconsistent results reported, an  
8  
9  
10 93 up-to-date review of current evidence is in urge need to clarify the association between  
11  
12 94 sedentary behavior and endometrial cancer risk.

13  
14  
15 95 No distinction in domains of sedentary behavior is a likely source of the  
16  
17 96 discrepancy in previous findings. The *WHO Guidelines 2020* has operationalized the  
18  
19 97 definition of sedentary behavior to further include self-reported sitting that can be  
20  
21 98 assessed in various domains (including leisure-time and occupational domain) and total  
22  
23 99 sedentary behavior. Meanwhile, the association with adverse health outcomes may  
24  
25  
26 100 differ in certain domains of sedentary behavior.<sup>3</sup> It is increasingly recognized that  
27  
28 101 confounding factors may vary greatly across domains of sedentary behavior, and  
29  
30 102 contribute to varied associations with health-related outcomes.<sup>8</sup> For example, while  
31  
32 103 occupational sedentary behavior is related to education and socioeconomic variables,  
33  
34 104 leisure-time sedentary behavior is likely linked to lifestyle factors such as diet and  
35  
36 105 obesity.<sup>9</sup> Moreover, these two domains are often inversely correlated to physical  
37  
38 106 activity. However, current evidence has been derived mostly from studies that have  
39  
40  
41 107 broadly categorized sedentary behavior according to the level of sitting time involved.<sup>5</sup>  
42  
43  
44 108 <sup>10</sup> Domain-specific analyses, taking account of variability in study characteristics, may  
45  
46 109 help to further clarify the investigated association and to refine the prevention strategy  
47  
48 110 of endometrial cancer.

49  
50  
51 111 Besides, the complex interplay within lifestyle factors, including obesity, physical  
52  
53 112 activity and sedentary behavior, needs to be taken into consideration in analysis.  
54  
55 113 Obesity is a known risk factor for endometrial cancer, with a clear dose-response  
56  
57 114 relationship (the higher the body mass index, the greater the risk), detailed documented  
58  
59  
60



1  
2  
3 115 by the International Agency for Research on Cancer (IARC) working group.<sup>11</sup> Given  
4  
5 116 that prolonged sitting is likely to be related with high BMI, obesity thus may be a  
6  
7 117 potential mediator linking sedentary behavior to cancer incidence. Under this  
8  
9 118 circumstance, studies adjusting for BMI as a confounding factor may attenuate the true  
10  
11 119 effects of sedentary behavior when evaluating its impacts on endometrial cancer. A few  
12  
13 120 studies have probably recognized this issue and provided results without and with  
14  
15 121 additional adjustment for BMI.<sup>12 13 14 15</sup> In addition, although less evidence presented,  
16  
17 122 similar concerns have been raised with regard to physical activity, which has potential  
18  
19 123 protective effect on cancer risk.

20  
21  
22  
23  
24 124 In this systematic review and meta-analysis, we aimed to quantitatively assess the  
25  
26 125 associations of domain-specific (occupational and leisure-time) and total sedentary  
27  
28 126 behavior with risk of endometrial cancer, with additional attention paid to potential  
29  
30 127 difference of the findings related to different adjustment strategy for BMI and physical  
31  
32 128 activity.

## 33 34 35 36 37 130 **Methods**

38  
39 131 We performed this systematic review and meta-analysis in accordance with the 2020  
40  
41 132 guidance of the Preferred Reporting Items for Systematic Reviews and Meta-Analyses  
42  
43 133 (PRISMA)<sup>16</sup> and guidelines of the Meta-analysis of Observational Studies in  
44  
45 134 Epidemiology (MOOSE) as well.<sup>17</sup> Reported items in this systematic review and meta-  
46  
47 135 analysis strictly followed the checklist of PRISMA 2020 and MOOSE ([Table S1, S2](#)).  
48  
49 136 The full review protocol was registered with International prospective register of  
50  
51 137 systematic reviews (PROSPERO) under the registration number CRD 42021246283.

## 52 53 54 55 56 57 58 139 **Search strategy and selection criteria**

59  
60 140 We conducted a comprehensive literature search of the electronic databases, including

1  
2  
3 141 Embase, MEDLINE and PubMed. The search was updated on 31 March 2021, and  
4  
5 142 publication language was limited to English. The search combined MeSH heading with  
6  
7 143 text search using varied terms related to “sedentary behavior” and “endometrial cancer”.  
8  
9  
10 144 Detailed search terms and strategy used are listed in the [Supplemental Text](#). Terms  
11  
12 145 associated with physical inactivity and physical activity were also searched since some  
13  
14 146 sedentary behavior studies were conducted in the name of physical activity. In addition,  
15  
16 147 we screened and manually checked references lists from selected articles and relevant  
17  
18 148 reviews to identify other potentially eligible studies.

19  
20  
21 149 The inclusion criteria for the studies included in the systematic review listed as  
22  
23 150 follows: (1) observational human study that published in English; (2) evaluated the  
24  
25 151 association between sedentary behavior (total sitting time, leisure-time sedentariness  
26  
27 152 including sitting, television or screen viewing, and occupational sedentary behavior)  
28  
29 153 and incidence of endometrial cancer. Apart from all criteria for systematic review, the  
30  
31 154 studies further included in the meta-analysis should also meet the following criteria:  
32  
33 155 report a relative risk (RR), odds ratio (OR), hazard ratio (HR) or standardized incidence  
34  
35 156 ratio (SIR) with 95% confidence interval (CI) for highest versus lowest level of  
36  
37 157 sedentary behavior, or provide sufficient data to calculate them.

38  
39  
40 158 Studies were excluded if they were published as conference abstracts or papers,  
41  
42 159 letters and short surveys. We also excluded studies for physical activity that used terms  
43  
44 160 “sedentary” or “sitting” to represent the lowest or reference level of physical activity  
45  
46 161 categories.

47  
48  
49  
50  
51 162

### 52 163 **Data extraction and quality assessment**

53  
54 164 Two authors (Lei Yuan and JingYi Ni) independently performed the literature search  
55  
56 165 and reviewed potential studies in compliance with the selection criteria. The  
57  
58  
59  
60

1  
2  
3 166 disagreements were resolved through discussion. The authors were contacted by e-mail  
4  
5 167 for full text or additional information when needed. Extracted information from each  
6  
7 168 study included: (a) name of the first author and publication year; (b) study design; (c)  
8  
9 169 study area; (d) enrollment period for cohort study, or study period for case-control study;  
10  
11 170 (e) age at baseline; (f) follow-up length for cohort study; (g) study population; (h)  
12  
13 171 sample size; (i) case number; (j) sedentary behavior type and its assessment; (k)  
14  
15 172 diagnostic criteria of EC, and if available, its specific cancer classification; (l) results  
16  
17 173 and if possible, reported risk estimates and their 95% CI; (m) adjusted covariates, if  
18  
19 174 possible, particular attention to adjustment for body mass index (BMI), and physical  
20  
21 175 activity.

22  
23  
24  
25  
26 176 In the main analysis, we prioritized risk estimates that were adjusted for physical  
27  
28 177 activity, and unadjusted for BMI in studies with a separate step of BMI adjustment, or  
29  
30 178 other adiposity-related factors when available, due to potential intermediate role of  
31  
32 179 obesity. If study populations overlapped between included studies, we selected the  
33  
34 180 article that contained the most comprehensive data.<sup>18 19</sup>

35  
36  
37 181 Quality assessment of the studies included in the meta-analysis was assessed based  
38  
39 182 on the validated Newcastle-Ottawa Scale (NOS) for observational studies,<sup>20</sup> where each  
40  
41 183 study was evaluated based on three categories: participant selection (four items, one  
42  
43 184 star for each item); comparability of study groups (one item, up to two stars); exposure  
44  
45 185 or outcome assessment (three items, one star for each item). Thus, a study can be  
46  
47 186 awarded up to a maximum of nine stars.<sup>20</sup> We used the comparability category of the  
48  
49 187 NOS to judge whether the crucial confounders had been adjusted, that is, the study can  
50  
51 188 be awarded one star for adjusting for age, two stars for also controlling for physical  
52  
53 189 activity. The quality of the study was classified as poor ( $\leq 4$  stars), fair (4-6 stars), and  
54  
55 190 good ( $\geq 7$  stars). We also extracted confounders adjusted by each study, and evaluated  
56  
57  
58  
59  
60

1  
2  
3 191 whether the study had adequate adjustment for potential confounders, that is,  
4  
5 192 adjustment for at least five of seven confounders: age; diabetes, blood glucose;  
6  
7 193 hypertension, blood pressure; age at menarche, menopausal status and age, parity;  
8  
9 194 smoking; oral use of contraceptives, use of hormone replacement therapy; and physical  
10  
11 195 activity.<sup>21</sup>  
12  
13  
14  
15  
16

### 17 197 **Statistical analysis**

18  
19 198 Given underlying methodological heterogeneity across studies including study design,  
20  
21 199 participants' characteristics, and adjusted confounders, random effects models were  
22  
23 200 applied to summarize domain-specific (occupational and leisure-time), and total RRs  
24  
25 201 and their 95% CIs for the highest level versus the lowest level of sedentary behavior,  
26  
27 202 regardless of whether statistically significant heterogeneity was found. The natural  
28  
29 203 logarithms of the study-specific RR and corresponding standard errors were calculated  
30  
31 204 using the inverse variance approach. Employing random effects models, the RR of each  
32  
33 205 study was weighted using random effects weights and was further combined to obtain  
34  
35 206 an overall estimate. When studies reported subgroup-specific results such as estimates  
36  
37 207 of different calendar periods, we fitted a fixed effects model to combine the separate  
38  
39 208 results to obtain the overall estimates for the main analysis.<sup>19</sup> For studies not using the  
40  
41 209 lowest category as the reference category of sedentary behavior,<sup>6 7 13 22 23</sup> we used the  
42  
43 210 method by Hamling to recalculate the estimates through changing the lowest category  
44  
45 211 as the reference category.<sup>24</sup> We used  $I^2$  statistics to test for heterogeneity between  
46  
47 212 included studies.  $I^2$  values of more than 25%, 50%, 75% were deemed to indicate low,  
48  
49 213 moderate and high level of significant heterogeneity, separately. Potential publication  
50  
51 214 bias was assessed by inspection of funnel plots, and further evaluated using Egger's  
52  
53 215 regression test as well as Begg's correlation test. Asymmetry in the funnel plots or  $p$   
54  
55  
56  
57  
58  
59  
60

1  
2  
3 216 value < 0.1 indicated publication bias.  
4

5 217 Subgroup analyses were performed according to study design (cohort study, case-  
6 control study), study area (Asia, Europe and North America), sample size ( $\geq 5000$ , and  
7 < 5000), number of cases ( $\geq 500$ , and < 500), study quality (good, fair, poor), and  
8 adjustment for potential confounding factors (adequate, not adequate). In addition,  
9 sedentary behavior, obesity and physical activity are lifestyle factors that are complexly  
10 associated and interacted. As obesity potentially mediate the association between  
11 sedentary behavior and endometrial cancer risk, in which case the adjustment for BMI  
12 would over adjust the association, we conducted subgroup analyses stratified by  
13 whether BMI was adjusted.<sup>21</sup> Similarly, we also conducted subgroup analyses by  
14 whether adjusting for physical activity.  
15  
16  
17  
18  
19  
20  
21  
22  
23  
24  
25  
26  
27

28 227 Associations with total sedentary behavior were reported in only two studies.  
29 Therefore, we also included all studies in the analysis to assess the effects of overall  
30 sedentary behavior. If a study reported results at a specific domain, we extracted the  
31 results as the nearest estimate for overall sedentariness. If a study reported results at  
32 multiple domains, we used fixed effects models to combine the separate results to  
33 obtain the overall estimates as the total level. Random-effects meta-regression analyses  
34 were then conducted to explore whether the estimates differed by main characteristics  
35 of the included study. The analyses were unavailable for domain-specific sedentary  
36 behavior analysis due to limited number of studies ( $n \leq 10$ ). The Tau-squared was used  
37 to evaluate between-study variance of each covariate.  
38  
39  
40  
41  
42  
43  
44  
45  
46  
47  
48  
49

50 236  
51 237 We also performed sensitivity analyses to test the robustness of the results in the  
52 main analysis. We firstly conducted analyses by omitting one study at each time to  
53 recalculate the pooled results to ensure the stability of the results. Secondly, we fitted  
54 the trim-and-fill analysis to inspect the impact of publication bias correction on the  
55  
56  
57  
58  
59  
60

1  
2  
3 241 pooled outcomes. The statistical analyses were performed using Stata 12.0 software  
4  
5 242 (Stata Corp, College Station, TX, USA). A two-tailed  $p$  value  $< 0.05$  was deemed  
6  
7 243 statistically significant.  
8  
9

10 244

## 11 245 **Patient and Public Involvement**

12  
13  
14 246 It's not applicable to our research since the data collected in this study is secondary data  
15  
16  
17 247 without any personal information and not transferable.  
18

19 248

## 20 249 **Results**

### 21 250 **Studies retrieved and characteristics**

22  
23  
24 251 Our initial search identified 749 records. After screening and selection ([Figure 1](#)),  
25  
26 252 sixteen studies were included in the systematic review of sedentary behavior and risk  
27  
28 253 of endometrial cancer. The main characteristics of the included studies are shown in  
29  
30 254 [Table 1](#). Of these sixteen studies, six were from Europe,<sup>6 13 18 19 23 25</sup> five from Asia,<sup>7 12</sup>  
31  
32 255 <sup>26 27 28</sup> and five from North America.<sup>14 15 22 29 30</sup> Detailed data and characteristics of study  
33  
34 256 participants, diagnostic criteria of the outcome, and the assessment of sedentary  
35  
36 257 behavior is provided in [Table S3, S4](#).  
37  
38  
39

40  
41 258 The meta-analysis included fourteen studies after excluding two studies, in which  
42  
43 259 one failed to provide 95% CI for risk estimates<sup>27</sup> and the other one was based on less  
44  
45 260 comprehensive data among overlapped study participants.<sup>18</sup> In total, 882686  
46  
47 261 participants from seven cohort studies and seven case-control studies were involved. In  
48  
49 262 the meta-analysis, two studies (71680 participants, [Table 1](#)) investigated the association  
50  
51 263 between total sedentary behavior and risk of endometrial cancer, ten studies (515163  
52  
53 264 participants) investigated the association with the assessment of occupational sedentary  
54  
55 265 behavior and six studies (458178 participants) with the assessment of leisure-time  
56  
57 266 sedentariness. Three studies (91984 participants) have adjusted for physical activity.  
58  
59  
60

1  
2  
3 267 Nine studies (321757 participants) have adjusted for BMI in the multivariate model,  
4  
5 268 and three studies (146746 participants) took a separate step for additional BMI  
6  
7 269 adjustment. Based on the Newcastle-Ottawa quality assessment scale, seven studies  
8  
9 270 were evaluated as having fair quality, and seven as having good quality. Detailed  
10  
11 271 information on the NOS quality assessment of meta-analysed studies is provided in  
12  
13 272 [Table S5, S6](#). Details of confounders adjusted by each study are presented in [Table S7](#).  
14  
15  
16

17 273

### 19 274 **Occupational sedentary behavior**

21 275 Twelve studies have investigated impacts of sedentary behavior during work on  
22  
23 276 endometrial cancer, and five of them reported significant association between  
24  
25 277 occupational sedentary behavior and increased risk of endometrial cancer,<sup>7 18 19 25 27</sup> the  
26  
27 278 rest did not observe similar significant effect.<sup>12 13 22 23 26 28 29</sup> Among these studies, the  
28  
29 279 meta-analysis for occupational domain included ten eligible studies, involving 515163  
30  
31 280 participants and 5855 cases. The summary RR for high versus low occupational  
32  
33 281 sedentary level was 1.22 (95% CI 1.09-1.37,  $I^2=13.4%$ ,  $P_{\text{heterogeneity}}=0.32$ ) ([Figure 2](#)).  
34  
35 282 Consistent with the inspection of the funnel plot, the results of Begg's test ( $P=0.72$ ) and  
36  
37 283 Egger's test ( $P=0.59$ ) suggested no publication bias ([Figure 5](#)).  
38  
39  
40  
41

42 284 The adverse effects of occupational sedentary behavior on endometrial cancer  
43  
44 285 incidence persisted in nearly all subgroup analyses stratified by study design, study area,  
45  
46 286 number of participants and cases, study quality, adjustment for confounders including  
47  
48 287 BMI, and physical activity ([Figure 2](#)). The association between occupational sedentary  
49  
50 288 behavior and endometrial cancer was stronger among studies that were cohort study  
51  
52 289 ( $RR_{\text{summary}}=1.30$ , 95% CI 1.05-1.62,  $I^2=37.2%$ ,  $P_{\text{heterogeneity}}=0.19$ ), studies conducted in  
53  
54 290 European areas ( $RR_{\text{summary}}=1.28$ , 95% CI 1.14-1.43,  $I^2=0.0%$ ,  $P_{\text{heterogeneity}}=0.41$ ), studies  
55  
56 291 with large number of participants ( $\geq 5000$ ;  $RR_{\text{summary}}=1.30$ , 95% CI 1.05-1.62,  
57  
58  
59  
60



1  
2  
3 292  $I^2=37.2\%$ ,  $P_{\text{heterogeneity}}=0.19$ ) or cases ( $\geq 500$ ;  $RR_{\text{summary}}=1.25$ , 95% CI 1.10-1.42,  
4  
5 293  $I^2=16.7\%$ ,  $P_{\text{heterogeneity}}=0.31$ ), and studies with good quality ( $RR_{\text{summary}}=1.25$ , 95% CI  
6  
7 294 1.01-1.56,  $I^2=35.4\%$ ,  $P_{\text{heterogeneity}}=0.19$ ). There was moderate heterogeneity in the  
8  
9 295 studies with adequate adjustment and with physical activity adjustment (adequate  
10  
11 296 adjustment for confounders:  $I^2=50.3\%$ ,  $P_{\text{heterogeneity}}=0.13$ ; adjustment for physical  
12  
13 297 activity:  $I^2=57.0\%$ ,  $P_{\text{heterogeneity}}=0.10$ ). Compared with studies without adequate  
14  
15 298 adjustment or physical activity adjustment, the associations observed in these two  
16  
17 299 groups were slightly attenuated, showing greater estimates and wider confidence  
18  
19 300 intervals. There was only one study adjusting for BMI separately,<sup>13</sup> and no significant  
20  
21 301 risk estimates were exhibited before and after adjustment (before adjustment:  $RR=1.03$ ,  
22  
23 302 95% CI 0.76-1.39; after adjustment:  $RR=0.99$ , 95% CI 0.73-1.34).

24  
25 303 The sensitivity analyses suggested that the association between occupational  
26  
27 304 sedentary behavior and endometrial cancer risk did not change when recalculating the  
28  
29 305 pooled estimates by omitting one study at a time (Table S8). After excluding the most  
30  
31 306 influential research, the summarized RR ranged from 1.19 (95% CI 1.04-1.37) when  
32  
33 307 excluding the study conducted by Moradi et al. to 1.27 (95% CI 1.15-1.40) when  
34  
35 308 excluding the study by Matthews et al.<sup>19 28</sup>

### 309 310 **Leisure-time sedentary behavior**

311 Six prospective cohort studies (458178 participants, 2396 cases) have assessed the  
312 relation with endometrial cancer and time spent sitting outside of work, including  
313 watching television (TV), videos or computer, reading, and other sedentary activity.  
314 Three of these studies found significant associations between leisure-time sedentary  
315 behavior and risk of endometrial cancer,<sup>13 14 15</sup> and the rest indicated non-significant  
316 associations.<sup>6 7 23</sup> The pooled RR for high versus low level of leisure-time sedentary



1  
2  
3 317 behavior was 1.34 (95% CI 0.98-1.83,  $I^2=53.7\%$ ,  $P=0.06$ ), with moderate and non-  
4  
5 318 significant heterogeneity (Figure 3). However, these results seemed to be driven by a  
6  
7 319 large study (253171 participants, 872 cases) that reported inconsistent results with other  
8  
9 320 studies ( $RR=0.57$ , 95% CI 0.31-1.03).<sup>6</sup> After excluding this study, no potential  
10  
11 321 heterogeneity remained in the analysis, and the summarized association between  
12  
13 322 leisure-time sedentary behavior and endometrial cancer turned out to be significant  
14  
15 323 ( $RR_{summary}=1.53$ , 95% CI 1.24-1.87,  $I^2=0.0\%$ ,  $P_{heterogeneity}=0.82$ ). No evidence of  
16  
17 324 publication bias was revealed according to visual inspection of the funnel plot, Begg's  
18  
19 325 test ( $P=0.85$ ), or Egger's test ( $P=0.78$ ) (Figure 5).

20  
21  
22  
23  
24 326 In subgroup analyses, the significance of the associations across the stratified  
25  
26 327 groups also appeared to be driven by the study reported by Hunter et al. Significant  
27  
28 328 positive associations were observed among studies in north America ( $RR_{summary}=1.48$ ,  
29  
30 329 95% CI 1.15-1.90,  $I^2=0.0\%$ ,  $P_{heterogeneity}=0.53$ ), studies with good quality  
31  
32 330 ( $RR_{summary}=1.53$ , 95% CI 1.24-1.87,  $I^2=0.0\%$ ,  $P_{heterogeneity}=0.82$ ), studies with small  
33  
34 331 number of cases ( $RR_{summary}=1.49$ , 95% CI 1.18-1.87,  $I^2=0.0\%$ ,  $P_{heterogeneity}=0.72$ ),  
35  
36 332 studies without adjustment for BMI ( $RR_{summary}=1.55$ , 95% CI 1.24-1.93,  $I^2=0.0\%$ ,  
37  
38 333  $P_{heterogeneity}=0.62$ ) and studies adjusted for physical activity ( $RR_{summary}=1.62$ , 95% CI  
39  
40 334 1.14-2.30,  $I^2=0.0\%$ ,  $P_{heterogeneity}=0.61$ ). In three studies with additional adjustment for  
41  
42 335 BMI, despite a decreased effect size, the association remained significant after adjusting  
43  
44 336 for BMI (before adjustment:  $RR_{summary}=1.55$ , 95% CI 1.24-1.93,  $I^2=0.0\%$ ,  
45  
46 337  $P_{heterogeneity}=0.62$ , versus, after adjustment:  $RR_{summary}=1.27$ , 95% CI 1.04-1.55,  $I^2=0.0\%$ ,  
47  
48 338  $P_{heterogeneity}=0.44$ )

49  
50  
51  
52  
53  
54 339 In sensitivity analyses, after excluding the most influential research, the summary  
55  
56 340 RRs ranged from 1.24 (95% CI 0.86-1.79) when excluding the study conducted by  
57  
58 341 Friberg et al. to 1.53 (95% CI 1.24-1.87) after excluding the study by Hunter et al.

1  
2  
3 342 (Table S8).<sup>6 13</sup>  
4  
5  
6 343  
7

8 344 **Total sedentary behavior**

9  
10 345 Two studies from the US, one large cohort study,<sup>15</sup> and one case-control study,<sup>30</sup>  
11  
12 346 including 71680 participants and 1317 cases in total, have investigated the effect of  
13  
14 347 total sedentary behavior (evaluated as total time spent sitting during a 24-hour day) on  
15  
16 348 endometrial cancer risk, and both proved significantly adverse effect. The pooled RR  
17  
18 349 for high versus low analysis of total sedentary behavior and endometrial cancer risk  
19  
20 350 was 1.55 (95% CI 1.27-1.89,  $I^2=0.0%$ ,  $P_{\text{heterogeneity}}=0.91$ ) (Figure 4). After combing all  
21  
22 351 included studies as evaluating overall sedentary behavior, the pooled RR for high versus  
23  
24 352 low analysis was 1.28 (95% CI 1.14-1.43,  $I^2=34.8%$ ,  $P_{\text{heterogeneity}}=0.10$ ) (Figure 4). No  
25  
26 353 evidence of publication bias was indicated through visual inspection of the funnel plot  
27  
28 354 (Figure 5), which was supported by Begg's test ( $P=0.38$ ), and Egger's test ( $P=0.29$ ).  
29  
30  
31  
32

33 355 The meta-regression analyses showed that all pre-specified study characteristics  
34  
35 356 explained little of the heterogeneity for overall sedentary behavior (Table S9). There  
36  
37 357 was weak evidence that associations were stronger for cohort study, study conducted in  
38  
39 358 North America, study with large sample size ( $n \geq 5000$ ), good quality and adequate  
40  
41 359 adjustment of confounding factors as well as adjustment for physical activity (Figure  
42  
43 360 4).  
44  
45  
46  
47  
48  
49  
50  
51  
52  
53  
54  
55  
56  
57  
58  
59  
60

## 361 Discussion

362 In this systematic review and comprehensive meta-analysis, 55% increased risk of  
363 endometrial cancer was observed among individuals with higher levels of total  
364 sedentary behavior, 22% among those with occupational sedentary behavior, and 34%  
365 with borderline significance among those with leisure-time sedentary behavior. The  
366 overall increased risk disregarding specific domains was 28%. The pooled associations  
367 were consistent within subgroups stratified according to study design, sample size, and  
368 adjustment strategy for physical activity and BMI.

369 The present results added to the existing evidence by showing a possible domain-  
370 specific association between sedentary behavior and endometrial cancer, particularly  
371 for total and occupational domain. Subgroup analyses were generally supportive of the  
372 overall estimates. Our results are partially in line with two previous meta-analyses that  
373 focused on effect of sedentary behavior on all-site cancers.<sup>4 5</sup> Including eight studies,  
374 Schmid et al.<sup>4</sup> reported a 36% increased risk of endometrial cancer among participants  
375 with higher levels of overall sedentary behavior. However, this research did not find a  
376 significant association for occupational domain, which could be attributed to the limited  
377 number of studies included (n=4) and their heterogeneous quality. Including three  
378 prospective studies, Shen et al.<sup>5</sup> reported a 66% increased risk of endometrial cancer  
379 for the defined sedentary behavior that was assessed by total sitting and TV viewing  
380 time. With limited number of studies included, this research did not discuss on potential  
381 heterogeneity of the studies. Our research found that the positive associations between  
382 sedentariness and endometrial cancer were more pronounced in studies with high  
383 quality, prospective design and large sample size. These studies were more prone to  
384 reveal the true association between sedentary behavior and endometrial cancer by  
385 reducing possibility of misclassification and selection, recall, and confounding bias.

1  
2  
3 386 While we found a significant increased risk of endometrial cancer related to higher  
4  
5 387 levels of occupational sedentary behavior, the results related to leisure-time sedentary  
6  
7 388 behavior was borderline significant. Possible explanations for domain-specific  
8  
9  
10 389 differences may be attributed to changes of sedentary behavior over time, susceptible  
11  
12 390 population, and exposure window across the life span.<sup>8</sup> Compared with leisure-time  
13  
14 391 sedentary behavior, occupational sedentary behavior is more frequently and closely  
15  
16 392 associated with stable biological accumulation of early-onset and long-term exposure  
17  
18 393 of prolonged, uninterrupted sitting.<sup>31</sup> Moreover, leisure-time sedentary behavior  
19  
20 394 interacts in a complex way with other lifestyle factors, such as diet, physical activity,  
21  
22 395 and obesity in association with health outcomes.<sup>9</sup> Failure to account for these factors in  
23  
24 396 research is likely to yield biased results. Besides, the domain-specific differences may  
25  
26 397 be explained, at least partly, by the small number as well as heterogeneity of studies  
27  
28 398 within leisure-time domain, in which the pooled estimates were dominated by a large-  
29  
30 399 sampled study with contrasting findings.<sup>6</sup> Further longitudinal studies incorporating the  
31  
32 400 measures of different domains are needed to better clarify the domain-specific  
33  
34 401 association and the difference across domains.

35  
36  
37  
38  
39 402 Subgroup-analyses suggested greater effect size in studies with adjustment for  
40  
41 403 physical activity. Emerging evidence has shown that the sedentary behavior is distinct  
42  
43 404 from lack of physical activity because of its unique postural and intervenable health  
44  
45 405 hazards effects that cannot be offset by physical activity.<sup>32</sup> Without proper adjustment  
46  
47 406 for physical activity, the real correlation between sedentary behavior and endometrial  
48  
49 407 cancer could be attenuated due to the role of physical activity in reducing cancer risk  
50  
51 408 by healthy body weight maintenance and obesity prevention.<sup>8 33</sup> However, most  
52  
53 409 included studies in the analysis did not adjust for physical activity. Our findings  
54  
55 410 highlight the importance of considering the interactive effects of sedentary behavior  
56  
57  
58  
59  
60

1  
2  
3 411 and other lifestyle factors may have on endometrial cancer in future studies. Novel  
4  
5 412 analytical method, such as marginal structural models with time-varying exposure  
6  
7 413 assessment, may be particularly important in evaluating the interactive effects of  
8  
9 414 sedentary behavior, physical activity and obesity in association with endometrial cancer,  
10  
11 415 as well as identifying critical exposure windows.<sup>36 37 38</sup>  
12  
13

14 416 It is widely hypothesized that sedentary behavior may increase the risk of cancers  
15  
16 417 due to low energy expenditure and by inducing obesity, a well-understood risk factor  
17  
18 418 for endometrial cancer.<sup>39</sup> Under this circumstance, adjusting for obesity indices (mostly  
19  
20 419 BMI) may lead to overadjustment of the association and produce a less pronounced risk  
21  
22 420 estimate. Realizing this issue, three studies included in the meta-analysis have reported  
23  
24 421 respective results with and without adjustment for BMI.<sup>13 14 15</sup> The pooled estimates of  
25  
26 422 these studies showed that the association between sedentary behavior and endometrial  
27  
28 423 cancer attenuated but remained significant after adjusting for BMI, suggesting that  
29  
30 424 other mechanisms distinct from obesity-related pathways likely exist.  
31  
32

33 425 The biological mechanisms by which sedentary behavior increases endometrial  
34  
35 426 cancer risk remains unclear. Several pathways related to metabolic abnormalities and  
36  
37 427 insulin sensitivity, chronic systemic inflammation, and endogenous sex hormones are  
38  
39 428 suggested as the main hypothesis linking physical activity, sedentary behavior and  
40  
41 429 obesity to cancer incidence.<sup>33 34 39</sup> Besides, long-time sitting posture might also  
42  
43 430 contribute through its adverse effect on mitochondrial and endothelial function.<sup>33</sup> Given  
44  
45 431 the complex mechanisms, further analysis may help better understand the potential  
46  
47 432 mechanisms through rating evidence separately among different study population,  
48  
49 433 particularly in non-obese and obese, pre-menopausal and post-menopausal women,  
50  
51 434 population with different intensity of physical activity, and for different histological  
52  
53 435 subtypes.<sup>36</sup>  
54  
55  
56  
57  
58  
59  
60

1  
2  
3 436 Strengths of this systematic review and meta-analysis include strictly following  
4  
5 437 the uniform criteria for study selection, quality evaluation and reporting. Also, our  
6  
7 438 meta-analysis included substantial numbers of participants and cancer cases, ensuring  
8  
9 439 sufficient statistical power to yield precise associations. Furthermore, our meta-analysis  
10  
11 440 revealed some novel insights not previously investigated, such as varied effects of  
12  
13 441 sedentary behavior on endometrial cancer across different domains. This is also the first  
14  
15 442 study taking the complex interaction between obesity, physical activity, and sedentary  
16  
17 443 behavior into account in the association. Additional merits include the robustness of the  
18  
19 444 pooled associations in multiple subgroups and sensitivity analyses within different  
20  
21 445 sedentary behavior domains.  
22  
23  
24  
25

26 446 There are some limitations in our review at the level of the meta-analysis and at  
27  
28 447 the level of included studies that need to be noticed. At the review level, we observed  
29  
30 448 evidence of heterogeneity between subgroups especially within leisure-time domain.  
31  
32 449 However, this seems to be mainly driven by one large-sampled study with contradicting  
33  
34 450 conclusion. After excluding the study, no more indication of heterogeneity was shown.  
35  
36 451 Also, the pooled associations showed little evidence of heterogeneity across different  
37  
38 452 domains of sedentary behavior and endometrial cancer. Secondly, small numbers of  
39  
40 453 studies included in our meta-analysis could lower the statistical power and limit the  
41  
42 454 ability to examine the existence of small study effects and excess significance bias.  
43  
44 455 Thirdly, it should be emphasized that there could be wide interindividual variation in  
45  
46 456 level of sedentary behavior, with all studies assessing self-reported levels of  
47  
48 457 sedentariness based on questionnaires, interviews, or job titles, and neither of these  
49  
50 458 studies applied repeated measures or corrected for measurement errors. Lastly,  
51  
52 459 definitions of high versus low levels of sedentary behavior varied greatly in the included  
53  
54 460 studies. For example, the highest level of sedentary behavior in some studies may vary  
55  
56  
57  
58  
59  
60

1  
2  
3 461 from more than 3 to 8 hours/day,<sup>6 30</sup> which may decrease the comparability among  
4  
5 462 studies. There is therefore an urgent need for the combination of self-report assessment,  
6  
7  
8 463 objective quantitative monitors in further prospective cohort studies, to study these  
9  
10 464 associations and improve understanding of benefits brought by reductions in sedentary  
11  
12 465 time.

13  
14  
15 466

### 17 467 **Conclusion**

18  
19 468 Higher levels of total and occupational sedentary behavior increase the risk of  
20  
21 469 endometrial cancer. The association between leisure-time sedentary behavior and  
22  
23 470 endometrial cancer is borderline significant. The interactive effects of physical activity,  
24  
25 471 obesity and sedentary behavior on endometrial cancer warrant further investigation.  
26  
27 472 Future longitudinal studies employing objective physical activity monitors may help to  
28  
29 473 clarify the quantitative association between total and domain-specific sedentary  
30  
31 474 behavior and endometrial cancer.  
32  
33  
34  
35  
36  
37  
38  
39  
40  
41  
42  
43  
44  
45  
46  
47  
48  
49  
50  
51  
52  
53  
54  
55  
56  
57  
58  
59  
60

1  
2  
3 **Declarations**  
4

5 **Ethics approval and consent to participate** Not applicable.  
6

7 **Consent for publication** Not applicable.  
8  
9

10 **Availability of data and materials** All data generated or analysed during this study  
11 are included in this published article and its supplementary information files.  
12  
13

14 **Competing interests** None declared.  
15

16 **Funding** This study is funded by the National Natural Science Foundation of China  
17 (grant number 81972438 to XW), two grants from the Shanghai Hospital Development  
18 Center (grant number SHDC12020107 to XW, SHDC2020CR5003 to XW). The  
19 funding bodies have not participated in the design of the study and collection, analysis,  
20 interpretation of data or in writing the manuscript.  
21  
22  
23  
24  
25  
26  
27

28 **Authors' contributions** The literature reviews were conducted by LY and JN. LY and  
29 ZL drafted the manuscript based on discussion involving all the authors, and  
30 contributed to the integrity of the data and statistical analysis. ZL and XW contributed  
31 to study concept and design, and critical revision of the manuscript and administrative  
32 support. WL, and QY supervised the study, critically reviewed the draft and approved  
33 the final version before submission.  
34  
35  
36  
37  
38  
39  
40  
41  
42  
43  
44  
45  
46  
47  
48  
49  
50  
51  
52  
53  
54  
55  
56  
57  
58  
59  
60



## Reference

- [1] Sung H, Ferlay J, Siegel RL, et al. Global cancer statistics 2020: GLOBOCAN estimates of incidence and mortality worldwide for 36 cancers in 185 countries. *CA Cancer J Clin*. 2021 Feb 4. doi: 10.3322/caac.21660. Epub ahead of print. PMID: 33538338.
- [2] Lortet-Tieulent J, Ferlay J, Bray F, et al. International Patterns and Trends in Endometrial Cancer Incidence, 1978-2013. *J Natl Cancer Inst*. 2018 Apr 1;110(4):354-361. doi: 10.1093/jnci/djx214.
- [3] WHO. WHO 2020 guidelines on physical activity and sedentary behavior. Geneva: World Health Organization, 2020. <https://apps.who.int/iris/bitstream/handle/10665/336656/9789240015128-eng.pdf> (accessed Nov 25, 2020).
- [4] Schmid D, Leitzmann MF. Television viewing and time spent sedentary in relation to cancer risk: a meta-analysis. *J Natl Cancer Inst*. 2014 Jun 16;106(7):dju098. doi: 10.1093/jnci/dju098.
- [5] Shen D, Mao W, Liu T, et al. Sedentary behavior and incident cancer: a meta-analysis of prospective studies. *PLoS One*. 2014 Aug 25;9(8):e105709. doi: 10.1371/journal.pone.0105709.
- [6] Hunter RF, Murray JM, Coleman HG. The association between recreational screen time and cancer risk: findings from the UK Biobank, a large prospective cohort study. *Int J Behav Nutr Phys Act*. 2020 Aug 3;17(1):97. doi: 10.1186/s12966-020-00997-6.
- [7] Miyata H, Shirai K, Muraki I, et al. Associations of body mass index, weight change, physical activity and sedentary behavior with endometrial cancer risk among Japanese women: The Japan Collaborative Cohort Study. *J Epidemiol*. 2020 Sep 19. doi: 10.2188/jea.JE20200145.
- [8] Mahmood S, MacInnis RJ, English DR, et al. Domain-specific physical activity and sedentary behavior in relation to colon and rectal cancer risk: a systematic review and meta-analysis. *Int J Epidemiol*. 2017 Dec 1;46(6):1797-1813. doi: 10.1093/ije/dyx137.
- [9] Hobbs M, Pearson N, Foster PJ, et al. Sedentary behavior and diet across the lifespan: an updated systematic review. *Br J Sports Med*. 2015 Sep;49(18):1179-88. doi: 10.1136/bjsports-2014-093754.
- [10] Jochem C, Wallmann-Sperlich B, Leitzmann MF. The Influence of Sedentary Behavior on Cancer Risk: Epidemiologic Evidence and Potential Molecular Mechanisms. *Curr Nutr Rep*. 2019 Sep;8(3):167-174. doi: 10.1007/s13668-019-0263-4.
- [11] Lauby-Secretan B, Scoccianti C, Loomis D, et al. International Agency for Research on Cancer Handbook Working Group. Body Fatness and Cancer--Viewpoint of the IARC Working Group. *N Engl J Med*. 2016 Aug 25;375(8):794-8. doi: 10.1056/NEJMSr1606602.
- [12] Shu XO, Hatch MC, Zheng W, et al. Physical activity and risk of endometrial cancer. *Epidemiology*. 1993 Jul;4(4):342-9. doi: 10.1097/00001648-199307000-00010.
- [13] Friberg E, Mantzoros CS, Wolk A. Physical activity and risk of endometrial cancer: a population-based prospective cohort study. *Cancer Epidemiol Biomarkers Prev*. 2006 Nov;15(11):2136-40. doi: 10.1158/1055-9965.
- [14] Patel AV, Feigelson HS, Talbot JT, et al. The role of body weight in the relationship between physical activity and endometrial cancer: results from a large cohort of US women. *Int J Cancer*. 2008 Oct 15;123(8):1877-82. doi: 10.1002/ijc.23716.
- [15] Gierach GL, Chang SC, Brinton LA, et al. Physical activity, sedentary behavior, and endometrial cancer risk in the NIH-AARP Diet and Health Study. *Int J Cancer*. 2009 May 1;124(9):2139-47. doi: 10.1002/ijc.24059.
- [16] Page MJ, McKenzie JE, Bossuyt PM, et al. The PRISMA 2020 statement: an updated guideline for reporting systematic reviews. *BMJ*. 2021 Mar 29;372:n71. doi: 10.1136/bmj.n71.
- [17] Stroup DF, Berlin JA, Morton SC, et al. Meta-analysis of observational studies in epidemiology: a proposal for reporting. Meta-analysis Of Observational Studies in Epidemiology (MOOSE) group. *JAMA*. 2000 Apr 19;283(15):2008-12. doi: 10.1001/jama.283.15.2008.

- 1  
2  
3 [18] Moradi T, Nyrén O, Bergström R, et al. Risk for endometrial cancer in relation to  
4 occupational physical activity: a nationwide cohort study in Sweden. *Int J Cancer*. 1998  
5 May 29;76(5):665-70. doi: 10.1002/(sici)1097-0215(19980529)76:5<665::aid-  
6 ijc9>3.0.co;2-o.
- 7 [19] Moradi T, Weiderpass E, Signorello LB, et al. Physical activity and postmenopausal  
8 endometrial cancer risk (Sweden). *Cancer Causes Control*. 2000 Oct;11(9):829-37. doi:  
9 10.1023/a:1008919717930.
- 10 [20] Wells GA, Shea B, O'Connell D, et al. The Newcastle-Ottawa Scale (NOS) for assessing  
11 the quality of nonrandomised studies in meta-analyses.  
12 [http://www.ohri.ca/programs/clinical\\_epidemiology/oxford.asp](http://www.ohri.ca/programs/clinical_epidemiology/oxford.asp) (accessed November 18  
13 2020).
- 14 [21] Cai X, Zhang Y, Li M, et al. Association between prediabetes and risk of all cause mortality  
15 and cardiovascular disease: updated meta-analysis. *BMJ*. 2020 Jul 15;370:m2297. doi:  
16 10.1136/bmj.m2297.
- 17 [22] Olson SH, Vena JE, Dorn JP, et al. Exercise, occupational activity, and risk of endometrial  
18 cancer. *Ann Epidemiol*. 1997 Jan;7(1):46-53. doi: 10.1016/s1047-2797(96)00071-3.
- 19 [23] Furberg AS, Thune I. Metabolic abnormalities (hypertension, hyperglycemia and  
20 overweight), lifestyle (high energy intake and physical inactivity) and endometrial cancer  
21 risk in a Norwegian cohort. *Int J Cancer*. 2003 May 10;104(6):669-76. doi:  
22 10.1002/ijc.10974. Erratum in: *Int J Cancer*. 2003 May 10;104(6):799.
- 23 [24] Hamling J, Lee P, Weitkunat R, et al. Facilitating meta-analyses by deriving relative effect  
24 and precision estimates for alternative comparisons from a set of estimates presented by  
25 exposure level or disease category. *Stat Med*. 2008 Mar 30;27(7):954-70. doi:  
26 10.1002/sim.3013.
- 27 [25] Weiderpass E, Pukkala E, Vasama-Neuvonen K, et al. Occupational exposures and cancers  
28 of the endometrium and cervix uteri in Finland. *Am J Ind Med*. 2001 Jun;39(6):572-80.  
29 doi: 10.1002/ajim.1056.
- 30 [26] Dosemeci M, Hayes RB, Vetter R, et al. Occupational physical activity, socioeconomic  
31 status, and risks of 15 cancer sites in Turkey. *Cancer Causes Control*. 1993 Jul;4(4):313-  
32 21. doi: 10.1007/BF00051333.
- 33 [27] Zheng W, Shu XO, McLaughlin JK, et al. Occupational physical activity and the incidence  
34 of cancer of the breast, corpus uteri, and ovary in Shanghai. *Cancer*. 1993 Jun  
35 1;71(11):3620-4. doi: 10.1002/1097-0142(19930601)71:11<3620::aid-  
36 cncr2820711125>3.0.co;2-s.
- 37 [28] Matthews CE, Xu WH, Zheng W, et al. Physical activity and risk of endometrial cancer: a  
38 report from the Shanghai endometrial cancer study. *Cancer Epidemiol Biomarkers Prev*.  
39 2005 Apr;14(4):779-85. doi: 10.1158/1055-9965.EPI-04-0665.
- 40 [29] Friedenreich CM, Cook LS, Magliocco AM, et al. Case-control study of lifetime total  
41 physical activity and endometrial cancer risk. *Cancer Causes Control*. 2010  
42 Jul;21(7):1105-16. doi: 10.1007/s10552-010-9538-1.
- 43 [30] Arem H, Irwin ML, Zhou Y, et al. Physical activity and endometrial cancer in a population-  
44 based case-control study. *Cancer Causes Control*. 2011 Feb;22(2):219-26. doi:  
45 10.1007/s10552-010-9689-0.
- 46 [31] Gilchrist SC, Howard VJ, Akinyemiju T, et al. Association of Sedentary behavior With  
47 Cancer Mortality in Middle-aged and Older US Adults. *JAMA Oncol*. 2020 Aug  
48 1;6(8):1210-1217. doi: 10.1001/jamaoncol.2020.2045.
- 49 [32] Lavie CJ, Ozemek C, Carbone S, et al. Sedentary behavior, Exercise, and Cardiovascular  
50 Health. *Circ Res*. 2019 Mar;124(5):799-815. doi: 10.1161/CIRCRESAHA.118.312669.
- 51 [33] Kerr J, Anderson C, Lippman SM. Physical activity, sedentary behavior, diet, and cancer:  
52 an update and emerging new evidence. *Lancet Oncol*. 2017 Aug;18(8):e457-e471. doi:  
53 10.1016/S1470-2045(17)30411-4.
- 54 [34] Friedenreich CM, Ryder-Burbidge C, McNeil J. Physical activity, obesity and sedentary  
55 behavior in cancer etiology: epidemiologic evidence and biologic mechanisms. *Mol Oncol*.  
56 2021 Mar;15(3):790-800. doi: 10.1002/1878-0261.12772.
- 57  
58  
59  
60

- 1  
2  
3 [35] Hibler E. Epigenetics and Colorectal Neoplasia: the Evidence for Physical Activity and  
4 Sedentary behavior. *Curr Colorectal Cancer Rep.* 2015 Dec;11(6):388-396. doi:  
5 10.1007/s11888-015-0296-z.  
6 [36] Kalliala I, Markozannes G, Gunter MJ, et al. Obesity and gynaecological and obstetric  
7 conditions: umbrella review of the literature. *BMJ.* 2017 Oct 26;359:j4511. doi:  
8 10.1136/bmj.j4511.  
9 [37] Bodnar LM, Davidian M, Siega-Riz AM, et al. Marginal structural models for analyzing  
10 causal effects of time-dependent treatments: an application in perinatal epidemiology. *Am*  
11 *J Epidemiol.* 2004 May 15;159(10):926-34. doi: 10.1093/aje/kwh131.  
12 [38] Mansournia MA, Etminan M, Danaei G, et al. Handling time varying confounding in  
13 observational research. *BMJ.* 2017 Oct 16;359:j4587. doi: 10.1136/bmj.j4587.  
14 [39] Wiseman AJ, Lynch BM, Cameron AJ, et al. Associations of change in television viewing  
15 time with biomarkers of postmenopausal breast cancer risk: the Australian Diabetes,  
16 Obesity and Lifestyle Study. *Cancer Causes Control.* 2014 Oct;25(10):1309-19. doi:  
17 10.1007/s10552-014-0433-z.  
18  
19  
20  
21  
22  
23  
24  
25  
26  
27  
28  
29  
30  
31  
32  
33  
34  
35  
36  
37  
38  
39  
40  
41  
42  
43  
44  
45  
46  
47  
48  
49  
50  
51  
52  
53  
54  
55  
56  
57  
58  
59  
60

**Table 1.** Study characteristics of the included studies in systematic review.

| Publication                            | Study design          | Study area | Enrolment / Study period      | Age at baseline (years) | Follow-up period | Number participants (controls)/cases                                                                                       | of Sedentary behavior                            | Results                                                                                                                          | NOS study quality |
|----------------------------------------|-----------------------|------------|-------------------------------|-------------------------|------------------|----------------------------------------------------------------------------------------------------------------------------|--------------------------------------------------|----------------------------------------------------------------------------------------------------------------------------------|-------------------|
| Dosemeci et al. (1993) <sup>26</sup>   | Case-control study    | Turkey     | 1979-1984                     | —                       | —                | 275/31                                                                                                                     | Occupational sedentary                           | OR (sedentary > 6 hr/d) = 0.50 (0.10, 4.40)                                                                                      | Fair (6)          |
| Shu et al. (1993) <sup>12</sup>        | Case-control study    | China      | 1988-1990                     | 18-74                   | —                | 536/268                                                                                                                    | Occupational sedentary                           | OR = 1.20 (0.70, 2.00)                                                                                                           | Fair (5)          |
| Zheng et al. (1993) <sup>27*</sup>     | Cross-sectional study | China      | 1980-1984                     | ≥ 30                    | —                | 452/452                                                                                                                    | Occupational sedentary                           | SIR (long sitting time) = 110                                                                                                    | —                 |
| Olson et al. (1997) <sup>22</sup>      | Case-control study    | US         | 1986-1991                     | 40-85                   | —                | 631/232                                                                                                                    | Occupational sedentary                           | OR = 0.93 (0.55, 1.56)                                                                                                           | Good (7)          |
| Moradi et al. (1998) <sup>18*</sup>    | Cohort study          | Sweden     | 1960<br>1970<br>1960 and 1970 | 16-95                   | 1971-1989        | Sub-cohort A (1960):<br>704904/4462<br>Sub-cohort B (1970):<br>982270/5287<br>Sub-cohort C (1960 and 1970):<br>253336/1949 | Occupational sedentary                           | RR (1960) = 1.13 (0.99, 1.29)<br>RR (1970) = 1.32 (1.17, 1.50)<br>RR (1960 and 1970) = 1.30 (1.03, 1.65)                         | —                 |
| Moradi et al. (2000) <sup>19</sup>     | Case-control study    | Sweden     | 1994-1995                     | 50-74                   | —                | 3368/709                                                                                                                   | Occupational sedentary                           | OR (1960) = 1.30 (0.80, 2.20)<br>OR (1970) = 1.20 (0.80, 1.90)<br>OR (1980) = 1.40 (1.00, 1.90)<br>OR (1990) = 1.30 (0.90, 1.90) | Good (7)          |
| Weiderpass et al. (2001) <sup>25</sup> | Cohort study          | Finland    | 1970                          | 25-64                   | 1971-1995        | 413877/2833                                                                                                                | Occupational sedentary                           | RR (high level of sedentary work) = 1.30 (1.10, 1.50)                                                                            | Fair (5)          |
| Furberg et al. (2003) <sup>23</sup>    | Cohort study          | Norway     | 1974-1981                     | 20-49                   | 1981-1996        | 24460/130                                                                                                                  | Leisure-time sedentary<br>Occupational sedentary | RR (Grade1-sedentary activity) = 1.27 (0.69, 2.32)<br>RR (Grade1-sedentary work) = 1.64 (0.95, 2.84)                             | Good (9)          |
| Matthews et al. (2005) <sup>28</sup>   | Case-control study    | China      | 1997-2001                     | 30-69                   | —                | 846/832                                                                                                                    | Occupational sedentary                           | OR (Sitting Q4) = 0.93 (0.67, 1.30)                                                                                              | Fair (5)          |

**Table 1.** Study characteristics of the included studies in systematic review (Continued).

| Publication                              | Study design       | Study area | Enrolment / Study period | Age at baseline (years)     | Follow-up period | Number of participants (controls)/cases | Sedentary behavior     | Results                                                                                                                                                                        | NOS study quality |
|------------------------------------------|--------------------|------------|--------------------------|-----------------------------|------------------|-----------------------------------------|------------------------|--------------------------------------------------------------------------------------------------------------------------------------------------------------------------------|-------------------|
| Friberg et al. (2006) <sup>13</sup>      | Cohort study       | Sweden     | 1997                     | 50-83                       | 1997-2005        | 33723/199                               | Occupational sedentary | RR (work/occupation activity, low, mostly sitting down and sitting down more than half of the time) = 1.03 (0.76, 1.39); Additional adjustment for BMI: RR = 0.99 (0.73, 1.34) | Good (8)          |
|                                          |                    |            |                          |                             |                  |                                         | Leisure-time sedentary | RR (watching TV/sitting, high, ≥5hr/d) = 1.80 (1.14, 2.83); Additional adjustment for BMI: RR = 1.66 (1.05, 2.61)                                                              |                   |
| Patel et al. (2008) <sup>14</sup>        | Cohort study       | US         | 1992                     | 50-74                       | 1997-2003        | 42672/466                               | Leisure-time sedentary | RR (sitting ≥6 hr/day) = 1.40 (1.03, 1.89); Additional adjustment for BMI: RR = 1.18 (0.87, 1.59)                                                                              | Good (7)          |
| Gierach et al. (2009) <sup>15</sup>      | Cohort study       | US         | 1995-1996                | 50-71                       | 1995-2003        | 70351/650                               | Leisure-time sedentary | RR (≥ 7 hr) = 1.66 (1.20, 2.88); Additional adjustment for BMI: RR = 1.21 (0.87, 1.67)                                                                                         | Good (7)          |
|                                          |                    |            |                          |                             |                  |                                         | Total sedentary        | RR (≥ 7 hr) = 1.56 (1.22, 1.99); Additional adjustment for BMI: RR = 1.26 (0.99, 1.62)                                                                                         |                   |
| Friedenreich et al. (2010) <sup>29</sup> | Case-control study | Canada     | 2002-2006                | 30-79                       | —                | 1032/542                                | Occupational sedentary | OR (Lifetime occupational sedentary activity, > 16.94 hr/wk/yr) = 1.28 (0.89, 1.83)                                                                                            | Fair (6)          |
| Arem et al. (2011) <sup>30</sup>         | Case-control study | US         | 2004-2008                | cases: 61.1; controls: 62.1 | —                | 662/667                                 | Total sedentary        | OR (≥ 8 hr/d) = 1.52 (1.07, 2.16)                                                                                                                                              | Fair (5)          |
| Hunter et al. (2020) <sup>6</sup>        | Cohort study       | UK         | 2006-2010                | 40-69                       | 7.6 (1.4) years  | 253171/872                              | Leisure-time sedentary | HR (daily TV viewing time, > 5h) = 0.59 (0.40, 0.88)<br>HR (daily computer use time, > 3h) = 0.82 (0.55, 1.22)<br>HR (daily total screen time, > 8h) = 0.57 (0.31, 1.03)       | Fair (6)          |
| Miyata et al. (2020) <sup>7</sup>        | Cohort study       | Japan      | 1988-1990                | 40-79                       | 14.8 years       | 33801/79                                | Leisure-time sedentary | HR (TV viewing, ≥ 4hr/d) = 2.10 (0.57, 7.71)                                                                                                                                   | Good (8)          |
|                                          |                    |            |                          |                             |                  |                                         | Occupational sedentary | HR (Occupational activity, mainly sitting) = 2.17 (1.04, 4.56)                                                                                                                 |                   |

\*Not included in the meta-analysis and NOS study quality assessment; Table values are mean (SD) for continuous variables.

## Figure legends

### Figure 1. PRISMA 2020 flow diagram of literature search and selection.

From: Page MJ, McKenzie JE, Bossuyt PM, Boutron I, Hoffmann TC, Mulrow CD, et al. The PRISMA 2020 statement: an updated guideline for reporting systematic reviews. *BMJ* 2021;372:n71. doi: 10.1136/bmj.n71. For more information, visit: <http://www.prisma-statement.org/>

### Figure 2. Pooled association between occupational sedentary behavior and endometrial cancer.

Note:  $I^2$  for heterogeneity between studies;  $P$  value for heterogeneity in subgroups; NA: not applicable. Adequate adjustment denotes adjustment for at least five of seven confounders: age; diabetes, blood glucose; hypertension, blood pressure; age at menarche, menopausal status and age, parity; smoking; oral use of contraceptives, use of hormone replacement therapy; and physical activity. Adjustment for BMI denotes adjustment for BMI in the multivariate model.

### Figure 3. Pooled association between leisure-time sedentary behavior and endometrial cancer.

Note:  $I^2$  for heterogeneity between studies;  $P$  value for heterogeneity in subgroups; NA: not applicable. Adequate adjustment denotes adjustment for at least five of seven confounders: age; diabetes, blood glucose; hypertension, blood pressure; age at menarche, menopausal status and age, parity; smoking; oral use of contraceptives, use of hormone replacement therapy; and physical activity. Adjustment for BMI denotes adjustment for BMI in the multivariate model.

### Figure 4. Pooled association between total sedentary behavior and endometrial cancer.

Note:  $I^2$  for heterogeneity between studies;  $P$  value for heterogeneity in subgroups; NA: not applicable. Adequate adjustment denotes adjustment for at least five of seven confounders: age; diabetes, blood glucose; hypertension, blood pressure; age at menarche, menopausal status and age, parity; smoking; oral use of contraceptives, use of hormone replacement therapy; and physical activity. Adjustment for BMI denotes adjustment for BMI in the multivariate model.

### Figure 5. Funnel plot of overall sedentary behavior and endometrial cancer.



PRISMA 2020 flow diagram for new systematic reviews which included searches of databases, registers and other sources

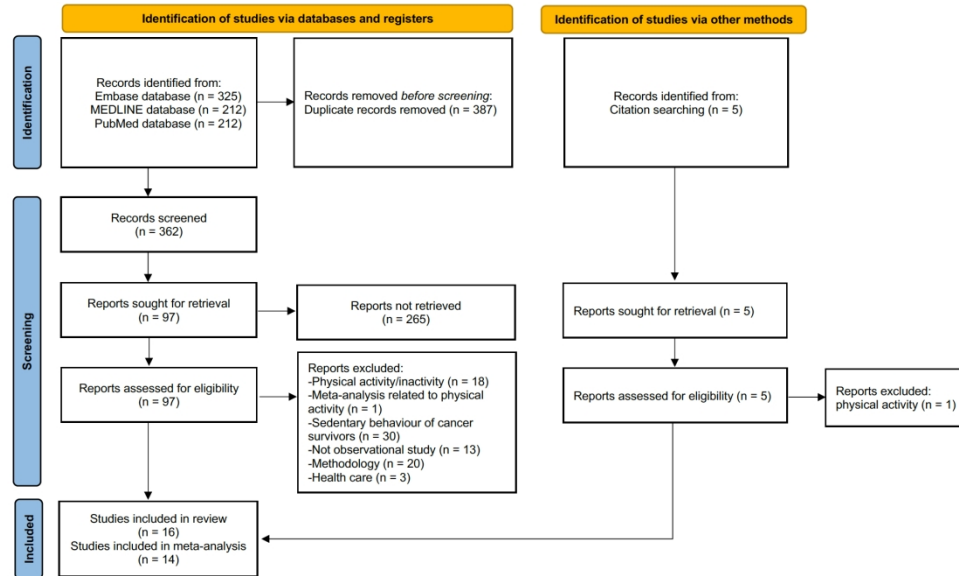

Figure 1. PRISMA 2020 flow diagram of literature search and selection. From: Page MJ, McKenzie JE, Bossuyt PM, Boutron I, Hoffmann TC, Mulrow CD, et al. The PRISMA 2020 statement: an updated guideline for reporting systematic reviews. *BMJ* 2021;372:n71. doi: 10.1136/bmj.n71. For more information, visit: <http://www.prisma-statement.org/>

368x232mm (144 x 144 DPI)

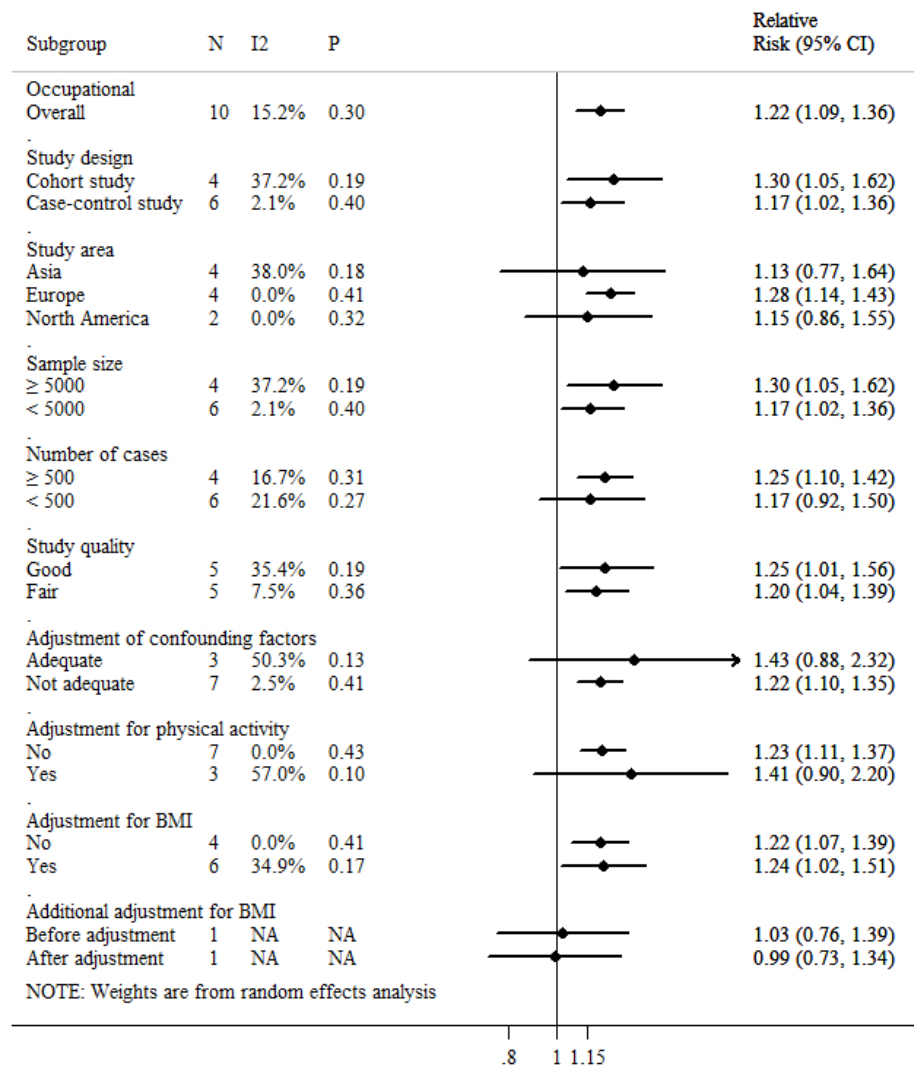

Figure 2. Pooled association between occupational sedentary behavior and endometrial cancer. Note: I2 for heterogeneity between studies; P value for heterogeneity in subgroups; NA: not applicable. Adequate adjustment denotes adjustment for at least five of seven confounders: age; diabetes, blood glucose; hypertension, blood pressure; age at menarche, menopausal status and age, parity; smoking; oral use of contraceptives, use of hormone replacement therapy; and physical activity. Adjustment for BMI denotes adjustment for BMI in the multivariate model.

241x277mm (72 x 72 DPI)



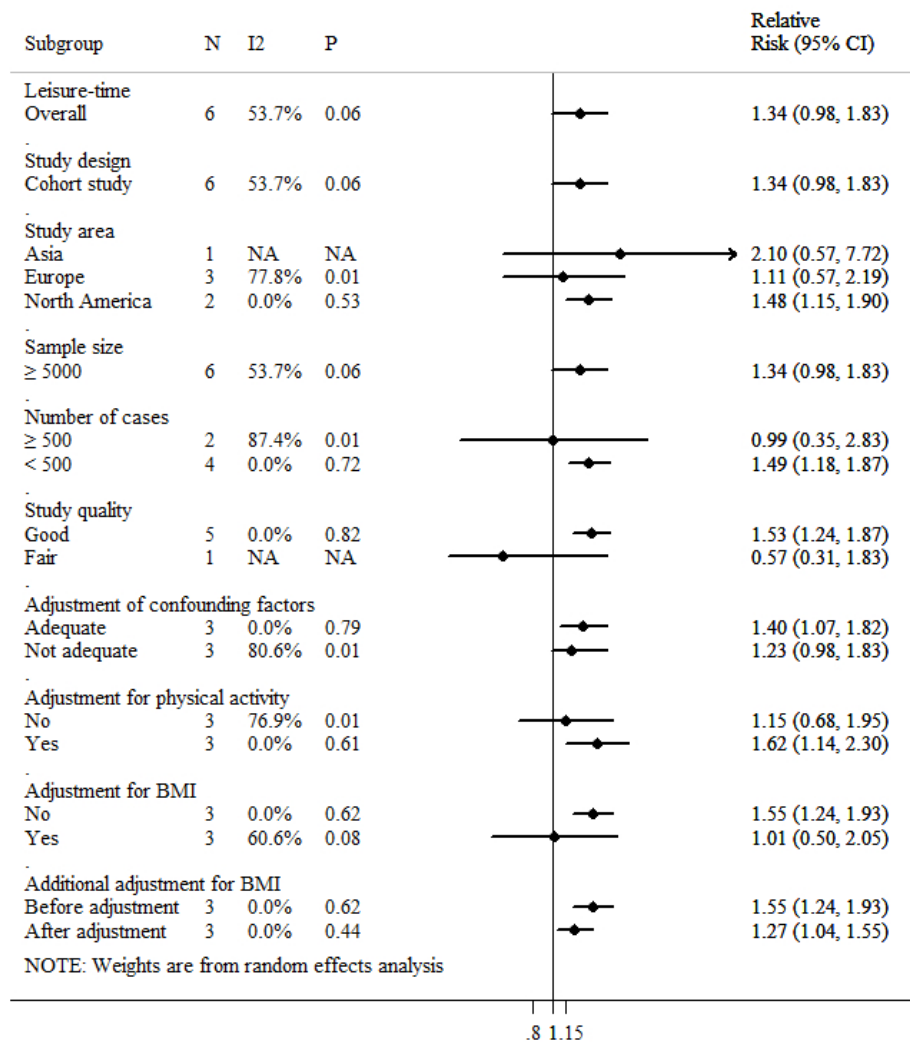

Figure 3. Pooled association between leisure-time sedentary behavior and endometrial cancer.

Note: I<sup>2</sup> for heterogeneity between studies; P value for heterogeneity in subgroups; NA: not applicable. Adequate adjustment denotes adjustment for at least five of seven confounders: age; diabetes, blood glucose; hypertension, blood pressure; age at menarche, menopausal status and age, parity; smoking; oral use of contraceptives, use of hormone replacement therapy; and physical activity. Adjustment for BMI denotes adjustment for BMI in the multivariate model.

246x277mm (72 x 72 DPI)

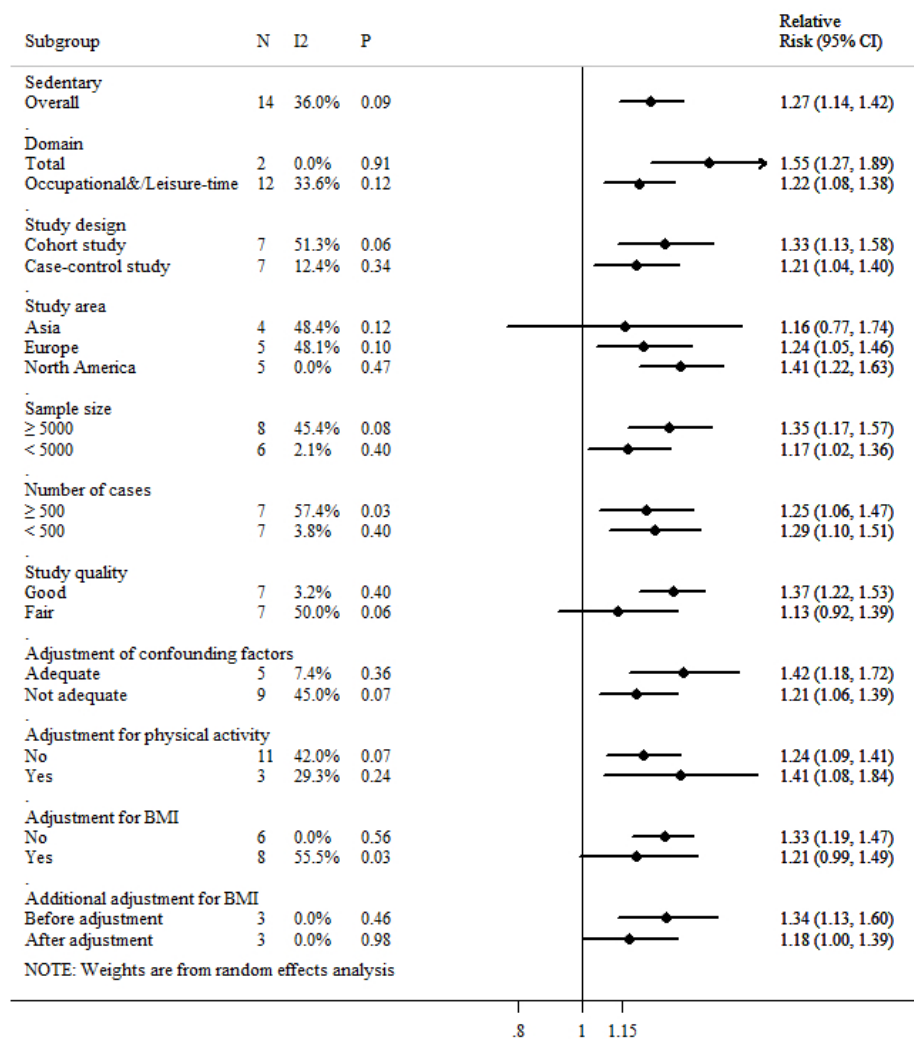

Figure 4. Pooled association between total sedentary behavior and endometrial cancer. Note: I2 for heterogeneity between studies; P value for heterogeneity in subgroups; NA: not applicable. Adequate adjustment denotes adjustment for at least five of seven confounders: age; diabetes, blood glucose; hypertension, blood pressure; age at menarche, menopausal status and age, parity; smoking; oral use of contraceptives, use of hormone replacement therapy; and physical activity. Adjustment for BMI denotes adjustment for BMI in the multivariate model.

247x277mm (72 x 72 DPI)

1  
2  
3  
4  
5  
6  
7  
8  
9  
10  
11  
12  
13  
14  
15  
16  
17  
18  
19  
20  
21  
22  
23  
24  
25  
26  
27  
28  
29  
30  
31  
32  
33  
34  
35  
36  
37  
38  
39  
40  
41  
42  
43  
44  
45  
46  
47  
48  
49  
50  
51  
52  
53  
54  
55  
56  
57  
58  
59  
60

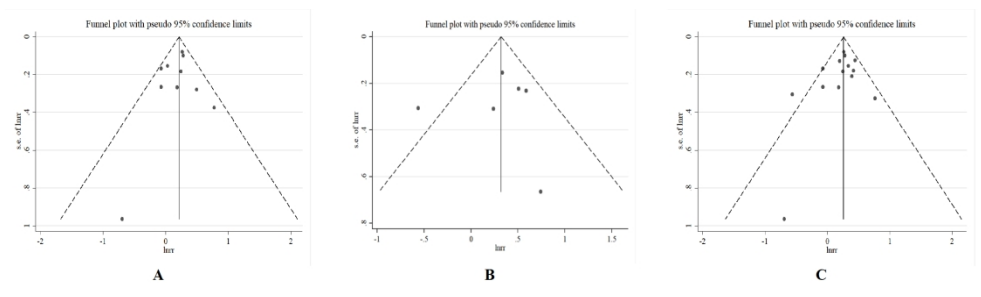

Figure 5. Funnel plot of overall sedentary behavior and endometrial cancer.  
450x156mm (144 x 144 DPI)

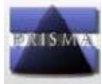

## PRISMA 2020 Checklist

| Section and Topic             | Item # | Checklist item                                                                                                                                                                                                                                                                                       | Location where item is reported |
|-------------------------------|--------|------------------------------------------------------------------------------------------------------------------------------------------------------------------------------------------------------------------------------------------------------------------------------------------------------|---------------------------------|
| <b>TITLE</b>                  |        |                                                                                                                                                                                                                                                                                                      |                                 |
| Title                         | 1      | Identify the report as a systematic review.                                                                                                                                                                                                                                                          | 1                               |
| <b>ABSTRACT</b>               |        |                                                                                                                                                                                                                                                                                                      |                                 |
| Abstract                      | 2      | See the PRISMA 2020 for Abstracts checklist.                                                                                                                                                                                                                                                         | 2                               |
| <b>INTRODUCTION</b>           |        |                                                                                                                                                                                                                                                                                                      |                                 |
| Rationale                     | 3      | Describe the rationale for the review in the context of existing knowledge.                                                                                                                                                                                                                          | 3-4                             |
| Objectives                    | 4      | Provide an explicit statement of the objective(s) or question(s) the review addresses.                                                                                                                                                                                                               | 5                               |
| <b>METHODS</b>                |        |                                                                                                                                                                                                                                                                                                      |                                 |
| Eligibility criteria          | 5      | Specify the inclusion and exclusion criteria for the review and how studies were grouped for the syntheses.                                                                                                                                                                                          | 6-7                             |
| Information sources           | 6      | Specify all databases, registers, websites, organisations, reference lists and other sources searched or consulted to identify studies. Specify the date when each source was last searched or consulted.                                                                                            | 6, Figure 1                     |
| Search strategy               | 7      | Present the full search strategies for all databases, registers and websites, including any filters and limits used.                                                                                                                                                                                 | 6-7                             |
| Selection process             | 8      | Specify the methods used to decide whether a study met the inclusion criteria of the review, including how many reviewers screened each record and each report retrieved, whether they worked independently, and if applicable, details of automation tools used in the process.                     | 7-8                             |
| Data collection process       | 9      | Specify the methods used to collect data from reports, including how many reviewers collected data from each report, whether they worked independently, any processes for obtaining or confirming data from study investigators, and if applicable, details of automation tools used in the process. | 7-8                             |
| Data items                    | 10a    | List and define all outcomes for which data were sought. Specify whether all results that were compatible with each outcome domain in each study were sought (e.g. for all measures, time points, analyses), and if not, the methods used to decide which results to collect.                        | 7-9                             |
|                               | 10b    | List and define all other variables for which data were sought (e.g. participant and intervention characteristics, funding sources). Describe any assumptions made about any missing or unclear information.                                                                                         | 7-9                             |
| Study risk of bias assessment | 11     | Specify the methods used to assess risk of bias in the included studies, including details of the tool(s) used, how many reviewers assessed each study and whether they worked independently, and if applicable, details of automation tools used in the process.                                    | 10                              |
| Effect measures               | 12     | Specify for each outcome the effect measure(s) (e.g. risk ratio, mean difference) used in the synthesis or presentation of results.                                                                                                                                                                  | 9-10                            |
| Synthesis methods             | 13a    | Describe the processes used to decide which studies were eligible for each synthesis (e.g. tabulating the study intervention characteristics and comparing against the planned groups for each synthesis (item #5)).                                                                                 | 9-11                            |
|                               | 13b    | Describe any methods required to prepare the data for presentation or synthesis, such as handling of missing summary statistics, or data conversions.                                                                                                                                                | 9-11                            |
|                               | 13c    | Describe any methods used to tabulate or visually display results of individual studies and syntheses.                                                                                                                                                                                               | 9-11                            |
|                               | 13d    | Describe any methods used to synthesize results and provide a rationale for the choice(s). If meta-analysis was performed, describe the model(s), method(s) to identify the presence and extent of statistical heterogeneity, and software package(s) used.                                          | 9-11                            |
|                               | 13e    | Describe any methods used to explore possible causes of heterogeneity among study results (e.g. subgroup analysis, meta-regression).                                                                                                                                                                 | 9-11                            |
|                               | 13f    | Describe any sensitivity analyses conducted to assess robustness of the synthesized results.                                                                                                                                                                                                         | 9-11                            |
| Reporting bias assessment     | 14     | Describe any methods used to assess risk of bias due to missing results in a synthesis (arising from reporting biases).                                                                                                                                                                              | 9-11                            |
| Certainty assessment          | 15     | Describe any methods used to assess certainty (or confidence) in the body of evidence for an outcome.<br>For peer review only - <a href="http://bmjopen.bmj.com/site/about/guidelines.xhtml">http://bmjopen.bmj.com/site/about/guidelines.xhtml</a>                                                  | 9-11                            |

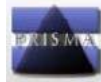

## PRISMA 2020 Checklist

| Section and Topic             | Item # | Checklist item                                                                                                                                                                                                                                                                       | Location where item is reported          |
|-------------------------------|--------|--------------------------------------------------------------------------------------------------------------------------------------------------------------------------------------------------------------------------------------------------------------------------------------|------------------------------------------|
| <b>RESULTS</b>                |        |                                                                                                                                                                                                                                                                                      |                                          |
| Study selection               | 16a    | Describe the results of the search and selection process, from the number of records identified in the search to the number of studies included in the review, ideally using a flow diagram.                                                                                         | 11, Figure 1                             |
|                               | 16b    | Cite studies that might appear to meet the inclusion criteria, but which were excluded, and explain why they were excluded.                                                                                                                                                          | 11                                       |
| Study characteristics         | 17     | Cite each included study and present its characteristics.                                                                                                                                                                                                                            | 11, Table 1                              |
| Risk of bias in studies       | 18     | Present assessments of risk of bias for each included study.                                                                                                                                                                                                                         | Figure 5                                 |
| Results of individual studies | 19     | For all outcomes, present, for each study: (a) summary statistics for each group (where appropriate) and (b) an effect estimate and its precision (e.g. confidence/credible interval), ideally using structured tables or plots.                                                     | Figure 2-4                               |
| Results of syntheses          | 20a    | For each synthesis, briefly summarise the characteristics and risk of bias among contributing studies.                                                                                                                                                                               | 11-15, Table 1, Supplemental material    |
|                               | 20b    | Present results of all statistical syntheses conducted. If meta-analysis was done, present for each the summary estimate and its precision (e.g. confidence/credible interval) and measures of statistical heterogeneity. If comparing groups, describe the direction of the effect. | 11-15, Figure 2-4                        |
|                               | 20c    | Present results of all investigations of possible causes of heterogeneity among study results.                                                                                                                                                                                       | 11-15, Figure 2-4, Supplemental material |
|                               | 20d    | Present results of all sensitivity analyses conducted to assess the robustness of the synthesized results.                                                                                                                                                                           | 11-15, Supplemental material             |
| Reporting biases              | 21     | Present assessments of risk of bias due to missing results (arising from reporting biases) for each synthesis assessed.                                                                                                                                                              | 11-15, Figure 5                          |
| Certainty of evidence         | 22     | Present assessments of certainty (or confidence) in the body of evidence for each outcome assessed.                                                                                                                                                                                  | 11-15, Supplemental material             |
| <b>DISCUSSION</b>             |        |                                                                                                                                                                                                                                                                                      |                                          |
| Discussion                    | 23a    | Provide a general interpretation of the results in the context of other evidence.                                                                                                                                                                                                    | 16                                       |
|                               | 23b    | Discuss any limitations of the evidence included in the review.                                                                                                                                                                                                                      | 19-20                                    |
|                               | 23c    | Discuss any limitations of the review processes used.                                                                                                                                                                                                                                | 19-20                                    |
|                               | 23d    | Discuss implications of the results for practice, policy, and future research.                                                                                                                                                                                                       | 16-20                                    |
| <b>OTHER INFORMATION</b>      |        |                                                                                                                                                                                                                                                                                      |                                          |
| Registration and protocol     | 24a    | Provide registration information for the review, including register name and registration number, or state that the review was not registered.                                                                                                                                       | 6                                        |
|                               | 24b    | Indicate where the review protocol can be accessed, or state that a protocol was not prepared.                                                                                                                                                                                       | 6                                        |
|                               | 24c    | Describe and explain any amendments to information provided at registration or in the protocol.                                                                                                                                                                                      | 6                                        |
| Support                       | 25     | Describe sources of financial or non-financial support for the review, and the role of the funders or sponsors in the review.                                                                                                                                                        | 21                                       |

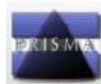

## PRISMA 2020 Checklist

1  
2  
3  
4  
5  
6  
7  
8  
9  
10  
11  
12  
13  
14  
15  
16  
17  
18  
19  
20  
21  
22  
23  
24  
25  
26  
27  
28  
29  
30  
31  
32  
33  
34  
35  
36  
37  
38  
39  
40  
41  
42  
43  
44  
45  
46  
47

| Section and Topic                              | Item # | Checklist item                                                                                                                                                                                                                             | Location where item is reported |
|------------------------------------------------|--------|--------------------------------------------------------------------------------------------------------------------------------------------------------------------------------------------------------------------------------------------|---------------------------------|
| Competing interests                            | 26     | Declare any competing interests of review authors.                                                                                                                                                                                         | 21                              |
| Availability of data, code and other materials | 27     | Report which of the following are publicly available and where they can be found: template data collection forms; data extracted from included studies; data used for all analyses; analytic code; any other materials used in the review. | 21                              |

From: Page MJ, McKenzie JE, Bossuyt PM, Boutron I, Hoffmann TC, Mulrow CD, et al. The PRISMA 2020 statement: an updated guideline for reporting systematic reviews. *BMJ* 2021;372:n71. doi: 10.1136/bmj.n71

For more information, visit: <http://www.prisma-statement.org/>

**MOOSE reporting checklist for meta-analyses of observational studies.**

| Reporting section and item          |                                                                                                                                                                                                                                                                              | Reported on page                   |
|-------------------------------------|------------------------------------------------------------------------------------------------------------------------------------------------------------------------------------------------------------------------------------------------------------------------------|------------------------------------|
| <b>Reporting of background</b>      |                                                                                                                                                                                                                                                                              |                                    |
| 1                                   | Problem definition                                                                                                                                                                                                                                                           | 4-5                                |
| 2                                   | Hypothesis statement                                                                                                                                                                                                                                                         | 5-6                                |
| 3                                   | Description of study outcome(s)                                                                                                                                                                                                                                              | 6                                  |
| 4                                   | Type of exposure or intervention used                                                                                                                                                                                                                                        | 6                                  |
| 5                                   | Type of study designs used                                                                                                                                                                                                                                                   | 6                                  |
| 6                                   | Study population                                                                                                                                                                                                                                                             | 6                                  |
| <b>Reporting of search strategy</b> |                                                                                                                                                                                                                                                                              |                                    |
| 1                                   | Qualifications of searchers (eg, librarians and investigators)                                                                                                                                                                                                               | 7-8                                |
| 2                                   | Search strategy, including time period included in the synthesis and keywords                                                                                                                                                                                                | 6-7,<br>Supplementary Text         |
| 3                                   | Effort to include all available studies, including contact with authors                                                                                                                                                                                                      | 8                                  |
| 4                                   | Databases and registries searched                                                                                                                                                                                                                                            | 6-7                                |
| 5                                   | Search software used, name and version, including special features used (eg, explosion)                                                                                                                                                                                      | 6-7                                |
| 6                                   | Use of hand searching (eg, reference lists of obtained articles)                                                                                                                                                                                                             | 6-7                                |
| 7                                   | List of citations located and those excluded, including justification                                                                                                                                                                                                        | Figure 1                           |
| 8                                   | Method of addressing articles published in languages other than in English                                                                                                                                                                                                   | 7                                  |
| 9                                   | Method of handing abstracts and unpublished studies                                                                                                                                                                                                                          | 7                                  |
| 10                                  | Description of any contact with authors                                                                                                                                                                                                                                      | 8                                  |
| <b>Reporting of methods</b>         |                                                                                                                                                                                                                                                                              |                                    |
| 1                                   | Description of relevance or appropriateness of studies assembled for assessing the hypothesis to be tested                                                                                                                                                                   | 7-8                                |
| 2                                   | Rationale for the selection and coding of data (eg, sound clinical principles or convenience)                                                                                                                                                                                | 7-9                                |
| 3                                   | Documentation of how data were classified and coded (eg, multiple raters, binding, and interrater reliability)                                                                                                                                                               | 9-11,<br>Supplemental material     |
| 4                                   | Assessment of confounding (eg, comparability of cases and controls in studies where appropriate)                                                                                                                                                                             | 10,<br>Supplemental material       |
| 5                                   | Assessment of study quality, including binding of quality assessors; stratification or regression on possible predictors of study results                                                                                                                                    | 10,<br>Supplemental material       |
| 6                                   | Assessment of heterogeneity                                                                                                                                                                                                                                                  | 9                                  |
| 7                                   | Description of statistical methods (eg, complete description of fixed or random effects models, justification of whether the chosen models account for predictors of study results, dose-response models, or cumulative meta-analyses) in sufficient detail to be replicated | 9                                  |
| 8                                   | Provision of appropriate tables and graphics                                                                                                                                                                                                                                 | Figure 1,<br>Supplemental material |

| <b>Reporting of results</b>    |                                                                                                                           |                                   |
|--------------------------------|---------------------------------------------------------------------------------------------------------------------------|-----------------------------------|
| 1                              | Graphic summarizing individual study estimates and overall estimate                                                       | Figure 2-4                        |
| 2                              | Table giving descriptive information for each study included                                                              | Table 1,<br>Supplemental material |
| 3                              | Results of sensitivity testing (eg, subgroup analysis)                                                                    | 13-14,<br>Supplemental material   |
| 4                              | Indication of statistical uncertainty of findings                                                                         | 13-14,<br>Supplemental material   |
| <b>Reporting of discussion</b> |                                                                                                                           |                                   |
| 1                              | Quantitative assessment of bias (eg, publication bias)                                                                    | 12-15, Figure 5                   |
| 2                              | Justification for exclusion (eg, exclusion for non-English-language citations)                                            | 11                                |
| 3                              | Assessment of quality of included studies                                                                                 | 11,<br>Supplemental material      |
| <b>Reporting of conclusion</b> |                                                                                                                           |                                   |
| 1                              | Consideration of alternative explanations for observed results                                                            | 16-18                             |
| 2                              | Generalization of the conclusions (ie, appropriate for the data presented and within the domain of the literature review) | 17                                |
| 3                              | Guideline for future research                                                                                             | 17-20                             |
| 4                              | Disclosure of funding source                                                                                              | 21                                |



## Supplementary Materials

### **The association between domain-specific sedentary behavior and endometrial cancer: A systematic review and meta-analysis**

Lei Yuan<sup>1,2</sup>, Jingyi Ni<sup>1</sup>, Wen Lu<sup>3</sup>, Qin Yan<sup>3</sup>, Xiaoping Wan<sup>3,4\*</sup>, Zhen Li<sup>1\*</sup>

<sup>1</sup>Clinical Research Center, Shanghai First Maternity and Infant Hospital, Tongji University School of Medicine, Shanghai, China.

<sup>2</sup>Department of Global Health Policy, Graduate School of Medicine, The University of Tokyo, Tokyo, Japan.

<sup>3</sup>Division of Gynecologic Oncology, Department of Gynecology, Shanghai First Maternity and Infant Hospital, Tongji University School of Medicine, Shanghai, China.

<sup>4</sup>Shanghai Key Laboratory of Maternal Fetal Medicine, Shanghai First Maternity and Infant Hospital, School of Medicine, Tongji University, Shanghai 200092, China

**Correspondence to:** Xiaoping Wan, Division of Gynecologic Oncology, Department of Gynecology, Shanghai First Maternity and Infant Hospital, Tongji University School of Medicine, 2699 West Gaoke Road, Shanghai 201204, China. E-mail: wanxiaoping@tongji.edu.cn. or Zhen Li, Shanghai First Maternity and Infant Hospital, Tongji University School of Medicine, 2699 West Gaoke Road, Shanghai 201204, China. E-mail: zhen\_li@tongji.edu.cn.

\*These authors are co-corresponding authors.

1  
2  
3  
4 **Supplemental Text.** Search terms and strategy

5 **Table S3.** Detailed data underlying the meta-analysis.

6  
7 **Table S4.** Characteristics of participants and assessment of sedentary behaviour and  
8  
9  
10 outcome.

11 **Table S5.** Newcastle-Ottawa quality assessment scale for cohort study

12 **Table S6.** Newcastle-Ottawa quality assessment scale for case-control study

13 **Table S7.** Detailed information on adjusted confounders of studies included in  
14  
15  
16  
17 systematic review

18  
19 **Table S8.** Influence analysis of sedentary behaviour and endometrial cancer (given  
20  
21  
22 named study is omitted).

23 **Table S9.** Results of meta-regression analyses on individual study characteristics for  
24  
25  
26  
27  
28  
29  
30  
31  
32  
33  
34  
35  
36  
37  
38  
39  
40  
41  
42  
43  
44  
45  
46  
47  
48  
49  
50  
51  
52  
53  
54  
55  
56  
57  
58  
59  
60  
studies included in the meta-analysis of the association between sedentary behaviour  
and the risk of endometrial cancer.

### Search terms and strategy

Search strategy in Embase/MEDLINE

('sedentary behavior':ab,ti OR 'physical inactivity':ab,ti OR 'sedentary lifestyle':ab,ti OR 'sedentary behaviour':ab,ti OR sedentary:ab,ti OR 'sitting time':ab,ti OR 'screen time':ab,ti OR 'television viewing':ab,ti OR 'physical activity':ab,ti) AND ('endometrial cancer':ab,ti OR endometrium:ab,ti OR 'uterus cancer':ab,ti OR 'uterine cancer':ab,ti OR 'corpus uteri cancer':ab,ti)

Search strategy in PubMed

((sedentary behavior[MeSH] OR physical inactivity[Title/Abstract] OR sedentary lifestyle[Title/Abstract] OR sedentary behaviour[Title/Abstract] OR sedentary[Title/Abstract] OR sitting time[Title/Abstract] OR screen time[Title/Abstract] OR television viewing[Title/Abstract] OR physical activity[Title/Abstract]) AND (endometrial cancer[MeSH] OR endometrium[Title/Abstract] OR uterus cancer[Title/Abstract] OR uterine cancer[Title/Abstract] OR corpus uteri cancer[Title/Abstract])

**Table S3.** Detailed data underlying the meta-analysis.

Table S3-1. Detailed data for overall sedentary behaviour and endometrial cancer underlying the meta-analysis.

| Author       | Year | Domain                     | Study design       | Study area    | Sample size | Number of cases | RR (95% CI)       | Adjustment of confounding factors | Study quality | Adjustment for physical activity | Adjustment for BMI |
|--------------|------|----------------------------|--------------------|---------------|-------------|-----------------|-------------------|-----------------------------------|---------------|----------------------------------|--------------------|
| Gierach      | 2009 | Total                      | Cohort study       | North America | ≥ 5000      | ≥ 500           | 1.56 (1.22, 1.99) | Not adequate                      | Good          | No                               | No                 |
| Arem         | 2011 | Total                      | Case-control study | North America | ≥ 5000      | ≥ 500           | 1.52 (1.07, 2.16) | Adequate                          | Fair          | No                               | Yes                |
| Dosemeci     | 1993 | Occupational&/Leisure-time | Case-control study | Asia          | < 5000      | < 500           | 0.50 (0.10, 4.40) | Not adequate                      | Fair          | No                               | No                 |
| Shu          | 1993 | Occupational&/Leisure-time | Case-control study | Asia          | < 5000      | < 500           | 1.20 (0.70, 2.00) | Not adequate                      | Fair          | No                               | yes                |
| Olson        | 1997 | Occupational&/Leisure-time | Case-control study | North America | < 5000      | < 500           | 0.93 (0.55, 1.56) | Adequate                          | Good          | No                               | Yes                |
| Moradi       | 2000 | Occupational&/Leisure-time | Case-control study | Europe        | < 5000      | ≥ 500           | 1.32 (1.08, 1.60) | Not adequate                      | Good          | No                               | Yes                |
| Weiderpass   | 2001 | Occupational&/Leisure-time | Cohort study       | Europe        | ≥ 5000      | ≥ 500           | 1.30 (1.10, 1.50) | Not adequate                      | Fair          | No                               | No                 |
| Furberg      | 2003 | Occupational&/Leisure-time | Cohort study       | Europe        | ≥ 5000      | < 500           | 1.48 (0.97, 2.20) | Adequate                          | Good          | Yes                              | Yes                |
| Matthews     | 2005 | Occupational&/Leisure-time | Case-control study | Asia          | < 5000      | ≥ 500           | 0.93 (0.67, 1.30) | Not adequate                      | Fair          | No                               | Yes                |
| Friedenreich | 2010 | Occupational&/Leisure-time | Case-control study | North America | < 5000      | ≥ 500           | 1.28 (0.89, 1.83) | Not adequate                      | Fair          | No                               | Yes                |
| Miyata       | 2020 | Occupational&/Leisure-time | Cohort study       | Asia          | ≥ 5000      | < 500           | 2.15 (1.13, 4.09) | Adequate                          | Good          | Yes                              | Yes                |
| Friberg      | 2006 | Occupational&/Leisure-time | Cohort study       | Europe        | ≥ 5000      | < 500           | 1.22 (0.95, 1.57) | Not adequate                      | Good          | Yes                              | No                 |
| Patel        | 2008 | Occupational&/Leisure-time | Cohort study       | North America | ≥ 5000      | < 500           | 1.40 (1.03, 1.89) | Adequate                          | Good          | No                               | No                 |
| Hunter       | 2020 | Occupational&/Leisure-time | Cohort study       | Europe        | ≥ 5000      | ≥ 500           | 0.57 (0.31, 1.03) | Not adequate                      | Fair          | No                               | Yes                |

1  
2  
3  
4  
5  
6  
7  
8  
9  
10  
11  
12  
13  
14  
15  
16  
17  
18  
19  
20  
21  
22  
23  
24  
25  
26  
27  
28  
29  
30  
31  
32  
33  
34  
35  
36  
37  
38  
39  
40  
41  
42  
43  
44  
45  
46

Table S3-2. Detailed data for occupational sedentary behaviour and endometrial cancer underlying the meta-analysis.

| Author       | Year | Study design       | Study area    | Sample size | Number of cases | RR (95%CI)        | Adjustment of confounding factors | Study quality | Adjustment for physical activity | Adjustment for BMI | Additional adjustment for BMI |
|--------------|------|--------------------|---------------|-------------|-----------------|-------------------|-----------------------------------|---------------|----------------------------------|--------------------|-------------------------------|
| Dosemeci     | 1993 | Case-control study | Asia          | < 5000      | < 500           | 0.50 (0.10, 4.40) | Not adequate                      | Fair          | No                               | No                 |                               |
| Shu          | 1993 | Case-control study | Asia          | < 5000      | < 500           | 1.20 (0.70, 2.00) | Not adequate                      | Fair          | No                               | Yes                |                               |
| Olson        | 1997 | Case-control study | North America | < 5000      | < 500           | 0.93 (0.55, 1.56) | Adequate                          | Good          | No                               | Yes                |                               |
| Moradi       | 2000 | Case-control study | Europe        | < 5000      | ≥ 500           | 1.32 (1.08, 1.60) | Not adequate                      | Good          | No                               | Yes                |                               |
| Weiderpass   | 2001 | Cohort study       | Europe        | ≥ 5000      | ≥ 500           | 1.30 (1.10, 1.50) | Not adequate                      | Fair          | No                               | No                 |                               |
| Furberg      | 2003 | Cohort study       | Europe        | ≥ 5000      | < 500           | 1.64 (0.95, 2.84) | Adequate                          | Good          | Yes                              | Yes                |                               |
| Matthews     | 2005 | Case-control study | Asia          | < 5000      | ≥ 500           | 0.93 (0.67, 1.30) | Not adequate                      | Fair          | No                               | Yes                |                               |
| Friberg      | 2006 | Cohort study       | Europe        | ≥ 5000      | < 500           | 1.03 (0.76, 1.39) | Not adequate                      | Good          | Yes                              | No                 | 0.99 (0.73, 1.34)             |
| Friedenreich | 2010 | Case-control study | North America | < 5000      | ≥ 500           | 1.28 (0.89, 1.83) | Not adequate                      | Fair          | No                               | Yes                |                               |
| Miyata       | 2020 | Cohort study       | Asia          | ≥ 5000      | < 500           | 2.17 (1.04, 4.56) | Adequate                          | Good          | Yes                              | Yes                |                               |

Table 3-3. Detailed data for leisure-time sedentary behaviour and endometrial cancer underlying the meta-analysis.

| Author  | Year | Study design | Study area    | Sample size | Number of cases | RR (95% CI)       | Adjustment of confounding factors | Study quality | Adjustment for physical activity | Adjustment for BMI | Additional adjustment for BMI |
|---------|------|--------------|---------------|-------------|-----------------|-------------------|-----------------------------------|---------------|----------------------------------|--------------------|-------------------------------|
| Furberg | 2003 | Cohort study | Europe        | ≥ 5000      | < 500           | 1.27 (0.69, 2.32) | Adequate                          | Good          | Yes                              | Yes                |                               |
| Friberg | 2006 | Cohort study | Europe        | ≥ 5000      | < 500           | 1.80 (1.14, 2.83) | Not adequate                      | Good          | Yes                              | No                 | 1.66 (1.05, 2.61)             |
| Patel   | 2008 | Cohort study | North America | ≥ 5000      | < 500           | 1.40 (1.03, 1.89) | Adequate                          | Good          | No                               | No                 | 1.18 (0.87, 1.59)             |
| Gierach | 2009 | Cohort study | North America | ≥ 5000      | ≥ 500           | 1.66 (1.20, 2.88) | Not adequate                      | Good          | No                               | No                 | 1.21 (0.87, 1.67)             |
| Hunter  | 2020 | Cohort study | Europe        | ≥ 5000      | ≥ 500           | 0.57 (0.31, 1.03) | Not adequate                      | Fair          | No                               | Yes                |                               |
| Miyata  | 2020 | Cohort study | Asia          | ≥ 5000      | < 500           | 2.10 (0.57, 7.71) | Adequate                          | Good          | Yes                              | Yes                |                               |

**Table S4.** Study characteristics of the included studies in systematic review.

| Publication   | Participants' characteristics                                                                                                                                                                                                                                   | Outcome                       |                                                                                                    | Sedentary behavior     | Definition and assessment of sedentary behavior                                                                                                                                                                                                                                                                                                                               |
|---------------|-----------------------------------------------------------------------------------------------------------------------------------------------------------------------------------------------------------------------------------------------------------------|-------------------------------|----------------------------------------------------------------------------------------------------|------------------------|-------------------------------------------------------------------------------------------------------------------------------------------------------------------------------------------------------------------------------------------------------------------------------------------------------------------------------------------------------------------------------|
|               |                                                                                                                                                                                                                                                                 | Diagnostic criteria           | Specific cancer classification                                                                     |                        |                                                                                                                                                                                                                                                                                                                                                                               |
| Dosemeci 1993 | Hospital-based study population.                                                                                                                                                                                                                                | —                             | —                                                                                                  | Occupational sedentary | Occupational Classification (SOC) code system: the sitting-time scale was defined as low activity (sedentary, i.e., sitting more than six hours a day); moderate activity (mod, i.e., sitting two to six hours a day); and high activity (active, i.e., sitting less than two hours a day)                                                                                    |
| Shu 1993      | Cases were identified through the population-based Shanghai Cancer Registry; female controls were individually matched to the cases on age through Shanghai Resident Registry.                                                                                  | Histopathologically confirmed | Adenocarcinomas (76.2%), adenosquamous cancers (6.3%), other type (13.4%), and unspecified (4.1%). | Occupational sedentary | Interview using standardized coding scheme: sitting time index assessing the amount of time in a sitting posture on the job. Job with long sitting-times were defined as those with more than 80% of working hours spent sitting; moderate sitting-time jobs as 20-80% of working hours of time spent sitting; short sitting-time jobs as less than 20% of time spent sitting |
| Zheng 1993*   | Employment information for incident patients with cancer aged 30 years or older whose disease was diagnosed during the period 1980-1984 among the residents of urban Shanghai was compared with occupational data from the 1982 census for the same population. | ICD-9, code 182               | —                                                                                                  | Occupational sedentary | Same as Shu et al.1993                                                                                                                                                                                                                                                                                                                                                        |
| Olson 1997    | Incident cases of primary endometrial cancer were identified from the major hospitals in western New York State. Controls without prior hysterectomy were selected from the community by age.                                                                   | Histologically confirmed      | Adenomatous carcinoma                                                                              | Occupational sedentary | Three measures were used for occupational activity: an index of cumulative activity; the number of years in occupations with medium, heavy, or very heavy activity; and the activity level of the most recent job. An estimate of physical activity associated with employment was obtained from a detailed occupational history covering                                     |

|              |                                                                                                                                                                                                                                                                                                                                                                                            |                                                  |   |                        |                                                                                                                                                                                                                                                                                                                                                                                                               |
|--------------|--------------------------------------------------------------------------------------------------------------------------------------------------------------------------------------------------------------------------------------------------------------------------------------------------------------------------------------------------------------------------------------------|--------------------------------------------------|---|------------------------|---------------------------------------------------------------------------------------------------------------------------------------------------------------------------------------------------------------------------------------------------------------------------------------------------------------------------------------------------------------------------------------------------------------|
|              |                                                                                                                                                                                                                                                                                                                                                                                            |                                                  |   |                        | all jobs held for 6 months or longer. Occupations for job title and industry were coded according to the U.S. Department of Commerce Alphabetical Index of Occupations for the 1980 Census, and the U.S. Department of Labor's Estimates of Worker Trait Requirements were used to classify the activity level of each job as sedentary, light, medium, heavy, or very heavy based on job title and industry. |
| Moradi 1998* | Swedish Cancer Environment Registry III (the national Swedish Cancer Register for 1971-1989 linked with the national population censuses from 1960 and 1970)                                                                                                                                                                                                                               | ICD-7, code 172 and were histologically verified | — | Occupational sedentary | Occupations coding scheme; classified each occupation according to the estimated physical demands of the job, as very high, high, moderate, light and sedentary activity. Assessments were done independently by 3 Swedish specialists in occupational medicine with long experience in job classification.                                                                                                   |
| Moradi 2000  | Postmenopausal women with an intact uterus and no previous breast or endometrial cancer diagnosis; Cases were women with an incident, primary, histopathologically confirmed endometrial cancer identified through the six regional cancer registries in Sweden; Control women were randomly selected from the continuously updated population register including all residents of Sweden. | Histopathologically confirmed                    | — | Occupational sedentary | Occupations coding scheme; classified each occupation according to the estimated physical demands of the job, as very high, high, moderate, light and sedentary activity. Assessments were done independently by 3 Swedish specialists in occupational medicine with long experience in job classification.                                                                                                   |



|                        |                                                                                                                                                                                                                                                                                                                                       |                                                                                                                                                     |                                                                                                                   |                               |                                                                                                                                                                                                                                                                                                                                                                                                      |
|------------------------|---------------------------------------------------------------------------------------------------------------------------------------------------------------------------------------------------------------------------------------------------------------------------------------------------------------------------------------|-----------------------------------------------------------------------------------------------------------------------------------------------------|-------------------------------------------------------------------------------------------------------------------|-------------------------------|------------------------------------------------------------------------------------------------------------------------------------------------------------------------------------------------------------------------------------------------------------------------------------------------------------------------------------------------------------------------------------------------------|
| <p>Weiderpass 2001</p> | <p>Population Census of Finland 1970 excluded women in the two highest social classes.</p>                                                                                                                                                                                                                                            | <p>ICD-9, code 182</p>                                                                                                                              | <p>—</p>                                                                                                          | <p>Occupational sedentary</p> | <p>A national job-exposure matrix (FINJEM) calculated the product of level and probability of an exposure, and subdivided into three categories: zero (reference category); low (roughly below median among job titles with exposure probability &gt; 0); and medium/high (called for simplicity 'high'; defined as equal or above the median among job titles with exposure probability &gt; 0)</p> |
| <p>Furberg 2003</p>    | <p>Alive women with complete data and no diagnosis of any malignant disease 1 year after participation in Norwegian National Health Screening Service's program.</p>                                                                                                                                                                  | <p>Incident, primary, histopathologically confirmed carcinoma of the endometrium</p>                                                                | <p>127 adenocarcinomas (1 serious papillary adenocarcinoma = type II-carcinoma), and 3 unspecified carcinomas</p> | <p>Recreational sedentary</p> | <p>Recreational activity: Grade1, Reading, watching television or other sedentary activity; Grade2, Walking, bicycling or other activity for at least 4 hr per week; Grade3, Recreational athletics, heavy gardening or similar activities at least 4 hr per week; and Grade 4, Regular (several times a week) training or participation in athletic competitions</p>                                |
| <p>Matthews 2005</p>   | <p>Incident cases aged 30-69 who were permanent residents were identified from the Shanghai Cancer Registry; Controls, frequency matched to cases by age (<math>\pm 5</math> years), were randomly selected from permanent female residents using the Shanghai Resident Registry. Women who had a hysterectomy were not eligible.</p> | <p>The diagnosis of each case was confirmed by medical chart review and a review of the available pathology slides by senior study pathologists</p> | <p>—</p>                                                                                                          | <p>Occupational sedentary</p> | <p>Occupations were classified into high, medium, or low levels of estimated sitting time and activity level using job codes based on self-reported jobs held for at least 3 years</p>                                                                                                                                                                                                               |

|               |                                                                                                                                                                                                                                                                                                                                |                                                                                                                                                             |                         |                        |                                                                                                                                                                                                                                                                                                                                                                                                                                                                                                                                   |
|---------------|--------------------------------------------------------------------------------------------------------------------------------------------------------------------------------------------------------------------------------------------------------------------------------------------------------------------------------|-------------------------------------------------------------------------------------------------------------------------------------------------------------|-------------------------|------------------------|-----------------------------------------------------------------------------------------------------------------------------------------------------------------------------------------------------------------------------------------------------------------------------------------------------------------------------------------------------------------------------------------------------------------------------------------------------------------------------------------------------------------------------------|
| Frieberg 2006 | Cohort members from mammography screening program, women diagnosed with cancer (other than nonmelanoma skin cancer) and those having had a hysterectomy before returning the follow-up questionnaire, and with missing information on physical activity were excluded.                                                         | The Swedish Cancer Register and the Regional Cancer Register                                                                                                | —                       | Occupational sedentary | Duration of specific activities was asked and assigned mean metabolic equivalent (MET) values [multiples of MET (kcal kg <sup>-1</sup> h <sup>-1</sup> )] based on specific activities within corresponding categories in a physical activity compendium. Occupational activity: low: mostly sitting (1.3 MET/h), and sitting down more than half the time (1.8 MET/h); high: mostly standing (2.2 MET/h), doing lifts (2.6 MET/h), a lot of lifts (3.0 MET/h), and heavy labor (3.9 MET/h)                                       |
| Patel 2008    | Postmenopausal women in the American Cancer Society Cancer Prevention Study II (CPS-II) Nutrition Cohort, a large prospective study in the US, excluded women who reported prevalent cancer (except nonmelanoma skin cancer) or not being postmenopausal or who had a hysterectomy or unknown hysterectomy status at baseline. | Self-report on follow-up questionnaire and subsequently verified from medical records or linkage with state cancer registries, and the National Death Index | Endometrial carcinomas  | Recreational sedentary | For leisure time inactivity, there were five predefined categories for time spent per day watching TV/sitting (inactive leisure time, <1 hour daily to >6 hours daily, 1.2 MET/h)<br><br>Based on the question "During the past year, on an average day, (not counting time spent at your job) how many hours per day did you spend sitting (watching TV, reading, etc.)?" Responses included "none, less than 3, 3–5, 6–8, more than 8hr/day." Sedentary behavior at baseline was categorized as 0–<3, 3–5, ≥6 or missing hr/day |
| Gierach 2009  | Female members of the AARP (the American Association of Retired Persons) and resided in US states.                                                                                                                                                                                                                             | State cancer registries, and histology was defined using ICD for Oncology codes, 3rd edition                                                                | Adenocarcinomas (95.0%) | Recreational sedentary | Information on physical inactivity was based on two questions. Participants were asked about time spent watching TV or videos during a typical 24-hour period over the past 12 months. Time spent watching TV or videos was categorized as none, <1 hour, 1–2, 3–4, 5–6, 7–8, and ≥ 9 hours                                                                                                                                                                                                                                       |

|                   |                                                                                                                                                                                                                                                                              |                                                                                                                                   |   |                        |                                                                                                                                                                                                                                                                                                                                                                                     |
|-------------------|------------------------------------------------------------------------------------------------------------------------------------------------------------------------------------------------------------------------------------------------------------------------------|-----------------------------------------------------------------------------------------------------------------------------------|---|------------------------|-------------------------------------------------------------------------------------------------------------------------------------------------------------------------------------------------------------------------------------------------------------------------------------------------------------------------------------------------------------------------------------|
|                   |                                                                                                                                                                                                                                                                              |                                                                                                                                   |   | Total sedentary        | In a separate question, participants were also asked to indicate the number of hours spent sitting during a typical 24-hour period over the past 12 months: <3, 3–4, 5–6, 7–8, and ≥ 9 hours. Both measures of inactivity were collapsed as <3, 3–4, 5–6, and ≥ 7 hours per day                                                                                                     |
| Friedenreich 2010 | Cases were Alberta residents, English-speaking, able to complete interview and questionnaire, and did not have another previous cancer except nonmelanoma skin cancer. Controls were identified using random-digit dialing and frequency matched to cases on age (±5 years). | Incident, histologically confirmed invasive cases of endometrial cancer were identified directly from the Alberta Cancer Registry | — | Occupational sedentary | Lifetime occupational sedentary activity was estimated using a validated questionnaire. The patterns of physical activity were recorded by the interviewer including the age started, age ended, number of months per year, weeks per month, days per week and hours per day that each activity was performed so that the frequency and duration of these activities is determined. |
| Arem 2011         | English-speaking, Connecticut residents diagnosed with primary endometrial cancer. Population-based controls were identified using random-digit dialing (RDD) and were frequency matched on age.                                                                             | —                                                                                                                                 | — | Total sedentary        | Time seated watching multimedia or sitting at work was calculated as hours per week from self-report in the two to five years before interview                                                                                                                                                                                                                                      |
| Hunter 2020       | Participants of UK Biobank cohort without been diagnosed with malignant cancer (excluding non-melanoma skin cancer), and have completed self-report screen time assessment.                                                                                                  | Uterus cancer identified from national cancer registries (ICD-10: C54; ICD-9: 182)                                                | — | Recreational sedentary | Television (TV) viewing time: "In a typical DAY, how many hours do you spend watching TV?"<br>Daily recreational computer use time: "In a typical DAY, how many hours do you spend using the computer? (Do not include using a computer at work)."<br>Daily total recreational screen time: self-reported time spent watching TV, and time spent using the computer outside of work |

|             |                                                                                                                                                                      |                                                                                      |   |                        |                                                                                                                      |
|-------------|----------------------------------------------------------------------------------------------------------------------------------------------------------------------|--------------------------------------------------------------------------------------|---|------------------------|----------------------------------------------------------------------------------------------------------------------|
| Miyata 2020 | Japanese inhabitants participated in municipal health screening examinations with completed questionnaires and no history of cancer or uterine surgery at enrolment. | Cancer registries or local major hospital records coded according to the ICD-10: C54 | — | Recreational sedentary | Television (TV) viewing (< 1, 1 to < 2, 2 to < 3, 3 to < 4, $\geq$ 4hr/day)                                          |
|             |                                                                                                                                                                      |                                                                                      |   | Occupational sedentary | Occupational activity was classified according to the position during work (mainly sitting, mainly standing, moving) |

Note: Table values are mean (SD) for continuous variables; ICD, International Classification of Disease; \* studies not included in the meta-analysis.

For peer review only

**Table S5.** Newcastle-Ottawa quality assessment scale for cohort study.

| Source          | Selection                                |                                     |                           | Demonstration That Outcome of Interest Was Not Present at Start of Study | Comparability                                                   |                       | Outcome                                         |                                  | Total Stars |
|-----------------|------------------------------------------|-------------------------------------|---------------------------|--------------------------------------------------------------------------|-----------------------------------------------------------------|-----------------------|-------------------------------------------------|----------------------------------|-------------|
|                 | Representativeness of the Exposed Cohort | Selection of the Non-Exposed Cohort | Ascertainment of Exposure |                                                                          | Comparability of Cohorts on the Basis of the Design or Analysis | Assessment of Outcome | Was Follow-Up Long Enough for Outcomes to Occur | Adequacy of Follow Up of Cohorts |             |
| Hunter 2020     | 1                                        | 1                                   | -                         | 1                                                                        | 1                                                               | 1                     | 1                                               | -                                | 6           |
| Miyata 2020     | 1                                        | 1                                   | -                         | 1                                                                        | 2                                                               | 1                     | 1                                               | 1                                | 8           |
| Gierach 2009    | 1                                        | 1                                   | -                         | 1                                                                        | 1                                                               | 1                     | 1                                               | 1                                | 7           |
| Patel 2008      | 1                                        | 1                                   | -                         | 1                                                                        | 1                                                               | 1                     | 1                                               | 1                                | 7           |
| Friberg 2006    | 1                                        | 1                                   | -                         | 1                                                                        | 2                                                               | 1                     | 1                                               | 1                                | 8           |
| Furberg 2003    | 1                                        | 1                                   | 1                         | 1                                                                        | 2                                                               | 1                     | 1                                               | 1                                | 9           |
| Weiderpass 2001 | 1                                        | 1                                   | 1                         | -                                                                        | -                                                               | 1                     | 1                                               | -                                | 5           |

Note: A study can be awarded a maximum of one star for each numbered item within the Selection and Outcome categories. A maximum of two stars can be given for Comparability. For comparability in our analysis, a study can be awarded one star for controlling for age; Two stars for also controlling for physical activity.

**Table S6.** Newcastle-Ottawa quality assessment scale for case-control study.

| Source                   | Selection                        |                                 |                       | Comparability          |                                                                            | Exposure                  |                                                     |                   | Total Stars |
|--------------------------|----------------------------------|---------------------------------|-----------------------|------------------------|----------------------------------------------------------------------------|---------------------------|-----------------------------------------------------|-------------------|-------------|
|                          | Is the Case Definition Adequate? | Representativeness of the Cases | Selection of Controls | Definition of Controls | Comparability of Cases and Controls on the Basis of the Design or Analysis | Ascertainment of Exposure | Same Method of Ascertainment for Cases and Controls | Non-Response Rate |             |
| <b>Arem 2011</b>         | 1                                | 1                               | 1                     | -                      | 1                                                                          | -                         | 1                                                   | -                 | 5           |
| <b>Friedenreich 2010</b> | 1                                | 1                               | 1                     | 1                      | 1                                                                          | -                         | 1                                                   | -                 | 6           |
| <b>Matthews 2005</b>     | 1                                | 1                               | 1                     | -                      | 1                                                                          | -                         | 1                                                   | -                 | 5           |
| <b>Moradi 2000</b>       | 1                                | 1                               | 1                     | 1                      | 1                                                                          | 1                         | 1                                                   | -                 | 7           |
| <b>Olson 1997</b>        | 1                                | 1                               | 1                     | 1                      | 1                                                                          | -                         | 1                                                   | 1                 | 7           |
| <b>Shu 1993</b>          | 1                                | 1                               | 1                     | -                      | 1                                                                          | -                         | 1                                                   | -                 | 5           |
| <b>Dosemeci 1993</b>     | -                                | 1                               | -                     | 1                      | 1                                                                          | 1                         | 1                                                   | 1                 | 6           |

Note: A study can be awarded a maximum of one star for each numbered item within the Selection and Exposure categories. A maximum of two stars can be given for Comparability. For comparability in our analysis, a study can be awarded one star for controlling for age; Two stars for also controlling for physical activity.

**Table S7.** Adjusted confounders of the included studies in systematic review.

| Publication  |      | Number of confounders | Adjusted confounders                                                                                                                                                                                                              | How to deal with obesity/BMI (particular attention to potential mediator BMI) |
|--------------|------|-----------------------|-----------------------------------------------------------------------------------------------------------------------------------------------------------------------------------------------------------------------------------|-------------------------------------------------------------------------------|
| Author       | Year |                       |                                                                                                                                                                                                                                   |                                                                               |
| Dosemeci     | 1993 | 3                     | Age, smoking and socioeconomic status (based on income and education levels)                                                                                                                                                      | —                                                                             |
| Shu          | 1993 | 4                     | Age, number of pregnancies, BMI, caloric intake                                                                                                                                                                                   | Adjusted in the multivariate model                                            |
| Zheng*       | 1993 | —                     | Age-specific and sex specific person-years estimated in each occupation category                                                                                                                                                  | —                                                                             |
| Olson        | 1997 | 9                     | Age, education, BMI, diabetes, smoking, parity, age at menarche, menopausal status, and use of unopposed estrogen.                                                                                                                | Adjusted in the multivariate model                                            |
| Moradi*      | 1998 | 4                     | Age at follow-up, place of residence, calendar year of follow-up, and socio-economic status                                                                                                                                       | —                                                                             |
| Moradi       | 2000 | 8                     | Age, parity, age at last birth, BMI 1 year prior to data collection, use of oral contraceptives, use of hormone replacement therapy, smoking, and age at menopause                                                                | Adjusted in the multivariate model                                            |
| Weiderpass   | 2001 | 3                     | Mean number of children, mean age at first birth, and turnover rate                                                                                                                                                               | —                                                                             |
| Furberg      | 2003 | 9                     | age, geographical region, height, BMI, recreational or occupational activity and smoking at baseline and parity. Also considered blood pressure and serum glucose                                                                 | Adjusted in the multivariate model                                            |
| Matthews     | 2005 | 12                    | Age, age at menarche, menopausal status and age, number of pregnancies, oral contraceptive use, current smoking, ever drinking, family history of cancer, education, height, and BMI                                              | Adjusted in the multivariate model                                            |
| Friberg      | 2006 | 9                     | Age in months, parity, history of diabetes, total fruit and vegetable, education, and work/occupation, walking/bicycling, household work, leisure time activity, and leisure time inactivity (watching TV/sitting) simultaneously | Additionally adjusted for BMI                                                 |
| Patel        | 2008 | 9                     | Age, age at menarche, age at menopause, duration of oral contraceptive use, parity, smoking, total caloric intake, personal history of diabetes and postmenopausal hormone therapy use                                            | Additionally adjusted for BMI                                                 |
| Gierach      | 2009 | 7                     | Age, race, smoking status, parity, ever use of oral contraceptives, age at menopause, hormone therapy formulation                                                                                                                 | Additionally adjusted for BMI                                                 |
| Friedenreich | 2010 | 6                     | Age, BMI, waist circumference, age at menarche, hypertension, and number of pregnancies of $\geq 20$ weeks gestation                                                                                                              | Adjusted in the multivariate model                                            |

|    |      |      |   |                                                                                                                                                                                                                                                                                                      |                                    |
|----|------|------|---|------------------------------------------------------------------------------------------------------------------------------------------------------------------------------------------------------------------------------------------------------------------------------------------------------|------------------------------------|
| 1  | Arem | 2011 | 8 | Age, BMI, race, number of live births, menopausal status, oral<br>2 contraceptive use, hypertension, and smoking status                                                                                                                                                                              | Adjusted in the multivariate model |
| 3  |      |      |   | Age, sex, ethnicity, deprivation index, education, fruit and vegetable<br>4 intake, BMI, smoking status, and alcohol intake, hormone therapy use,<br>5 Hunter 2020 15 oral contraceptive use, number of live births, age at menarche, age at<br>6 menopause, hysterectomy status                     | Adjusted in the multivariate model |
| 7  |      |      |   | Age, BMI, weight change since age 20, history of diabetes, history of<br>8 hypertension, age at menarche, menstrual presence, parity, smoking<br>9 Miyata <sup>7</sup> 2020 13 status, alcohol consumption, occupational activity, hours of physical<br>10 exercise, walking, and television viewing | Adjusted in the multivariate model |
| 11 |      |      |   |                                                                                                                                                                                                                                                                                                      |                                    |

---

13 Note: BMI, body mass index. \* studies not included in the meta-analysis.  
14  
15  
16  
17  
18  
19  
20  
21  
22  
23  
24  
25  
26  
27  
28  
29  
30  
31  
32  
33  
34  
35  
36  
37  
38  
39  
40  
41  
42  
43  
44  
45  
46



**Table S8.** Influence analysis of sedentary behaviour and endometrial cancer (given named study is omitted).

| Occupational domain |                   | Leisure-time domain |                   |
|---------------------|-------------------|---------------------|-------------------|
| Study omitted       | Estimate (95% CI) | Study omitted       | Estimate (95% CI) |
| Dosemeci 1993       | 1.23 (1.10, 1.38) | Furberg 2003        | 1.35 (0.93-1.95)  |
| Shu 1993            | 1.22 (1.08, 1.38) | Friberg 2006        | 1.24 (0.86-1.79)  |
| Olson 1997          | 1.24 (1.11, 1.39) | Patel 2008          | 1.31 (0.85-2.03)  |
| Moradi 2000         | 1.19 (1.04, 1.37) | Gierach 2009        | 1.26 (0.86-1.86)  |
| Weiderpass 2001     | 1.19 (1.03, 1.38) | Hunter 2020         | 1.53 (1.24-1.87)  |
| Furberg 2003        | 1.21 (1.08, 1.36) | Miyata 2020         | 1.30 (0.93-1.82)  |
| Matthews 2005       | 1.27 (1.15, 1.40) | Combined            | 1.34 (0.98-1.83)  |
| Friberg 2006        | 1.26 (1.12, 1.41) |                     |                   |
| Friedenreich 2010   | 1.21 (1.06, 1.38) |                     |                   |
| Miyata 2020         | 1.22 (1.11, 1.35) |                     |                   |
| Combined            | 1.22 (1.09, 1.37) |                     |                   |

**Table S9.** Results of meta-regression analyses on individual study characteristics for studies included in the meta-analysis of the association between sedentary behaviour and the risk of endometrial cancer.

| Covariates                        | N  | RR   | 95% CI |      | I <sup>2</sup> | Tau <sup>2</sup> | Ratio of RR | 95% CI    |      | P    |
|-----------------------------------|----|------|--------|------|----------------|------------------|-------------|-----------|------|------|
| Model with no covariates          | 14 | 1.28 | 1.14   | 1.43 | 34.8%          | 0.0000           | -           | -         | -    | -    |
| Domain*                           |    |      |        |      |                |                  |             |           |      |      |
| Total                             | 2  | 1.55 | 1.27   | 1.89 | 29.3%          | 0.0004           | 1.00        | Reference |      |      |
| Occupational                      | 10 | 1.22 | 1.09   | 1.37 |                |                  | 0.80        | 0.60      | 1.07 | 0.12 |
| Leisure-time                      | 6  | 1.34 | 0.98   | 1.83 |                |                  | 0.89        | 0.62      | 1.28 | 0.51 |
| Study design                      |    |      |        |      |                |                  |             |           |      |      |
| Cohort study                      | 7  | 1.33 | 1.13   | 1.58 | 36.8%          | 0.0027           | 1.00        | Reference |      |      |
| Case-control study                | 7  | 1.22 | 1.05   | 1.41 |                |                  | 0.91        | 0.72      | 1.17 | 0.44 |
| Study area                        |    |      |        |      |                |                  |             |           |      |      |
| Asia                              | 4  | 1.20 | 0.78   | 1.83 | 36.0%          | 0.0000           | 1.00        | Reference |      |      |
| Europe                            | 5  | 1.24 | 1.05   | 1.46 |                |                  | 1.14        | 0.78      | 1.68 | 0.47 |
| North America                     | 5  | 1.41 | 1.22   | 1.63 |                |                  | 1.26        | 0.84      | 1.91 | 0.24 |
| Sample size                       |    |      |        |      |                |                  |             |           |      |      |
| < 5000                            | 6  | 1.19 | 1.03   | 1.37 | 32.7%          | 0.0028           | 1.00        | Reference |      |      |
| ≥ 5000                            | 8  | 1.35 | 1.17   | 1.57 |                |                  | 1.15        | 0.90      | 1.47 | 0.24 |
| Number of cases                   |    |      |        |      |                |                  |             |           |      |      |
| < 500                             | 7  | 1.30 | 1.12   | 1.51 | 39.8%          | 0.0036           | 1.00        | Reference |      |      |
| ≥ 500                             | 7  | 1.25 | 1.06   | 1.47 |                |                  | 0.99        | 0.75      | 1.29 | 0.91 |
| Study quality                     |    |      |        | 1.47 |                |                  |             |           |      |      |
| Fair                              | 7  | 1.14 | 0.93   | 1.41 | 33.4%          | 0.0049           | 1.00        | Reference |      |      |
| Good                              | 7  | 1.37 | 1.22   | 1.53 |                |                  | 1.14        | 0.90      | 1.46 | 0.25 |
| Adjustment of confounding factors |    |      |        |      |                |                  |             |           |      |      |
| Not adequate                      | 9  | 1.22 | 1.07   | 1.40 | 35.4%          | 0.0014           | 1.00        | Reference |      |      |
| Adequate                          | 5  | 1.42 | 1.18   | 1.72 |                |                  | 1.13        | 0.85      | 1.50 | 0.36 |
| Adjustment for physical activity  |    |      |        |      |                |                  |             |           |      |      |
| No                                | 11 | 1.25 | 1.10   | 1.42 | 39.1%          | 0.0094           | 1.00        | Reference |      |      |
| Yes                               | 3  | 1.41 | 1.08   | 1.84 |                |                  | 1.10        | 0.78      | 1.55 | 0.55 |
| Adjustment for BMI                |    |      |        |      |                |                  |             |           |      |      |
| No                                | 5  | 1.34 | 1.20   | 1.49 | 37.0%          | 0.0029           | 1.00        | Reference |      |      |
| Yes                               | 9  | 1.21 | 1.01   | 1.46 |                |                  | 0.92        | 0.72      | 1.17 | 0.46 |

Meta-regression models are fitted assuming random effects that allow for between-study variability. I-squared (%) representing variation due to heterogeneity; Tau-squared representing estimate of between-study variance.

\*Number of studies exceeds in total as some research presented risk estimates separately for total sedentary, occupational, leisure-time domain.

# BMJ Open

## The association between domain-specific sedentary behavior and endometrial cancer: A systematic review and meta-analysis

|                                 |                                                                                                                                                                                                                                                                                                                                                                                                                                                                                                                                                                                                                                                                                                                                                                                                                                                                                                                                                                                                                                                                                                                                                                                       |
|---------------------------------|---------------------------------------------------------------------------------------------------------------------------------------------------------------------------------------------------------------------------------------------------------------------------------------------------------------------------------------------------------------------------------------------------------------------------------------------------------------------------------------------------------------------------------------------------------------------------------------------------------------------------------------------------------------------------------------------------------------------------------------------------------------------------------------------------------------------------------------------------------------------------------------------------------------------------------------------------------------------------------------------------------------------------------------------------------------------------------------------------------------------------------------------------------------------------------------|
| Journal:                        | <i>BMJ Open</i>                                                                                                                                                                                                                                                                                                                                                                                                                                                                                                                                                                                                                                                                                                                                                                                                                                                                                                                                                                                                                                                                                                                                                                       |
| Manuscript ID                   | bmjopen-2022-069042.R1                                                                                                                                                                                                                                                                                                                                                                                                                                                                                                                                                                                                                                                                                                                                                                                                                                                                                                                                                                                                                                                                                                                                                                |
| Article Type:                   | Original research                                                                                                                                                                                                                                                                                                                                                                                                                                                                                                                                                                                                                                                                                                                                                                                                                                                                                                                                                                                                                                                                                                                                                                     |
| Date Submitted by the Author:   | 21-Mar-2023                                                                                                                                                                                                                                                                                                                                                                                                                                                                                                                                                                                                                                                                                                                                                                                                                                                                                                                                                                                                                                                                                                                                                                           |
| Complete List of Authors:       | <p>Yuan, Lei ; Tongji University School of Medicine, Clinical Research Center, Shanghai First Maternity and Infant Hospital; The University of Tokyo, Department of Global Health Policy, Graduate School of Medicine Ni, Jingyi; Tongji University School of Medicine, Clinical Research Center, Shanghai First Maternity and Infant Hospital; Hong Kong Baptist University, Department of Mathematics</p> <p>Lu, Wen; Tongji University School of Medicine, Division of Gynecologic Oncology, Department of Gynecology, Shanghai First Maternity and Infant Hospital</p> <p>Yan, Qin; Tongji University School of Medicine, Division of Gynecologic Oncology, Department of Gynecology, Shanghai First Maternity and Infant Hospital</p> <p>Wan, Xiaoping; Tongji University School of Medicine, Division of Gynecologic Oncology, Department of Gynecology, Shanghai First Maternity and Infant Hospital; Tongji University School of Medicine, Shanghai Key Laboratory of Maternal Fetal Medicine, Shanghai First Maternity and Infant Hospital</p> <p>Li, Zhen; Tongji University School of Medicine, Clinical Research Center, Shanghai First Maternity and Infant Hospital</p> |
| <b>Primary Subject Heading</b>: | Epidemiology                                                                                                                                                                                                                                                                                                                                                                                                                                                                                                                                                                                                                                                                                                                                                                                                                                                                                                                                                                                                                                                                                                                                                                          |
| Secondary Subject Heading:      | Epidemiology, Global health                                                                                                                                                                                                                                                                                                                                                                                                                                                                                                                                                                                                                                                                                                                                                                                                                                                                                                                                                                                                                                                                                                                                                           |
| Keywords:                       | Epidemiology < TROPICAL MEDICINE, Gynaecological oncology < GYNAECOLOGY, PUBLIC HEALTH                                                                                                                                                                                                                                                                                                                                                                                                                                                                                                                                                                                                                                                                                                                                                                                                                                                                                                                                                                                                                                                                                                |
|                                 |                                                                                                                                                                                                                                                                                                                                                                                                                                                                                                                                                                                                                                                                                                                                                                                                                                                                                                                                                                                                                                                                                                                                                                                       |

SCHOLARONE™  
Manuscripts



I, the Submitting Author has the right to grant and does grant on behalf of all authors of the Work (as defined in the below author licence), an exclusive licence and/or a non-exclusive licence for contributions from authors who are: i) UK Crown employees; ii) where BMJ has agreed a CC-BY licence shall apply, and/or iii) in accordance with the terms applicable for US Federal Government officers or employees acting as part of their official duties; on a worldwide, perpetual, irrevocable, royalty-free basis to BMJ Publishing Group Ltd ("BMJ") its licensees and where the relevant Journal is co-owned by BMJ to the co-owners of the Journal, to publish the Work in this journal and any other BMJ products and to exploit all rights, as set out in our [licence](#).

The Submitting Author accepts and understands that any supply made under these terms is made by BMJ to the Submitting Author unless you are acting as an employee on behalf of your employer or a postgraduate student of an affiliated institution which is paying any applicable article publishing charge ("APC") for Open Access articles. Where the Submitting Author wishes to make the Work available on an Open Access basis (and intends to pay the relevant APC), the terms of reuse of such Open Access shall be governed by a Creative Commons licence – details of these licences and which [Creative Commons](#) licence will apply to this Work are set out in our licence referred to above.

Other than as permitted in any relevant BMJ Author's Self Archiving Policies, I confirm this Work has not been accepted for publication elsewhere, is not being considered for publication elsewhere and does not duplicate material already published. I confirm all authors consent to publication of this Work and authorise the granting of this licence.

1  
2  
3  
4  
5  
6  
7  
8  
9  
10  
11  
12  
13  
14  
15  
16  
17  
18  
19  
20  
21  
22  
23  
24  
25  
26  
27  
28  
29  
30  
31  
32  
33  
34  
35  
36  
37  
38  
39  
40  
41  
42  
43  
44  
45  
46  
47  
48  
49  
50  
51  
52  
53  
54  
55  
56  
57  
58  
59  
60

# 1        **The association between domain-specific sedentary behavior and** 2        **endometrial cancer: A systematic review and meta-analysis**

3        Lei Yuan<sup>1,2</sup>, Jingyi Ni<sup>1,3</sup>, Wen Lu<sup>4</sup>, Qin Yan<sup>4</sup>, Xiaoping Wan<sup>4,5\*</sup>, Zhen Li<sup>1\*</sup>

4        <sup>1</sup>Clinical Research Center, Shanghai First Maternity and Infant Hospital, Tongji  
5        University School of Medicine, Shanghai, China.

6        <sup>2</sup>Department of Global Health Policy, Graduate School of Medicine, The University of  
7        Tokyo, Tokyo, Japan.

8        <sup>3</sup>Department of Mathematics, Hong Kong Baptist University, Hong Kong, China

9        <sup>4</sup>Division of Gynecologic Oncology, Department of Gynecology, Shanghai First  
10        Maternity and Infant Hospital, Tongji University School of Medicine, Shanghai, China.

11        <sup>5</sup>Shanghai Key Laboratory of Maternal Fetal Medicine, Shanghai First Maternity and  
12        Infant Hospital, School of Medicine, Tongji University, Shanghai, China

13  
14        **Correspondence to:** Xiaoping Wan, Division of Gynecologic Oncology, Department  
15        of Gynecology, Shanghai First Maternity and Infant Hospital, Tongji University School  
16        of Medicine, 2699 West Gaoke Road, Shanghai 201204, China. E-mail:  
17        wanxiaoping@tongji.edu.cn. or Zhen Li, Shanghai First Maternity and Infant Hospital,  
18        Tongji University School of Medicine, 2699 West Gaoke Road, Shanghai 201204,  
19        China. E-mail: [zhen\\_li@tongji.edu.cn](mailto:zhen_li@tongji.edu.cn).

20  
21        \*These authors are co-corresponding authors.

1  
2  
3 **22 Abstract**  
4

5 **23 Objective** Sedentary behavior is associated with increased cancer risk. We aim to  
6  
7  
8 **24** assess the associations of domain-specific and total sedentary behavior with risk of  
9  
10 **25** endometrial cancer, with additional attention paid to potential differences in adjustment  
11  
12 **26** strategy for obesity and physical activity.

13  
14 **27 Design** A systematic review and meta-analysis was conducted in accordance with the  
15  
16  
17 **28** guidelines of Preferred Reporting Items for Systematic Reviews and Meta-Analyses  
18  
19 **29** (PRISMA) and the Meta-analysis of Observational Studies in Epidemiology (MOOSE).

20  
21 **30 Data sources** PubMed, Embase and MEDLINE databases were searched up to 28th  
22  
23  
24 **31** February 2023, supplemented by grey literature searches.

25  
26 **32 Eligibility criteria for selecting studies** Observational human studies evaluating the  
27  
28 **33** association between sedentary behavior and endometrial cancer.

29  
30 **34 Data extraction and synthesis** Two reviewers extracted data and conducted the quality  
31  
32  
33 **35** assessment based on Newcastle-Ottawa Scale (NOS) independently. We used a  
34  
35 **36** random-effects model with inverse variance approach to pool the estimates. The extent  
36  
37 **37** of heterogeneity was quantified with the  $I^2$  statistics.

38  
39 **40 Results** Sixteen studies were included in the systematic review. Fourteen studies  
40  
41  
42 **41** involving 882,686 participants were included in the meta-analysis. The pooled RRs for  
43  
44 **42** high versus low level of overall sedentary behavior was 1.28 [95% confidence interval  
45  
46 **43** (CI): 1.14-1.43;  $I^2=34.8\%$ ]. The increased risk regarding specific domains was 1.22  
47  
48 **44** (95% CI: 1.09-1.37;  $I^2=13.4\%$ ,  $n=10$ ) for occupational domain, 1.34 (95% CI: 0.98-  
49  
50 **45** 1.83;  $I^2=53.7\%$ ,  $n=6$ ) for leisure-time domain, and 1.55 (95% CI: 1.27-1.89;  $I^2=0.0\%$ ,  
51  
52 **46**  $n=2$ ) for total sedentary behavior. Larger pooled RRs were observed among studies  
53  
54 **47** with adjustment for physical activity and studies without adjustment for body mass  
55  
56 **48** index.  
57  
58  
59  
60

1  
2  
3 47 **Conclusions** Higher levels of sedentary behavior, total and occupational sedentary  
4  
5 48 behavior in particular, increase the risk of endometrial cancer. Future studies are needed  
6  
7 49 to verify domain-specific associations based on objective quantification of sedentary  
8  
9 50 behavior, as well as the interaction of physical activity, adiposity and sedentary time on  
10  
11 51 endometrial cancer.  
12  
13  
14  
15  
16  
17  
18  
19  
20  
21  
22  
23  
24  
25  
26  
27  
28  
29  
30  
31  
32  
33  
34  
35  
36  
37  
38  
39  
40  
41  
42  
43  
44  
45  
46  
47  
48  
49  
50  
51  
52  
53  
54  
55  
56  
57  
58  
59  
60

For peer review only

1  
2  
3 52 **Strength and limitation**  
4  
5

6 53 1. The present systematic review and meta-analysis was conducted following the  
7  
8 54 registered proposal, PRISMA and Moose guidelines, and NOS to report results and  
9  
10  
11 55 evaluate study quality, respectively.  
12

13 56 2. Previous studies reported inconsistent associations between sedentary behavior and  
14  
15 57 endometrial cancer.  
16

17 58 3. Little is known regarding the association between specific domains of sedentary  
18  
19 59 behaviour and endometrial cancer, as well as the potential role of obesity and physical  
20  
21 60 activity in the association.  
22  
23

24 61 4. The results would add to the existing evidence by showing a possible domain-specific  
25  
26 62 effect of sedentary behavior on endometrial cancer.  
27  
28

29 63 5. The review highlighted the importance of evaluating the interaction of sedentary  
30  
31 64 behavior with other lifestyle factors when analyzing the association between sedentary  
32  
33 65 behavior and endometrial cancer.  
34  
35  
36  
37  
38  
39  
40  
41  
42  
43  
44  
45  
46  
47  
48  
49  
50  
51  
52  
53  
54  
55  
56  
57  
58  
59  
60



## 66 **Introduction**

67 According to the updated global cancer burden estimates from *Global Cancer*  
68 *Statistics 2020*<sup>1</sup>, endometrial cancer ranks the sixth most common cancer in women  
69 worldwide, and the most common gynecologic cancer in several developed regions,  
70 including the North America, Eastern and Northern Europe. A worrying trend is that,  
71 since the late 1990s, the incidence of endometrial cancer has rapidly increased in  
72 several developing countries during urbanization, including some Asian countries  
73 (Japan, Singapore, China, the Philippines), and South Africa<sup>2</sup>. It is suggested that this  
74 phenomenon may be explained, at least partly, by changing environmental and lifestyle  
75 risk factors in these regions, such as the epidemic of obesity, lack of physical activity,  
76 and long-time sitting<sup>3-4</sup>. Although obesity is a known risk factor for endometrial cancer,  
77 the association between sedentary behavior and endometrial cancer remains largely  
78 unclear. Sedentary behavior includes sitting, reclining or lying behavior characterized  
79 by low energy expenditure<sup>5</sup>. During the past decades, technological innovation has  
80 influenced how people work and spend leisure-time, and has led to inevitably prolonged  
81 sitting time, particularly for desk-based office work and screen-based recreation.  
82 According to *the World Health Organization (WHO) Guidelines on Physical Activity*  
83 *and Sedentary behavior (2020)*, long sedentary time is associated with various  
84 deleterious health outcomes, including all-cause mortality, cardiovascular diseases,  
85 obesity, and more recently total cancer morbidity<sup>5</sup>.

86 Three previous meta-analyses investigating the association between sedentary  
87 behavior and several types of cancers<sup>6-8</sup>, reported a 28% to 36% increased risk of  
88 endometrial cancer among individuals with higher levels of sedentary behavior by  
89 summarizing three to eleven individual studies. However, some evidence on sedentary  
90 behavior and endometrial cancer has not yet been included in existing review and meta-

1  
2  
3 91 analyses, the level of evidence for cancer-specific incidence remains unclear<sup>9-10</sup>. Given  
4  
5 92 inconsistent results reported, an up-to-date review of current evidence is in urge need  
6  
7  
8 93 to clarify the association between sedentary behavior and endometrial cancer risk.  
9

10 94 No distinction in domains of sedentary behavior is a likely source of the  
11  
12 95 discrepancy in previous findings. The *WHO Guidelines 2020* has operationalized the  
13  
14 96 definition of sedentary behavior to further include self-reported sitting that can be  
15  
16 97 assessed in various domains (including leisure-time and occupational domain) and total  
17  
18 98 sedentary behavior.<sup>5</sup> Meanwhile, the association with adverse health outcomes may  
19  
20 99 differ in certain domains of sedentary behavior<sup>11</sup>. It is increasingly recognized that  
21  
22 100 confounding factors may vary greatly across domains of sedentary behavior, and  
23  
24 101 contribute to varied associations with health-related outcomes<sup>12</sup>. For example, while  
25  
26 102 occupational sedentary behavior is related to education and socioeconomic variables,  
27  
28 103 leisure-time sedentary behavior is likely linked to lifestyle factors such as diet and  
29  
30 104 obesity<sup>13</sup>. Moreover, these two domains are often inversely correlated to physical  
31  
32 105 activity. However, current evidence has been derived mostly from studies that have  
33  
34 106 broadly categorized sedentary behavior according to the level of sitting time involved<sup>7</sup>,  
35  
36 107 <sup>14</sup>. Domain-specific analyses, taking account of variability in study characteristics, may  
37  
38 108 help to further clarify the investigated association and to refine the prevention strategy  
39  
40 109 of endometrial cancer.  
41  
42  
43  
44  
45

46 110 Besides, the complex interplay within lifestyle factors, including obesity, physical  
47  
48 111 activity and sedentary behavior, needs to be taken into consideration within the context.  
49  
50 112 Obesity is a known risk factor for endometrial cancer, with a clear dose-response  
51  
52 113 relationship (the higher the body mass index, the greater the risk), detailed documented  
53  
54 114 by the International Agency for Research on Cancer (IARC) working group<sup>15</sup>. Given  
55  
56 115 that prolonged sitting is likely to be related with high BMI, obesity thus may be a  
57  
58  
59  
60

1  
2  
3 116 potential mediator linking sedentary behavior to cancer incidence. Under this  
4  
5 117 circumstance, studies adjusting for BMI as a confounding factor may attenuate the true  
6  
7 118 effects of sedentary behavior when evaluating its impacts on endometrial cancer. A few  
8  
9 119 studies have probably recognized this issue and provided results without and with  
10  
11 120 additional adjustment for BMI<sup>16-19</sup>. In addition, although less evidence presented,  
12  
13 121 similar concerns have been raised with regard to physical activity, which has potential  
14  
15 122 protective effect on cancer risk<sup>4, 20-21</sup>.

16  
17  
18  
19 123 In this systematic review and meta-analysis, the primary aim was to analyze  
20  
21 124 comprehensively the existing studies of the associations between domain-specific  
22  
23 125 (occupational and leisure-time) and total sedentary behavior and endometrial cancer  
24  
25 126 risk, with additional attention paid to potential difference of the findings related to  
26  
27 127 different adjustment strategy for BMI and physical activity.  
28  
29  
30

31 128

## 32 129 **Methods**

33  
34 130 We performed this systematic review and meta-analysis in accordance with the 2020  
35  
36 131 guidance of the Preferred Reporting Items for Systematic Reviews and Meta-Analyses  
37  
38 132 (PRISMA)<sup>22</sup> and guidelines of the Meta-analysis of Observational Studies in  
39  
40 133 Epidemiology (MOOSE) as well<sup>23</sup>. Reported items in this systematic review and meta-  
41  
42 134 analysis strictly followed the checklist of PRISMA 2020 and MOOSE (Table S1, S2).  
43  
44 135 The full review protocol was registered with International prospective register of  
45  
46 136 systematic reviews (PROSPERO) under the registration number CRD 42021246283.  
47  
48  
49

50 137

## 51 138 **Search strategy and selection criteria**

52  
53 139 We conducted a comprehensive literature search of the electronic databases, including  
54  
55 140 Embase, MEDLINE and PubMed. The search was updated on 28 February 2023, and  
56  
57 141 publication language was limited to English. The search combined MeSH heading with  
58  
59  
60

1  
2  
3 142 text search using varied terms related to “sedentary behavior” and “endometrial cancer”.  
4  
5 143 Detailed search terms and strategy used are listed in the [Supplemental Text](#). Terms  
6  
7  
8 144 associated with physical activity and physical inactivity (insufficient or low levels of  
9  
10 145 physical activity) were also searched since some sedentary behavior studies were  
11  
12 146 conducted in the name of physical activity. In addition, we screened and manually  
13  
14 147 checked reference lists from selected articles and relevant reviews to identify other  
15  
16  
17 148 potentially eligible studies.

19 149 The inclusion criteria for the studies included in the systematic review are listed  
20  
21 150 as follows: (1) observational human study that published in English; (2) evaluated the  
22  
23 151 association between sedentary behavior (total sitting time, leisure-time sedentariness  
24  
25 152 including sitting, television or screen viewing, and occupational sedentary behavior)  
26  
27  
28 153 and incidence of endometrial cancer. Apart from all criteria for systematic review, the  
29  
30 154 studies further included in the meta-analysis should also meet the following criteria:  
31  
32 155 report a relative risk (RR), odds ratio (OR), hazard ratio (HR) or standardized incidence  
33  
34 156 ratio (SIR) with 95% confidence interval (CI) for highest versus lowest level of  
35  
36 157 sedentary behavior, or provide sufficient data to calculate them.

39  
40 158 Studies were excluded if they were published as conference abstracts or papers,  
41  
42 159 letters and short surveys. We also excluded studies for physical activity that used terms  
43  
44 160 “sedentary” or “sitting” to represent the lowest or reference level of physical activity  
45  
46  
47 161 categories.

### 51 163 **Data extraction and quality assessment**

53  
54 164 Two authors (Lei Yuan and JingYi Ni) independently performed the literature search  
55  
56 165 and reviewed potential studies in compliance with the selection criteria. The  
57  
58 166 disagreements were resolved through discussion. The authors were contacted by e-mail  
59  
60

1  
2  
3 167 for full text or additional information when needed. Extracted information from each  
4  
5 168 study included: (a) name of the first author and publication year; (b) study design; (c)  
6  
7 169 study area; (d) enrollment period for cohort study, or study period for case-control study;  
8  
9 170 (e) age at baseline; (f) follow-up length for cohort study; (g) study population; (h)  
10  
11 171 sample size; (i) case number; (j) sedentary behavior type and its assessment; (k)  
12  
13 172 diagnostic criteria of EC, and if available, its specific cancer classification; (l) results  
14  
15 173 and if possible, reported risk estimates and their 95% CI; (m) adjusted covariates, if  
16  
17 174 possible, particular attention to adjustment for body mass index (BMI), and physical  
18  
19 175 activity.

20  
21  
22  
23  
24 176 In the main analysis, we prioritized risk estimates that were adjusted for physical  
25  
26 177 activity, and unadjusted for BMI in studies with a separate step of BMI adjustment, or  
27  
28 178 other adiposity-related factors when available, due to potential intermediate role of  
29  
30 179 obesity. If study populations overlapped between included studies, we selected the  
31  
32 180 article that contained the most comprehensive data<sup>24-25</sup>.

33  
34  
35 181 Quality assessment of the studies included in the meta-analysis was assessed based  
36  
37 182 on the validated Newcastle-Ottawa Scale (NOS) for observational studies<sup>26-27</sup>, where  
38  
39 183 each study was evaluated based on three categories: participant selection (four items,  
40  
41 184 one star for each item); comparability of study groups (one item, up to two stars);  
42  
43 185 exposure or outcome assessment (three items, one star for each item). Thus, a study can  
44  
45 186 be awarded up to a maximum of nine stars<sup>27</sup>. We used the comparability category of  
46  
47 187 the NOS to determine whether the crucial confounders had been adjusted, that is, the  
48  
49 188 study can be awarded one star for adjusting for age, two stars for also controlling for  
50  
51 189 physical activity. The quality of the study was classified as poor ( $\leq 4$  stars), fair (4-6  
52  
53 190 stars), and good ( $\geq 7$  stars). We also extracted confounders adjusted by each study, and  
54  
55 191 evaluated whether the study had adequate adjustment for potential confounders, that is,  
56  
57  
58  
59  
60

1  
2  
3  
4  
5  
6  
7  
8  
9  
10  
11  
12  
13  
14  
15  
16  
17  
18  
19  
20  
21  
22  
23  
24  
25  
26  
27  
28  
29  
30  
31  
32  
33  
34  
35  
36  
37  
38  
39  
40  
41  
42  
43  
44  
45  
46  
47  
48  
49  
50  
51  
52  
53  
54  
55  
56  
57  
58  
59  
60

192 adjustment for at least five of seven confounders: age; diabetes, blood glucose;  
193 hypertension, blood pressure; age at menarche, menopausal status and age, parity;  
194 smoking; oral use of contraceptives, use of hormone replacement therapy; and physical  
195 activity<sup>28</sup>.

196

### 197 **Statistical analysis**

198 Given underlying methodological heterogeneity across studies including study design,  
199 participants' characteristics, and adjusted confounders, random effects models were  
200 applied to summarize domain-specific (occupational and leisure-time), and total RRs  
201 and their 95% CIs for the highest level versus the lowest level of sedentary behavior,  
202 regardless of whether statistically significant heterogeneity was found. The highest and  
203 lowest values were defined by individual studies with different underlying definitions  
204 and different measurements of sedentary behavior. Detailed definition and assessment  
205 of sedentary behavior in individual study were summarized in Table S3. The natural  
206 logarithms of the study-specific RR and corresponding standard errors were calculated  
207 using the inverse variance approach<sup>29</sup>. Employing random effects models, the RR of  
208 each study was weighted using random effects weights and was further combined to  
209 obtain an overall estimate. When studies reported subgroup-specific results such as  
210 estimates of different calendar periods, we fitted a fixed effects model to combine the  
211 separate results to obtain the overall estimates for the main analysis<sup>25</sup>. For studies not  
212 using the lowest category as the reference category of sedentary behavior<sup>9-10, 17, 30-31</sup>, we  
213 used the method by Hamling to recalculate the estimates through changing the lowest  
214 category as the reference category<sup>32</sup>. We used the  $I^2$  statistics to test for heterogeneity  
215 between included studies.  $I^2$  values of more than 25%, 50%, 75% were deemed to  
216 indicate low, moderate and high level of statistically significant heterogeneity,

1  
2  
3 217 separately. Potential publication bias was assessed by inspection of funnel plots, and  
4  
5 218 further evaluated using Egger's regression test as well as Begg's correlation test.  
6  
7  
8 219 Asymmetry in the funnel plots or  $p$  value  $< 0.1$  indicated publication bias.  
9

10 220 Subgroup analyses were performed according to study design (cohort study, case-  
11  
12 221 control study), study area (Asia, Europe and North America), sample size ( $\geq 5,000$ , and  
13  
14 222  $< 5,000$ ), number of cases ( $\geq 500$ , and  $< 500$ ), study quality (good, fair, poor), and  
15  
16  
17 223 adjustment for potential confounding factors (adequate, not adequate). In addition,  
18  
19 224 sedentary behavior, obesity and physical activity are lifestyle factors that are complexly  
20  
21  
22 225 associated and interacted. As obesity potentially mediates the association between  
23  
24 226 sedentary behavior and endometrial cancer risk, in which case the adjustment for BMI  
25  
26 227 would over adjust the association, we conducted subgroup analyses stratified by  
27  
28 228 whether BMI was adjusted<sup>28</sup>. Similarly, we also conducted subgroup analyses by  
29  
30  
31 229 whether adjusting for physical activity.  
32

33 230 Associations with total sedentary behavior were reported in only two studies.  
34  
35 231 Therefore, we also included all studies in the analysis to assess the effects of overall  
36  
37  
38 232 sedentary behavior. If a study reported results at a specific domain, we extracted the  
39  
40 233 results as the nearest estimate for overall sedentariness. If a study reported results at  
41  
42 234 multiple domains, we used fixed effects models to combine the separate results to  
43  
44 235 obtain the overall estimates as the total level. Random-effects meta-regression analyses  
45  
46 236 were then conducted to explore whether the estimates differed by main characteristics  
47  
48 237 of the included study. The analyses were unavailable for domain-specific sedentary  
49  
50  
51 238 behavior analysis due to limited number of studies ( $n \leq 10$ ). The Tau-squared was used  
52  
53  
54 239 to evaluate between-study variance of each covariate.  
55

56 240 We also performed sensitivity analyses to test the robustness of the results in the  
57  
58 241 main analysis. We firstly conducted analyses by omitting one study at each time to  
59  
60

1  
2  
3 242 recalculate the pooled results to ensure the stability of the results. Secondly, we fitted  
4  
5 243 the trim-and-fill analysis to inspect the impact of publication bias correction on the  
6  
7  
8 244 pooled outcomes. The statistical analyses were performed using Stata 12.0 software  
9  
10 245 (Stata Corp, College Station, TX, USA). A two-tailed  $p$  value  $< 0.05$  was deemed  
11  
12 246 statistically significant.  
13

14  
15 247

## 16 17 248 **Patient and Public Involvement**

18  
19 249 This issue is not applicable to our research since the data collected in this study is  
20  
21 250 secondary data without any personal information and not transferable.  
22

23  
24 251

## 25 252 **Results**

### 26 27 253 **Studies retrieved and characteristics**

28  
29 254 Our initial search identified 749 records. After screening and selection ([Figure 1](#)),  
30  
31 255 sixteen studies were included in the systematic review of sedentary behavior and risk  
32  
33 256 of endometrial cancer. The main characteristics of the included studies are shown in  
34  
35 257 [Table 1](#). Of these sixteen studies, six were from Europe<sup>9, 17, 24-25, 31, 33</sup>, five from Asia<sup>10,</sup>  
36  
37 258 <sup>16, 34-36</sup> and five from North America<sup>18-19, 30, 37-38</sup>. All included studies assessed self-  
38  
39 259 reported sedentary levels based on questionnaires, interviews, or occupations ([Table](#)  
40  
41 260 [S4](#)). Detailed data and characteristics of study participants, diagnostic criteria of the  
42  
43 261 outcome, and the assessment of sedentary behavior are provided in [Table S3](#), [S4](#).  
44  
45  
46  
47  
48  
49  
50  
51  
52  
53  
54  
55  
56  
57  
58  
59  
60



**Table 1.** Study characteristics of the included studies in systematic review.

| Publication                            | Study design          | Study area | Enrolment / Study period | Age at baseline (years) | Subject (controls/cases)                     | Sedentary behavior                               | Results                                                                                                                          | NOS study quality |
|----------------------------------------|-----------------------|------------|--------------------------|-------------------------|----------------------------------------------|--------------------------------------------------|----------------------------------------------------------------------------------------------------------------------------------|-------------------|
| Dosemeci et al. (1993) <sup>34</sup>   | Case-control study    | Turkey     | 1979-1984                | —                       | 275/31                                       | Occupational sedentary                           | OR (sedentary > 6 hr/d) = 0.50 (0.10, 4.40)                                                                                      | Fair (6)          |
| Shu et al. (1993) <sup>16</sup>        | Case-control study    | China      | 1988-1990                | 18-74                   | 536/268                                      | Occupational sedentary                           | OR = 1.20 (0.70, 2.00)                                                                                                           | Fair (5)          |
| Zheng et al. (1993) <sup>35*</sup>     | Cross-sectional study | China      | 1980-1984                | ≥ 30                    | 452/452                                      | Occupational sedentary                           | SIR (long sitting time) = 110                                                                                                    | —                 |
| Olson et al. (1997) <sup>30</sup>      | Case-control study    | US         | 1986-1991                | 40-85                   | 631/232                                      | Occupational sedentary                           | OR = 0.93 (0.55, 1.56)                                                                                                           | Good (7)          |
| Moradi et al. (1998) <sup>24*</sup>    | Cohort study          | Sweden     | 1960                     | 16-95                   | Sub-cohort A (1960):<br>704904/4462          | Occupational sedentary                           | RR (1960) = 1.13 (0.99, 1.29)                                                                                                    | —                 |
|                                        |                       |            | 1970                     |                         | Sub-cohort B (1970):<br>982270/5287          |                                                  | RR (1970) = 1.32 (1.17, 1.50)                                                                                                    |                   |
| Moradi et al. (2000) <sup>25</sup>     | Case-control study    | Sweden     | 1960 and 1970            | 50-74                   | Sub-cohort C (1960 and 1970):<br>253336/1949 | Occupational sedentary                           | RR (1960 and 1970) = 1.30 (1.03, 1.65)                                                                                           | Good (7)          |
|                                        |                       |            | 1994-1995                |                         | 3368/709                                     |                                                  | OR (1960) = 1.30 (0.80, 2.20)<br>OR (1970) = 1.20 (0.80, 1.90)<br>OR (1980) = 1.40 (1.00, 1.90)<br>OR (1990) = 1.30 (0.90, 1.90) |                   |
| Weiderpass et al. (2001) <sup>33</sup> | Cohort study          | Finland    | 1970                     | 25-64                   | 413877/2833                                  | Occupational sedentary                           | RR (high level of sedentary work) = 1.30 (1.10, 1.50)                                                                            | Fair (5)          |
| Furberg et al. (2003) <sup>31</sup>    | Cohort study          | Norway     | 1974-1981                | 20-49                   | 24460/130                                    | Leisure-time sedentary<br>Occupational sedentary | RR (Grade1-sedentary activity) = 1.27 (0.69, 2.32)<br>RR (Grade1-sedentary work) = 1.64 (0.95, 2.84)                             | Good (9)          |
| Matthews et al. (2005) <sup>36</sup>   | Case-control study    | China      | 1997-2001                | 30-69                   | 846/832                                      | Occupational sedentary                           | OR (Sitting Q4) = 0.93 (0.67, 1.30)                                                                                              | Fair (5)          |

**Table 1.** Study characteristics of the included studies in systematic review (Continued).

| Publication                              | Study design       | Study area | Enrolment / Study period | Age at baseline (years)     | Subject (controls)/cases | Sedentary behavior     | Results                                                                                                                                                                           | NOS study quality |
|------------------------------------------|--------------------|------------|--------------------------|-----------------------------|--------------------------|------------------------|-----------------------------------------------------------------------------------------------------------------------------------------------------------------------------------|-------------------|
| Friberg et al. (2006) <sup>17</sup>      | Cohort study       | Sweden     | 1997                     | 50-83                       | 33723/199                | Occupational sedentary | RR (work/occupation activity, low, mostly sitting down and sitting down more than half of the time) = 1.03 (0.76, 1.39); Additional adjustment for BMI: RR = 0.99 (0.73, 1.34)    | Good (8)          |
|                                          |                    |            |                          |                             |                          | Leisure-time sedentary | RR (watching TV/sitting, high, $\geq 5$ hr/d) = 1.80 (1.14, 2.83); Additional adjustment for BMI: RR = 1.66 (1.05, 2.61)                                                          |                   |
| Patel et al. (2008) <sup>18</sup>        | Cohort study       | US         | 1992                     | 50-74                       | 42672/466                | Leisure-time sedentary | RR (sitting $\geq 6$ hr/day) = 1.40 (1.03, 1.89); Additional adjustment for BMI: RR = 1.18 (0.87, 1.59)                                                                           | Good (7)          |
| Gierach et al. (2009) <sup>19</sup>      | Cohort study       | US         | 1995-1996                | 50-71                       | 70351/650                | Leisure-time sedentary | RR ( $\geq 7$ hr) = 1.66 (1.20, 2.88); Additional adjustment for BMI: RR = 1.21 (0.87, 1.67)                                                                                      | Good (7)          |
|                                          |                    |            |                          |                             |                          | Total sedentary        | RR ( $\geq 7$ hr) = 1.56 (1.22, 1.99); Additional adjustment for BMI: RR = 1.26 (0.99, 1.62)                                                                                      |                   |
| Friedenreich et al. (2010) <sup>37</sup> | Case-control study | Canada     | 2002-2006                | 30-79                       | 1032/542                 | Occupational sedentary | OR (Lifetime occupational sedentary activity, $> 16.94$ hr/wk/yr) = 1.28 (0.89, 1.83)                                                                                             | Fair (6)          |
| Arem et al. (2011) <sup>30</sup>         | Case-control study | US         | 2004-2008                | cases: 61.1; controls: 62.1 | 662/667                  | Total sedentary        | OR ( $\geq 8$ hr/d) = 1.52 (1.07, 2.16)                                                                                                                                           | Fair (5)          |
| Hunter et al. (2020) <sup>9</sup>        | Cohort study       | UK         | 2006-2010                | 40-69                       | 253171/872               | Leisure-time sedentary | HR (daily TV viewing time, $> 5$ h) = 0.59 (0.40, 0.88)<br>HR (daily computer use time, $> 3$ h) = 0.82 (0.55, 1.22)<br>HR (daily total screen time, $> 8$ h) = 0.57 (0.31, 1.03) | Fair (6)          |
| Miyata et al. (2021) <sup>10</sup>       | Cohort study       | Japan      | 1988-1990                | 40-79                       | 33801/79                 | Leisure-time sedentary | HR (TV viewing, $\geq 4$ hr/d) = 2.10 (0.57, 7.71)                                                                                                                                | Good (8)          |
|                                          |                    |            |                          |                             |                          | Occupational sedentary | HR (Occupational activity, mainly sitting) = 2.17 (1.04, 4.56)                                                                                                                    |                   |

\*Not included in the meta-analysis and NOS study quality assessment; Table values are mean (SD) for continuous variables.

For peer review only - <http://bmjopen.bmj.com/site/about/guidelines.xhtml>

1  
2  
3 263 The meta-analysis included fourteen studies after excluding two studies, in which  
4  
5 264 one failed to provide 95% CI for risk estimates<sup>35</sup> and the other one was based on less  
6  
7 265 comprehensive data among overlapped study participants<sup>24</sup>. In total, 882,686  
8  
9 266 participants from seven cohort studies and seven case-control studies were involved. In  
10  
11 267 the meta-analysis, two studies (71,680 participants, [Table 1](#)) investigated the  
12  
13 268 association between total sedentary behavior and risk of endometrial cancer, ten studies  
14  
15 269 (515,163 participants) investigated the association with the assessment of occupational  
16  
17 270 sedentary behavior and six studies (458,178 participants) with the assessment of  
18  
19 271 leisure-time sedentariness. Three studies (91,984 participants) have adjusted for  
20  
21 272 physical activity. Nine studies (321,757 participants) have adjusted for BMI in the  
22  
23 273 multivariate model, and three studies (146,746 participants) took a separate step for  
24  
25 274 additional BMI adjustment. Based on the Newcastle-Ottawa quality assessment scale<sup>27</sup>,  
26  
27 275 seven studies were evaluated as having fair quality, and seven as having good quality.  
28  
29 276 Detailed information on the NOS quality assessment of meta-analysed studies is  
30  
31 277 provided in [Table S5](#), [S6](#). Details of confounders adjusted by each study are presented  
32  
33 278 in [Table S7](#).

279

### 280 **Occupational sedentary behavior**

281 Twelve studies have investigated impacts of sedentary behavior during work on  
282 endometrial cancer, and five of them reported statistically significant association  
283 between occupational sedentary behavior and increased risk of endometrial cancer<sup>10, 24-  
284 25, 33, 35</sup>. However, seven studies did not observe a similar significant effect<sup>16-17, 30-31, 34,  
285 36-37</sup>. Among these studies, the meta-analysis for occupational domain included ten  
286 eligible studies, involving 515,163 participants and 5,855 cases. The summary RR for  
287 high versus low occupational sedentary level was 1.22 (95% CI: 1.09-1.37,  $p < 0.01$ ;

1  
2  
3 288  $I^2=13.4\%$ ,  $p_{\text{Heterogeneity}}=0.30$ ) (Figure 2). Consistent with the inspection of the funnel  
4  
5  
6 289 plot, the results of Begg's test ( $p=0.72$ ) and Egger's test ( $p=0.59$ ) suggested no  
7  
8 290 publication bias (Figure 3A).

9  
10 291 The adverse effects of occupational sedentary behavior on endometrial cancer  
11  
12 292 incidence persisted in nearly all subgroup analyses stratified by study design, study area,  
13  
14 293 number of participants and cases, study quality, adjustment for confounders including  
15  
16 294 BMI, and physical activity (Figure 2). The association between occupational sedentary  
17  
18 295 behavior and endometrial cancer was stronger among studies that were cohort study  
19  
20 296 ( $RR_{\text{Summary}}=1.30$ , 95% CI: 1.05-1.62,  $p=0.02$ ;  $I^2=37.2\%$ ,  $p_{\text{Heterogeneity}}=0.19$ ), studies  
21  
22 297 conducted in European areas ( $RR_{\text{Summary}}=1.28$ , 95% CI: 1.14-1.43,  $p<0.01$ ;  $I^2=0.0\%$ ,  
23  
24 298  $p_{\text{Heterogeneity}}=0.41$ ), studies with large number of participants ( $\geq 5000$ ;  $RR_{\text{Summary}}=1.30$ ,  
25  
26 299 95% CI: 1.05-1.62,  $p=0.02$ ;  $I^2=37.2\%$ ,  $p_{\text{Heterogeneity}}=0.19$ ) or cases ( $\geq 500$ ;  
27  
28 300  $RR_{\text{Summary}}=1.25$ , 95% CI: 1.10-1.42,  $p<0.01$ ;  $I^2=16.7\%$ ,  $p_{\text{Heterogeneity}}=0.31$ ), and studies  
29  
30 301 with good quality ( $RR_{\text{Summary}}=1.25$ , 95% CI: 1.01-1.56,  $p=0.04$ ;  $I^2=35.4\%$ ,  $p_{\text{Heterogeneity}}=$   
31  
32 302 0.19). There was moderate heterogeneity in the studies with adequate adjustment and  
33  
34 303 with physical activity adjustment (adequate adjustment for confounders:  $I^2=50.3\%$ ,  
35  
36 304  $p_{\text{Heterogeneity}}=0.13$ ; adjustment for physical activity:  $I^2=57.0\%$ ,  $p_{\text{Heterogeneity}}=0.10$ ).  
37  
38 305 Compared with studies without adequate adjustment or physical activity adjustment,  
39  
40 306 the associations observed in these two groups were slightly attenuated, showing greater  
41  
42 307 estimates and wider confidence intervals. There was only one study adjusting for BMI  
43  
44 308 separately<sup>17</sup>, and no statistically significant risk estimates were exhibited before and  
45  
46 309 after adjustment (before adjustment:  $RR=1.03$ , 95% CI: 0.76-1.39; after adjustment:  
47  
48 310  $RR=0.99$ , 95% CI: 0.73-1.34).

49  
50 311 The sensitivity analyses suggested that the association between occupational  
51  
52 312 sedentary behavior and endometrial cancer risk did not change when recalculating the  
53  
54  
55  
56  
57  
58  
59  
60

1  
2  
3 313 pooled estimates by omitting one study at a time (Table S8). After excluding the most  
4  
5 314 influential research, the summarized RR ranged from 1.19 (95% CI: 1.04-1.37) when  
6  
7 315 excluding the study conducted by Moradi et al. to 1.27 (95% CI: 1.15-1.40) when  
8  
9 316 excluding the study by Matthews et al.<sup>25,36</sup>.

10  
11  
12 317

### 13 14 15 318 **Leisure-time sedentary behavior**

16  
17 319 Six prospective cohort studies (458,178 participants, 2,396 cases) have assessed the  
18  
19 320 relationship between endometrial cancer and time spent sitting outside of work,  
20  
21 321 including watching television (TV), videos or computer, reading, and other sedentary  
22  
23 322 activities. Three of these studies found statistically significant associations between  
24  
25 323 leisure-time sedentary behavior and risk of endometrial cancer<sup>17-19</sup>, and the rest  
26  
27 324 indicated non-statistically significant associations<sup>9-10,31</sup>. The pooled RR for high versus  
28  
29 325 low level of leisure-time sedentary behavior was 1.34 (95% CI: 0.98-1.83,  $p=0.07$ ;  
30  
31 326  $I^2=53.7%$ ,  $p_{\text{Heterogeneity}}=0.06$ ), with moderate and non-statistically significant  
32  
33 327 heterogeneity (Figure 4). However, these results seemed to be driven by a large study  
34  
35 328 (253,171 participants, 872 cases) that reported inconsistent results with other studies  
36  
37 329 (RR=0.57, 95% CI: 0.31-1.03)<sup>9</sup>. After excluding this study, no potential heterogeneity  
38  
39 330 remained in the analysis, and the summarized association between leisure-time  
40  
41 331 sedentary behavior and endometrial cancer turned out to be statistically significant  
42  
43 332 (RR<sub>Summary</sub>=1.53, 95% CI: 1.24-1.87,  $p<0.01$ ;  $I^2=0.0%$ ,  $p_{\text{Heterogeneity}}=0.82$ ). No evidence  
44  
45 333 of publication bias was revealed according to visual inspection of the funnel plot,  
46  
47 334 Begg's test ( $p=0.85$ ), or Egger's test ( $p=0.78$ ) (Figure 3B).

48  
49  
50  
51  
52  
53  
54 335 In subgroup analyses, the significance of the associations across the stratified  
55  
56 336 groups also appeared to be driven by the study reported by Hunter et al. Statistically  
57  
58 337 significant positive associations were observed among studies in North America  
59  
60

1  
2  
3 338 (RR<sub>Summary</sub>=1.48, 95% CI: 1.15-1.90,  $p<0.01$ ;  $I^2=0.0\%$ ,  $p_{\text{Heterogeneity}}=0.53$ ), studies with  
4  
5 339 good quality (RR<sub>Summary</sub>=1.53, 95% CI: 1.24-1.87,  $p<0.01$ ;  $I^2=0.0\%$ ,  $p_{\text{Heterogeneity}}=0.82$ ),  
6  
7 340 studies with small number of cases (RR<sub>Summary</sub>=1.49, 95% CI: 1.18-1.87,  $p<0.01$ ;  
8  
9  $I^2=0.0\%$ ,  $p_{\text{Heterogeneity}}=0.72$ ), studies without adjustment for BMI (RR<sub>Summary</sub>=1.55, 95%  
10  
11 CI: 1.24-1.93,  $p<0.01$ ;  $I^2=0.0\%$ ,  $p_{\text{Heterogeneity}}=0.62$ ) and studies adjusted for physical  
12  
13 342 activity (RR<sub>Summary</sub>=1.62, 95% CI: 1.14-2.30,  $p=0.01$ ;  $I^2=0.0\%$ ,  $p_{\text{Heterogeneity}}=0.61$ ). In  
14  
15 343 three studies with additional adjustment for BMI, despite a decreased effect size, the  
16  
17 344 association remained significant after adjusting for BMI (before adjustment:  
18  
19 RR<sub>Summary</sub>=1.55, 95% CI: 1.24-1.93,  $p<0.01$ ;  $I^2=0.0\%$ ,  $p_{\text{Heterogeneity}}=0.62$ , versus, after  
20  
21 346 adjustment: RR<sub>Summary</sub>=1.27, 95% CI: 1.04-1.55,  $p=0.02$ ;  $I^2=0.0\%$ ,  $p_{\text{Heterogeneity}}=0.44$ )  
22  
23  
24  
25

26 348 In sensitivity analyses, after excluding the most influential research, the summary  
27  
28 349 RRs ranged from 1.24 (95% CI: 0.86-1.79) when excluding the study conducted by  
29  
30 350 Friberg et al. to 1.53 (95% CI: 1.24-1.87) after excluding the study by Hunter et al.<sup>9, 17</sup>  
31  
32 (Table S8).  
33  
34  
35  
36  
37

### 38 353 **Total sedentary behavior**

39  
40 354 Two studies from the US, one large cohort study<sup>19</sup>, and one case-control study<sup>38</sup>,  
41  
42 355 including 71,680 participants and 1,317 cases in total, have investigated the effect of  
43  
44 356 total sedentary behavior (evaluated as total time spent sitting during a 24-hour day) on  
45  
46 357 endometrial cancer risk, and both proved significantly adverse effect. The pooled RR  
47  
48 358 for high versus low analysis of total sedentary behavior and endometrial cancer risk  
49  
50 was 1.55 (95% CI: 1.27-1.89,  $p<0.01$ ;  $I^2=0.0\%$ ,  $p_{\text{Heterogeneity}}=0.91$ ) (Figure 5). After  
51  
52 359 combining all included studies as evaluating overall sedentary behavior, the pooled RR  
53  
54 360 for high versus low analysis was 1.28 (95% CI: 1.14-1.43,  $p<0.01$ ;  $I^2=34.8\%$ ,  
55  
56 361  $p_{\text{Heterogeneity}}=0.10$ ) (Figure 5). No evidence of publication bias was indicated through  
57  
58  
59 362  
60

1  
2  
3 363 visual inspection of the funnel plot ([Figure 3C](#)), which was supported by Begg's test  
4  
5 364 ( $p=0.38$ ), and Egger's test ( $p=0.29$ ).  
6  
7

8 365 The meta-regression analyses showed that all pre-specified study characteristics  
9  
10 366 explained little of the heterogeneity for overall sedentary behavior ([Table S9](#)). There  
11  
12 367 was weak evidence that associations were stronger for cohort studies, studies conducted  
13  
14 368 in North America, studies with large sample size ( $n \geq 5,000$ ), good quality and adequate  
15  
16 369 adjustment of confounding factors as well as adjustment for physical activity ([Figure](#)  
17  
18  
19 370 [5](#)).  
20  
21  
22  
23  
24  
25  
26  
27  
28  
29  
30  
31  
32  
33  
34  
35  
36  
37  
38  
39  
40  
41  
42  
43  
44  
45  
46  
47  
48  
49  
50  
51  
52  
53  
54  
55  
56  
57  
58  
59  
60



## 371 Discussion

372 In this systematic review and comprehensive meta-analysis, 55% increased risk of  
373 endometrial cancer was observed among individuals with higher levels of total  
374 sedentary behavior (RR=1.55, 95% CI: 1.27-1.89), 22% among those with occupational  
375 sedentary behavior (RR=1.22, 95% CI: 1.09-1.37), and 34% with borderline  
376 significance among those with leisure-time sedentary behavior (RR=1.34, 95% CI:  
377 0.98-1.83). The overall increased risk disregarding specific domains was 27%  
378 (RR=1.28, 95% CI: 1.14-1.43). The pooled associations were consistent within  
379 subgroups stratified according to study design, sample size, and adjustment strategy for  
380 physical activity and BMI.

381 The present results added to the existing evidence by showing a possible domain-  
382 specific association between sedentary behavior and endometrial cancer, particularly  
383 for total and occupational domain. Subgroup analyses were generally supportive of the  
384 overall estimates. Our results are partially in line with three previous meta-analyses that  
385 focused on effect of sedentary behavior on all-site cancers<sup>6-8</sup>. Including eight studies,  
386 Schmid et al.<sup>6</sup> reported a 36% increased risk of endometrial cancer among participants  
387 with higher levels of overall sedentary behavior. However, this research did not find a  
388 statistically significant association for occupational domain, which could be attributed  
389 to the limited number of studies included (n=4) and their heterogeneous quality.  
390 Including three prospective studies, Shen et al.<sup>7</sup> reported a 66% increased risk of  
391 endometrial cancer for the defined sedentary behavior that was assessed by total sitting  
392 and TV viewing time. With limited number of studies included, this research did not  
393 discuss on potential heterogeneity of the studies. The most recent meta-analysis was an  
394 umbrella review based on eleven case-control and cohort studies, their results showed  
395 that higher overall sedentary behavior was associated with a 29% higher risk of



1  
2  
3 396 endometrial cancer<sup>8</sup>. Moreover, differences in geographic region and study design were  
4  
5 397 found to have larger impacts on the results. However, caution is needed when  
6  
7 398 interpreting their findings, as the investigated outcomes were more than one specific  
8  
9 399 site, and the authors called into attention the importance of adjusting for obesity in the  
10  
11 400 context, which could be misleading given its mediating role. Our research found that  
12  
13 401 the positive associations between sedentariness and endometrial cancer were more  
14  
15 402 pronounced in studies with high quality, prospective design and large sample size.  
16  
17 403 These studies were more prone to reveal the true association between sedentary  
18  
19 404 behavior and endometrial cancer by reducing possibility of misclassification and  
20  
21 405 selection, recall, and confounding bias.  
22  
23  
24  
25

26 406 While we found a statistically significant increased risk of endometrial cancer  
27  
28 407 related to higher levels of occupational sedentary behavior, the results related to leisure-  
29  
30 408 time sedentary behavior was borderline significant. Possible explanations for domain-  
31  
32 409 specific differences may be attributed to changes of sedentary behavior over time,  
33  
34 410 susceptible population, and exposure window across the life span<sup>12</sup>. Compared with  
35  
36 411 leisure-time sedentary behavior, occupational sedentary behavior is more frequently  
37  
38 412 and closely associated with stable biological accumulation of early-onset and long-term  
39  
40 413 exposure of prolonged, uninterrupted sitting<sup>39</sup>. Moreover, leisure-time sedentary  
41  
42 414 behavior interacts in a complex way with other lifestyle factors, such as diet, physical  
43  
44 415 activity, and obesity in association with health outcomes<sup>13</sup>. Failure to account for these  
45  
46 416 factors in research is likely to yield biased results. Besides, the domain-specific  
47  
48 417 differences may be explained, at least partly, by the small number as well as  
49  
50 418 heterogeneity of studies within leisure-time domain, in which the pooled estimates were  
51  
52 419 dominated by a study with a large sample size showing contrasting findings<sup>9</sup>. Further  
53  
54 420 longitudinal studies incorporating the measures of different domains are needed to  
55  
56  
57  
58  
59  
60

1  
2  
3 421 better clarify the domain-specific association and the difference across domains.  
4

5 422 Subgroup-analyses suggested greater effect size in studies with adjustment for  
6  
7 423 physical activity. Emerging evidence has shown that the sedentary behavior is distinct  
8  
9 424 from lack of physical activity because of its unique postural and intervenable health  
10  
11 425 hazards effects that cannot be offset by physical activity<sup>40</sup>. Without proper adjustment  
12  
13 426 for physical activity, the real correlation between sedentary behavior and endometrial  
14  
15 427 cancer could be attenuated due to the role of physical activity in reducing cancer risk  
16  
17 428 by healthy body weight maintenance and obesity prevention<sup>12, 41</sup>. However, most  
18  
19 429 included studies in the analysis did not adjust for physical activity. Our findings  
20  
21 430 highlight the importance of considering the interactive effects of sedentary behavior  
22  
23 431 and other lifestyle factors may have on endometrial cancer in future studies. Novel  
24  
25 432 analytical methods, such as marginal structural models with time-varying exposure  
26  
27 433 assessment, may be particularly important in evaluating the interactive effects of  
28  
29 434 sedentary behavior, physical activity and obesity in association with endometrial cancer,  
30  
31 435 as well as identifying critical exposure windows<sup>42, 43, 44</sup>.

32  
33 436 It is widely hypothesized that sedentary behavior may increase the risk of cancers  
34  
35 437 due to low energy expenditure and by inducing obesity, a well-understood risk factor  
36  
37 438 for endometrial cancer<sup>45</sup>. Under this circumstance, adjusting for obesity indices (mostly  
38  
39 439 BMI) may lead to overadjustment of the association and produce a less pronounced risk  
40  
41 440 estimate. Realizing this issue, three studies included in the meta-analysis have reported  
42  
43 441 respective results with and without adjustment for BMI<sup>17-19</sup>. The pooled estimates of  
44  
45 442 these studies showed that the association between sedentary behavior and endometrial  
46  
47 443 cancer attenuated but remained statistically significant after adjusting for BMI,  
48  
49 444 suggesting that other mechanisms distinct from obesity-related pathways likely exist.

50  
51 445 The biological mechanisms by which sedentary behavior increases endometrial  
52  
53  
54  
55  
56  
57  
58  
59  
60

1  
2  
3 446 cancer risk remains unclear. Several pathways related to metabolic abnormalities and  
4  
5 447 insulin sensitivity, chronic systemic inflammation, and endogenous sex hormones are  
6  
7 448 suggested as the main hypothesis linking physical activity, sedentary behavior and  
8  
9 449 obesity to cancer incidence<sup>41, 45-46</sup>. Besides, long-time sitting posture might also  
10  
11 450 contribute through its adverse effect on mitochondrial and endothelial function<sup>41</sup>. Given  
12  
13 451 the complex mechanisms, further analysis may help better understand the potential  
14  
15 452 mechanisms through rating evidence separately among different study populations,  
16  
17 453 particularly in non-obese and obese, pre-menopausal and post-menopausal women,  
18  
19 454 populations with different intensity of physical activity, and for different histological  
20  
21 455 subtypes<sup>42</sup>.

22  
23  
24  
25  
26 456 Strengths of this systematic review and meta-analysis include strictly following  
27  
28 457 the uniform criteria for study selection, quality evaluation and reporting. Also, our  
29  
30 458 meta-analysis included substantial numbers of participants and cancer cases, ensuring  
31  
32 459 sufficient statistical power to yield precise associations. Furthermore, our meta-analysis  
33  
34 460 revealed some novel insights not previously investigated, such as varied effects of  
35  
36 461 sedentary behavior on endometrial cancer across different domains. This is also the first  
37  
38 462 study taking the complex interaction between obesity, physical activity, and sedentary  
39  
40 463 behavior into account in the association. Additional merits include the robustness of the  
41  
42 464 pooled associations in multiple subgroups and sensitivity analyses within different  
43  
44 465 sedentary behavior domains.

45  
46  
47  
48  
49 466 There are some limitations in our review at the level of the meta-analysis and at  
50  
51 467 the level of included studies that need to be noticed. At the review level, we observed  
52  
53 468 evidence of heterogeneity between subgroups especially within leisure-time domain.  
54  
55 469 However, this seems to be mainly driven by one large-sampled study with contradicting  
56  
57 470 conclusion. After excluding the study, no more indication of heterogeneity was shown.  
58  
59  
60

1  
2  
3 471 Also, the pooled associations showed little evidence of heterogeneity across different  
4  
5 472 domains of sedentary behavior and endometrial cancer. Secondly, the small number of  
6  
7 473 studies included in our meta-analysis could lower the statistical power and limit the  
8  
9 474 ability to examine the existence of small study effects and excess significance bias. For  
10  
11 475 total domain of sedentary behavior, only two studies estimated the association with  
12  
13 476 endometrial cancer. In such case, the reliability of the pooling may be influenced, and  
14  
15 477 the results should be interpreted with caution<sup>47</sup>. Thirdly, it should be emphasized that  
16  
17 478 there could be wide interindividual variation in level of sedentary behavior, with all  
18  
19 479 studies assessing self-reported levels of sedentariness based on questionnaires,  
20  
21 480 interviews, or job titles, and neither of these studies applied repeated measures or  
22  
23 481 corrected for measurement errors. Most included studies compared high versus low  
24  
25 482 level of sedentary behavior and thus, the effect estimate may be inflated compared to a  
26  
27 483 linear analysis. Moreover, definitions of high versus low levels of sedentary behavior  
28  
29 484 varied greatly in the included studies. For example, the highest level of sedentary  
30  
31 485 behavior in some studies may vary from more than 3 to 8 hours/day<sup>9, 38</sup>, which may  
32  
33 486 decrease the comparability among studies. There is therefore an urgent need for the  
34  
35 487 combination of self-report assessment, objective quantitative monitors in further  
36  
37 488 prospective cohort studies, to study these associations and improve understanding of  
38  
39 489 benefits brought by reductions in sedentary time. Caution is warranted in interpreting  
40  
41 490 our findings, as despite the association between sedentary behavior and increased  
42  
43 491 endometrial cancer risk, the relatively low cancer incidence means that higher relative  
44  
45 492 risks observed may only lead to slight increases in absolute risk.  
46  
47  
48  
49  
50  
51  
52  
53  
54  
55

## 56 494 **Conclusion**

57  
58 495 Despite the little evidence on domain-specific effect of sedentary behavior on  
59  
60

1  
2  
3 496 endometrial cancer, we found, in general, higher levels of total and occupational  
4  
5 497 sedentary behavior increase the risk of endometrial cancer. The association between  
6  
7 498 leisure-time sedentary behavior and endometrial cancer is borderline significant. The  
8  
9 499 pooling may be influenced by limited studies and variations in assessment of sedentary  
10  
11 500 behavior and should be interpreted with caution. Future longitudinal studies employing  
12  
13 501 objective physical activity monitors may help to clarify the quantitative association  
14  
15 502 between total and domain-specific sedentary behavior and endometrial cancer. The  
16  
17 503 interactive effects of physical activity, obesity and sedentary behavior on endometrial  
18  
19 504 cancer warrant further investigation as well.  
20  
21  
22  
23  
24  
25  
26  
27  
28  
29  
30  
31  
32  
33  
34  
35  
36  
37  
38  
39  
40  
41  
42  
43  
44  
45  
46  
47  
48  
49  
50  
51  
52  
53  
54  
55  
56  
57  
58  
59  
60

1  
2  
3 **Declarations**  
4

5 **Ethics approval and consent to participate** Not applicable.  
6

7 **Consent for publication** Not applicable.  
8  
9

10 **Availability of data and materials** All data generated or analyzed during this study  
11  
12 are included in this published article and its supplementary information files.  
13

14 **Competing interests** None declared.  
15

16 **Funding** This study is funded by the National Natural Science Foundation of China  
17  
18 (grant number 81972438 to XW), two grants from the Shanghai Hospital Development  
19  
20 Center (grant number SHDC12020107 to XW, SHDC2020CR5003 to XW). The  
21  
22 funding bodies have not participated in the design of the study and collection, analysis,  
23  
24 interpretation of data or in writing the manuscript.  
25  
26

27 **Authors' contributions** The literature reviews were conducted by LY and JN. LY and  
28  
29 ZL drafted the manuscript based on discussion involving all the authors, and  
30  
31 contributed to the integrity of the data and statistical analysis. ZL and XW contributed  
32  
33 to study concept and design, and critical revision of the manuscript and administrative  
34  
35 support. WL, and QY supervised the study, critically reviewed the draft and approved  
36  
37 the final version before submission.  
38  
39  
40  
41  
42  
43  
44  
45  
46  
47  
48  
49  
50  
51  
52  
53  
54  
55  
56  
57  
58  
59  
60

## Reference

1. Sung H, Ferlay J, Siegel RL, et al. Global Cancer Statistics 2020: GLOBOCAN Estimates of Incidence and Mortality Worldwide for 36 Cancers in 185 Countries. *CA Cancer J Clin*. 2021;71(3):209-249. doi:10.3322/caac.21660
2. Lortet-Tieulent J, Ferlay J, Bray F, Jemal A. International Patterns and Trends in Endometrial Cancer Incidence, 1978–2013. *JNCI J Natl Cancer Inst*. 2018;110(4):354-361. doi:10.1093/jnci/djx214
3. Katzmarzyk PT, Friedenreich C, Shiroma EJ, Lee IM. Physical inactivity and non-communicable disease burden in low-income, middle-income and high-income countries. *Br J Sports Med*. 2022;56(2):101-106. doi:10.1136/bjsports-2020-103640
4. Yasin HK, Taylor AH, Ayakannu T. A Narrative Review of the Role of Diet and Lifestyle Factors in the Development and Prevention of Endometrial Cancer. *Cancers*. 2021;13(9):2149. doi:10.3390/cancers13092149
5. *WHO Guidelines on Physical Activity and Sedentary Behaviour*. World Health Organization; 2020.
6. Schmid D, Leitzmann MF. Television Viewing and Time Spent Sedentary in Relation to Cancer Risk: A Meta-Analysis. *JNCI J Natl Cancer Inst*. 2014;106(7). doi:10.1093/jnci/dju098
7. Shen D, Mao W, Liu T, et al. Sedentary Behavior and Incident Cancer: A Meta-Analysis of Prospective Studies. Guo NL, ed. *PLoS ONE*. 2014;9(8):e105709. doi:10.1371/journal.pone.0105709
8. Hermelink R, Leitzmann MF, Markozannes G, et al. Sedentary behavior and cancer—an umbrella review and meta-analysis. *Eur J Epidemiol*. 2022;37(5):447-460. doi:10.1007/s10654-022-00873-6
9. Hunter RF, Murray JM, Coleman HG. The association between recreational screen time and cancer risk: findings from the UK Biobank, a large prospective cohort study. *Int J Behav Nutr Phys Act*. 2020;17(1):97. doi:10.1186/s12966-020-00997-6
10. Miyata H, Shirai K, Muraki I, Iso H, Tamakoshi A. Associations of Body Mass Index, Weight Change, Physical Activity, and Sedentary Behavior With Endometrial Cancer Risk Among Japanese Women: The Japan Collaborative Cohort Study. *J Epidemiol*. 2021;31(12):621-627. doi:10.2188/jea.JE20200145
11. Moore SC, Gierach GL, Schatzkin A, Matthews CE. Physical activity, sedentary behaviours, and the prevention of endometrial cancer. *Br J Cancer*. 2010;103(7):933-938. doi:10.1038/sj.bjc.6605902
12. Mahmood S, MacInnis RJ, English DR, Karahalios A, Lynch BM. Domain-specific physical activity and sedentary behaviour in relation to colon and rectal cancer risk: a systematic review and meta-analysis. *Int J Epidemiol*. 2017;46(6):1797-1813. doi:10.1093/ije/dyx137
13. Hobbs M, Pearson N, Foster PJ, Biddle SJH. Sedentary behaviour and diet across the lifespan: an updated systematic review. *Br J Sports Med*. 2015;49(18):1179-1188. doi:10.1136/bjsports-2014-093754



14. Jochem C, Wallmann-Sperlich B, Leitzmann MF. The Influence of Sedentary Behavior on Cancer Risk: Epidemiologic Evidence and Potential Molecular Mechanisms. *Curr Nutr Rep.* 2019;8(3):167-174. doi:10.1007/s13668-019-0263-4
15. Lauby-Secretan B, Scoccianti C, Loomis D, Grosse Y, Bianchini F, Straif K. Body Fatness and Cancer — Viewpoint of the IARC Working Group. *N Engl J Med.* 2016;375(8):794-798. doi:10.1056/NEJMSr1606602
16. Shu XO, Hatch MC, Zheng W, Gao YT, Brinton LA. Physical Activity and Risk of Endometrial Cancer: *Epidemiology.* 1993;4(4):342-349. doi:10.1097/00001648-199307000-00010
17. Friberg E, Mantzoros CS, Wolk A. Physical Activity and Risk of Endometrial Cancer: A Population-Based Prospective Cohort Study. *Cancer Epidemiol Biomarkers Prev.* 2006;15(11):2136-2140. doi:10.1158/1055-9965.EPI-06-0465
18. Patel AV, Feigelson HS, Talbot JT, et al. The role of body weight in the relationship between physical activity and endometrial cancer: Results from a large cohort of US women. *Int J Cancer.* 2008;123(8):1877-1882. doi:10.1002/ijc.23716
19. Gierach GL, Chang SC, Brinton LA, et al. Physical activity, sedentary behavior, and endometrial cancer risk in the NIH-AARP Diet and Health Study. *Int J Cancer.* 2009;124(9):2139-2147. doi:10.1002/ijc.24059
20. Saint-Maurice PF, Sampson JN, Michels KA, et al. Physical Activity From Adolescence Through Midlife and Associations With Body Mass Index and Endometrial Cancer Risk. *JNCI Cancer Spectr.* 2021;5(4):pkab065. doi:10.1093/jncics/pkab065
21. Kitson SJ, Aurangzeb O, Parvaiz J, Lophatananon A, Muir KR, Crosbie EJ. Quantifying the Effect of Physical Activity on Endometrial Cancer Risk. *Cancer Prev Res (Phila Pa).* 2022;15(9):605-621. doi:10.1158/1940-6207.CAPR-22-0129
22. Page MJ, McKenzie JE, Bossuyt PM, et al. The PRISMA 2020 statement: an updated guideline for reporting systematic reviews. *BMJ.* Published online March 29, 2021:n71. doi:10.1136/bmj.n71
23. Stroup DF. Meta-analysis of Observational Studies in Epidemiology A Proposal for Reporting. *JAMA.* 2000;283(15):2008. doi:10.1001/jama.283.15.2008
24. Moradi T, Nyrén O, Bergström R, et al. Risk for endometrial cancer in relation to occupational physical activity: A nationwide cohort study in Sweden. *Int J Cancer.* 1998;76(5):665-670. doi:10.1002/(SICI)1097-0215(19980529)76:5<665::AID-IJC9>3.0.CO;2-O
25. Moradi T, Weiderpass E, Signorello LB, Persson I, Nyrén O, Adami HO. Physical activity and postmenopausal endometrial cancer risk (Sweden). *Cancer Causes Control.* 2000;11(9):829-837. doi:10.1023/A:1008919717930
26. Stang A. Critical evaluation of the Newcastle-Ottawa scale for the assessment of the quality of nonrandomized studies in meta-analyses. *Eur J Epidemiol.* 2010;25(9):603-605. doi:10.1007/s10654-010-9491-z
27. Wells GA, Shea B, D O'Connell, J Peterson, V Welch, M Losos, P Tugwell. The Newcastle-Ottawa Scale (NOS) for assessing the quality of nonrandomised studies in



- meta-analyses. 23 (accessed November 18 2020).  
[https://www.ohri.ca/programs/clinical\\_epidemiology/oxford.asp](https://www.ohri.ca/programs/clinical_epidemiology/oxford.asp)
28. Cai X, Zhang Y, Li M, et al. Association between prediabetes and risk of all cause mortality and cardiovascular disease: updated meta-analysis. *BMJ*. Published online July 15, 2020:m2297. doi:10.1136/bmj.m2297
29. Higgins JPT, Green S (Editors). *Cochrane Handbook for Systematic Reviews of Interventions* Version 5.1.0 [Updated March 2011]. The Cochrane Collaboration, 2011. Available from [Www.Handbook.Cochrane.Org](http://www.handbook.cochrane.org).
30. Olson SH, Vena JE, Dorn JP, et al. Exercise, occupational activity, and risk of endometrial cancer. *Ann Epidemiol*. 1997;7(1):46-53. doi:10.1016/S1047-2797(96)00071-3
31. Furberg AS, Thune I. Metabolic abnormalities (hypertension, hyperglycemia and overweight), lifestyle (high energy intake and physical inactivity) and endometrial cancer risk in a Norwegian cohort. *Int J Cancer*. 2003;104(6):669-676. doi:10.1002/ijc.10974
32. Hamling J, Lee P, Weitkunat R, Ambühl M. Facilitating meta-analyses by deriving relative effect and precision estimates for alternative comparisons from a set of estimates presented by exposure level or disease category. *Stat Med*. 2008;27(7):954-970. doi:10.1002/sim.3013
33. Weiderpass E, Pukkala E, Vasama-Neuvonen K, et al. Occupational exposures and cancers of the endometrium and cervix uteri in Finland. *Am J Ind Med*. 2001;39(6):572-580. doi:10.1002/ajim.1056
34. Dosemeci M, Hayes RB, Vetter R, et al. Occupational physical activity, socioeconomic status, and risks of 15 cancer sites in Turkey. *Cancer Causes Control*. 1993;4(4):313-321. doi:10.1007/BF00051333
35. Zheng W, Shu XO, Gao YT, McLaughlin JK, Chow WH, Blot WJ. Occupational physical activity and the incidence of cancer of the breast, corpus uteri, and ovary in shanghai. *Cancer*. 1993;71(11):3620-3624. doi:10.1002/1097-0142(19930601)71:11<3620::AID-CNCR2820711125>3.0.CO;2-S
36. Matthews CE, Xu WH, Zheng W, et al. Physical Activity and Risk of Endometrial Cancer: A Report from the Shanghai Endometrial Cancer Study. *Cancer Epidemiol Biomarkers Prev*. 2005;14(4):779-785. doi:10.1158/1055-9965.EPI-04-0665
37. Friedenreich CM, Cook LS, Magliocco AM, Duggan MA, Courneya KS. Case-control study of lifetime total physical activity and endometrial cancer risk. *Cancer Causes Control*. 2010;21(7):1105-1116. doi:10.1007/s10552-010-9538-1
38. Arem H, Irwin ML, Zhou Y, Lu L, Risch H, Yu H. Physical activity and endometrial cancer in a population-based case-control study. *Cancer Causes Control*. 2011;22(2):219-226. doi:10.1007/s10552-010-9689-0
39. Gilchrist SC, Howard VJ, Akinyemiju T, et al. Association of Sedentary Behavior With Cancer Mortality in Middle-aged and Older US Adults. *JAMA Oncol*. 2020;6(8):1210. doi:10.1001/jamaoncol.2020.2045

- 1  
2  
3  
4  
5  
6  
7  
8  
9  
10  
11  
12  
13  
14  
15  
16  
17  
18  
19  
20  
21  
22  
23  
24  
25  
26  
27  
28  
29  
30  
31  
32  
33  
34  
35  
36  
37  
38  
39  
40  
41  
42  
43  
44  
45  
46  
47  
48  
49  
50  
51  
52  
53  
54  
55  
56  
57  
58  
59  
60
40. Lavie CJ, Ozemek C, Carbone S, Katzmarzyk PT, Blair SN. Sedentary Behavior, Exercise, and Cardiovascular Health. *Circ Res*. 2019;124(5):799-815. doi:10.1161/CIRCRESAHA.118.312669
  41. Kerr J, Anderson C, Lippman SM. Physical activity, sedentary behaviour, diet, and cancer: an update and emerging new evidence. *Lancet Oncol*. 2017;18(8):e457-e471. doi:10.1016/S1470-2045(17)30411-4
  42. Kalliala I, Markozannes G, Gunter MJ, et al. Obesity and gynaecological and obstetric conditions: umbrella review of the literature. *BMJ*. Published online October 26, 2017;j4511. doi:10.1136/bmj.j4511
  43. Bodnar LM. Marginal Structural Models for Analyzing Causal Effects of Time-dependent Treatments: An Application in Perinatal Epidemiology. *Am J Epidemiol*. 2004;159(10):926-934. doi:10.1093/aje/kwh131
  44. Mansournia MA, Etminan M, Danaei G, Kaufman JS, Collins G. Handling time varying confounding in observational research. *BMJ*. Published online October 16, 2017;j4587. doi:10.1136/bmj.j4587
  45. Wiseman AJ, Lynch BM, Cameron AJ, Dunstan DW. Associations of change in television viewing time with biomarkers of postmenopausal breast cancer risk: the Australian Diabetes, Obesity and Lifestyle Study. *Cancer Causes Control*. 2014;25(10):1309-1319. doi:10.1007/s10552-014-0433-z
  46. Friedenreich CM, Ryder-Burbidge C, McNeil J. Physical activity, obesity and sedentary behavior in cancer etiology: epidemiologic evidence and biologic mechanisms. *Mol Oncol*. 2021;15(3):790-800. doi:10.1002/1878-0261.12772
  47. Borenstein M, Hedges LV, Higgins JPT, Rothstein HR. *Introduction to Meta-Analysis*. 1st ed. Wiley; 2009. doi:10.1002/9780470743386

## Figure legends

### Figure 1. PRISMA 2020 flow diagram of literature search and selection.

From: Page MJ, McKenzie JE, Bossuyt PM, Boutron I, Hoffmann TC, Mulrow CD, et al. The PRISMA 2020 statement: an updated guideline for reporting systematic reviews. *BMJ* 2021;372:n71. doi: 10.1136/bmj.n71. For more information, visit: <http://www.prisma-statement.org/>

### Figure 2. Pooled association between occupational sedentary behavior and endometrial cancer.

Note:  $I^2$  for heterogeneity between studies;  $P$  value for heterogeneity in subgroups; NA: not applicable. Adequate adjustment denotes adjustment for at least five of seven confounders: age; diabetes, blood glucose; hypertension, blood pressure; age at menarche, menopausal status and age, parity; smoking; oral use of contraceptives, use of hormone replacement therapy; and physical activity. Adjustment for BMI denotes adjustment for BMI in the multivariate model.

### Figure 3. Pooled association between leisure-time sedentary behavior and endometrial cancer.

Note:  $I^2$  for heterogeneity between studies;  $P$  value for heterogeneity in subgroups; NA: not applicable. Adequate adjustment denotes adjustment for at least five of seven confounders: age; diabetes, blood glucose; hypertension, blood pressure; age at menarche, menopausal status and age, parity; smoking; oral use of contraceptives, use of hormone replacement therapy; and physical activity. Adjustment for BMI denotes adjustment for BMI in the multivariate model.

### Figure 4. Pooled association between total sedentary behavior and endometrial cancer.

Note:  $I^2$  for heterogeneity between studies;  $P$  value for heterogeneity in subgroups; NA: not applicable. Adequate adjustment denotes adjustment for at least five of seven confounders: age; diabetes, blood glucose; hypertension, blood pressure; age at menarche, menopausal status and age, parity; smoking; oral use of contraceptives, use of hormone replacement therapy; and physical activity. Adjustment for BMI denotes adjustment for BMI in the multivariate model.

### Figure 5. Funnel plot of overall sedentary behavior and endometrial cancer.

1  
2  
3  
4  
5  
6  
7  
8  
9  
10  
11  
12  
13  
14  
15  
16  
17  
18  
19  
20  
21  
22  
23  
24  
25  
26  
27  
28  
29  
30  
31  
32  
33  
34  
35  
36  
37  
38  
39  
40  
41  
42  
43  
44  
45  
46

**Id  
en  
ti  
fi  
ca  
tio  
n**

**Sc  
re  
en  
in  
g**

**In  
cl  
ud  
ed**

**Identification of studies via databases and registers**

**Identification of studies via other methods**

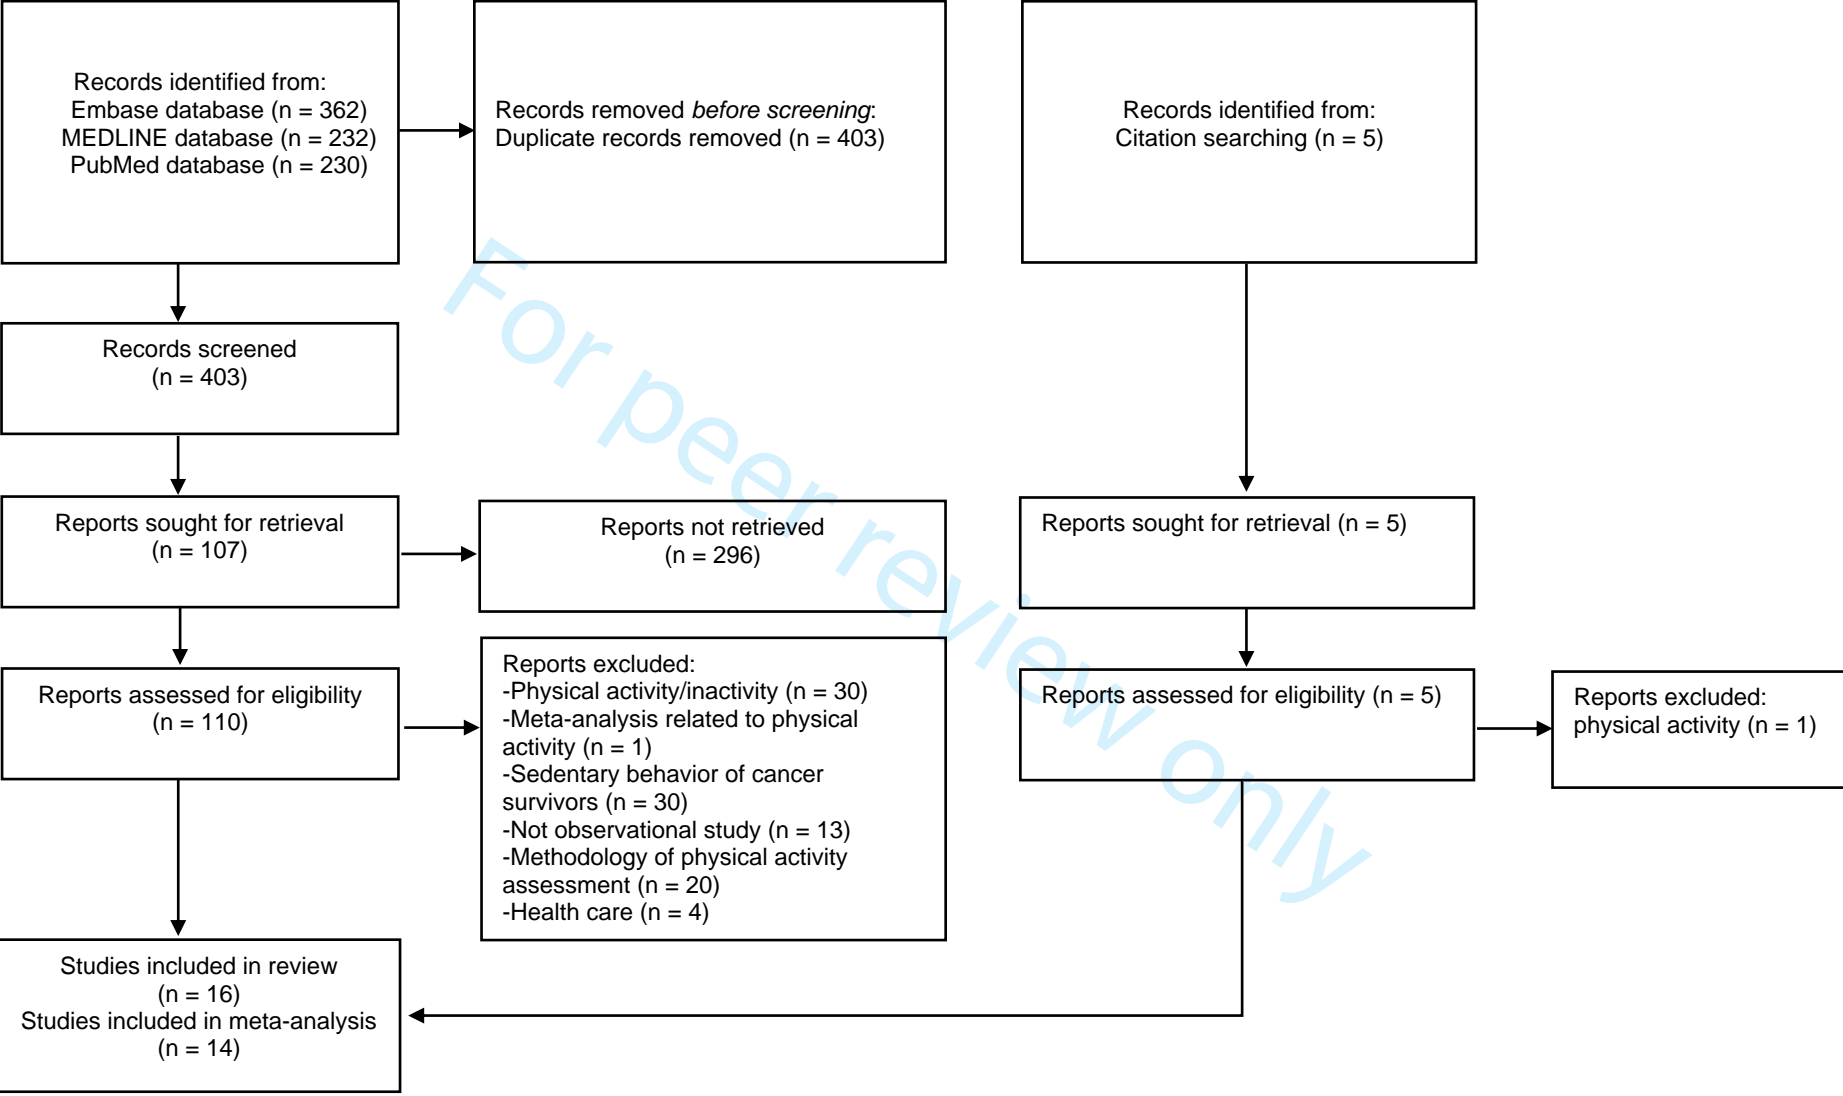

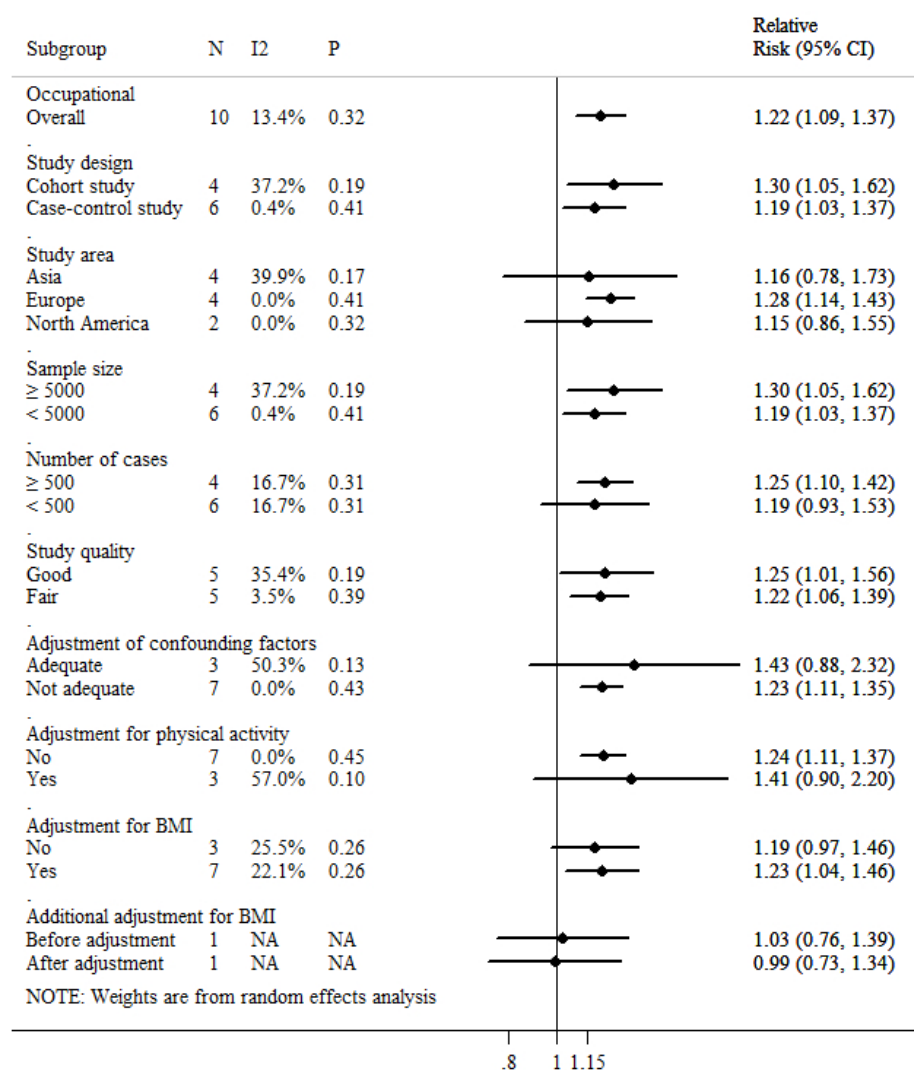

Figure 2. Pooled association between occupational sedentary behavior and endometrial cancer. Note: I2 for heterogeneity between studies; P value for heterogeneity in subgroups; NA: not applicable. Adequate adjustment denotes adjustment for at least five of seven confounders: age; diabetes, blood glucose; hypertension, blood pressure; age at menarche, menopausal status and age, parity; smoking; oral use of contraceptives, use of hormone replacement therapy; and physical activity. Adjustment for BMI denotes adjustment for BMI in the multivariate model.

241x277mm (72 x 72 DPI)

1  
2  
3  
4  
5  
6  
7  
8  
9  
10  
11  
12  
13  
14  
15  
16  
17  
18  
19  
20  
21  
22  
23  
24  
25  
26  
27  
28  
29  
30  
31  
32  
33  
34  
35  
36  
37  
38  
39  
40  
41  
42  
43  
44  
45  
46  
47  
48  
49  
50  
51  
52  
53  
54  
55  
56  
57  
58  
59  
60

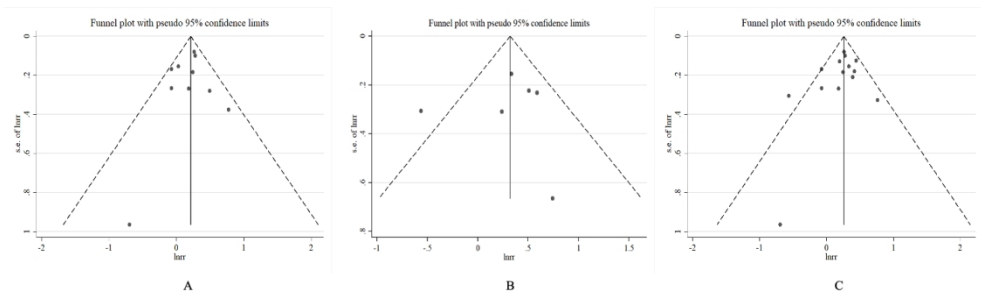

Figure 3. Funnel plot of overall sedentary behavior and endometrial cancer.

573x247mm (72 x 72 DPI)

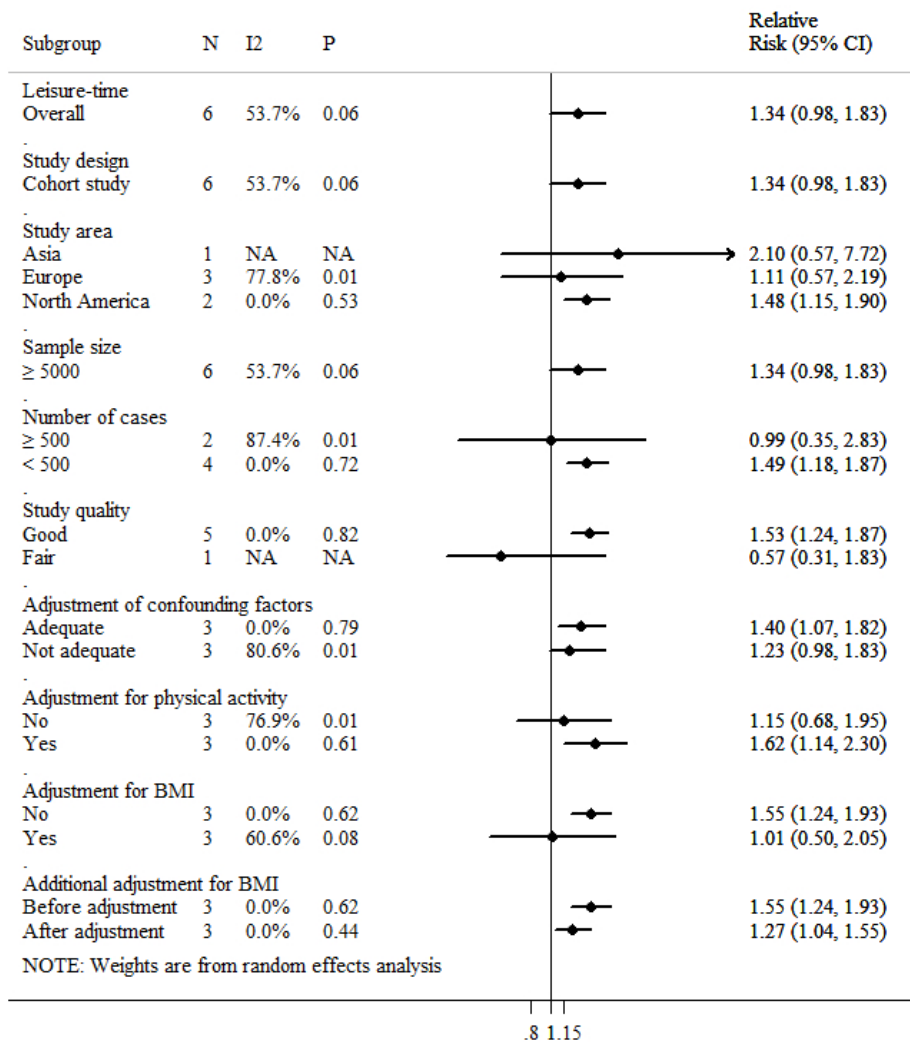

Figure 4. Pooled association between leisure-time sedentary behavior and endometrial cancer. Note: I<sup>2</sup> for heterogeneity between studies; P value for heterogeneity in subgroups; NA: not applicable. Adequate adjustment denotes adjustment for at least five of seven confounders: age; diabetes, blood glucose; hypertension, blood pressure; age at menarche, menopausal status and age, parity; smoking; oral use of contraceptives, use of hormone replacement therapy; and physical activity. Adjustment for BMI denotes adjustment for BMI in the multivariate model.

246x277mm (72 x 72 DPI)

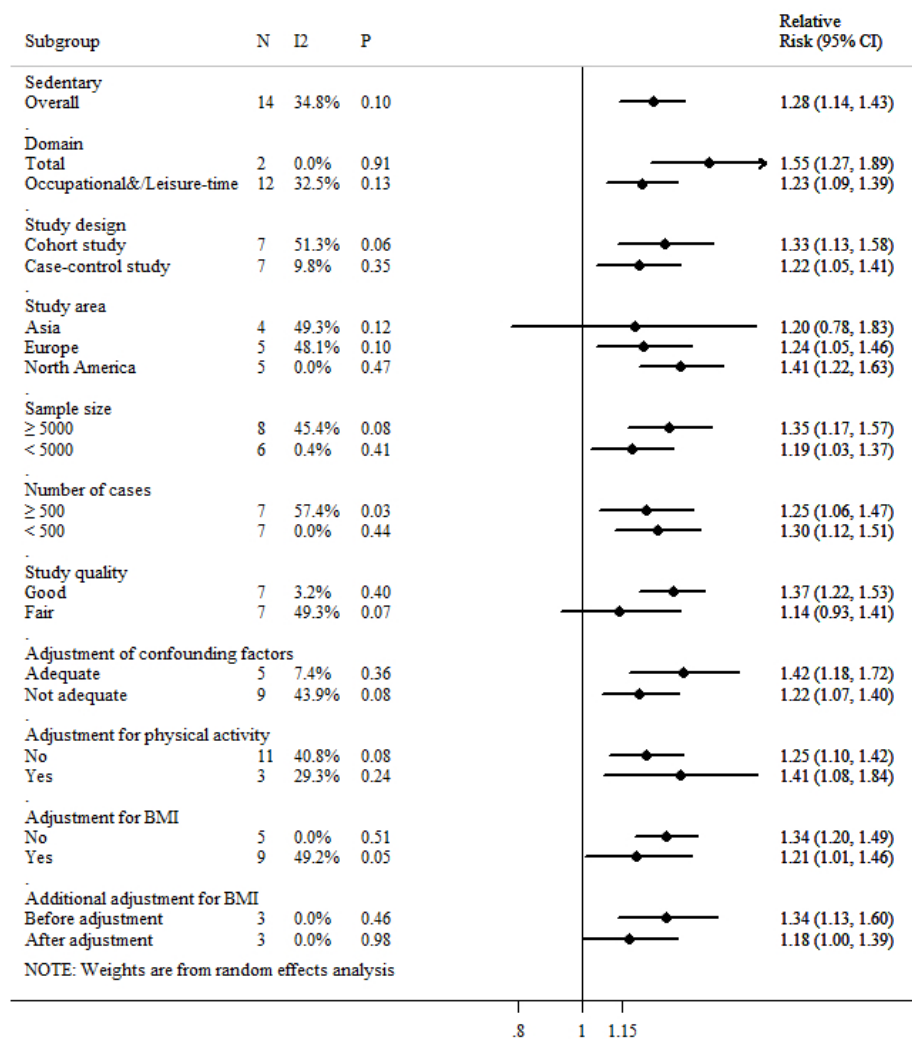

Figure 5. Pooled association between total sedentary behavior and endometrial cancer. Note: I<sup>2</sup> for heterogeneity between studies; P value for heterogeneity in subgroups; NA: not applicable. Adequate adjustment denotes adjustment for at least five of seven confounders: age; diabetes, blood glucose; hypertension, blood pressure; age at menarche, menopausal status and age, parity; smoking; oral use of contraceptives, use of hormone replacement therapy; and physical activity. Adjustment for BMI denotes adjustment for BMI in the multivariate model.

247x277mm (72 x 72 DPI)





## PRISMA 2020 Checklist

| Section and Topic             | Item # | Checklist item                                                                                                                                                                                                                                                                                       | Location where item is reported |
|-------------------------------|--------|------------------------------------------------------------------------------------------------------------------------------------------------------------------------------------------------------------------------------------------------------------------------------------------------------|---------------------------------|
| <b>TITLE</b>                  |        |                                                                                                                                                                                                                                                                                                      |                                 |
| Title                         | 1      | Identify the report as a systematic review.                                                                                                                                                                                                                                                          | 1                               |
| <b>ABSTRACT</b>               |        |                                                                                                                                                                                                                                                                                                      |                                 |
| Abstract                      | 2      | See the PRISMA 2020 for Abstracts checklist.                                                                                                                                                                                                                                                         | 2                               |
| <b>INTRODUCTION</b>           |        |                                                                                                                                                                                                                                                                                                      |                                 |
| Rationale                     | 3      | Describe the rationale for the review in the context of existing knowledge.                                                                                                                                                                                                                          | 5-7                             |
| Objectives                    | 4      | Provide an explicit statement of the objective(s) or question(s) the review addresses.                                                                                                                                                                                                               | 7                               |
| <b>METHODS</b>                |        |                                                                                                                                                                                                                                                                                                      |                                 |
| Eligibility criteria          | 5      | Specify the inclusion and exclusion criteria for the review and how studies were grouped for the syntheses.                                                                                                                                                                                          | 7-8                             |
| Information sources           | 6      | Specify all databases, registers, websites, organisations, reference lists and other sources searched or consulted to identify studies. Specify the date when each source was last searched or consulted.                                                                                            | 7, Figure 1                     |
| Search strategy               | 7      | Present the full search strategies for all databases, registers and websites, including any filters and limits used.                                                                                                                                                                                 | 7-8                             |
| Selection process             | 8      | Specify the methods used to decide whether a study met the inclusion criteria of the review, including how many reviewers screened each record and each report retrieved, whether they worked independently, and if applicable, details of automation tools used in the process.                     | 8                               |
| Data collection process       | 9      | Specify the methods used to collect data from reports, including how many reviewers collected data from each report, whether they worked independently, any processes for obtaining or confirming data from study investigators, and if applicable, details of automation tools used in the process. | 8-9                             |
| Data items                    | 10a    | List and define all outcomes for which data were sought. Specify whether all results that were compatible with each outcome domain in each study were sought (e.g. for all measures, time points, analyses), and if not, the methods used to decide which results to collect.                        | 9                               |
|                               | 10b    | List and define all other variables for which data were sought (e.g. participant and intervention characteristics, funding sources). Describe any assumptions made about any missing or unclear information.                                                                                         | 9                               |
| Study risk of bias assessment | 11     | Specify the methods used to assess risk of bias in the included studies, including details of the tool(s) used, how many reviewers assessed each study and whether they worked independently, and if applicable, details of automation tools used in the process.                                    | 9-11                            |
| Effect measures               | 12     | Specify for each outcome the effect measure(s) (e.g. risk ratio, mean difference) used in the synthesis or presentation of results.                                                                                                                                                                  | 10                              |
| Synthesis methods             | 13a    | Describe the processes used to decide which studies were eligible for each synthesis (e.g. tabulating the study intervention characteristics and comparing against the planned groups for each synthesis (item #5)).                                                                                 | 9-10                            |
|                               | 13b    | Describe any methods required to prepare the data for presentation or synthesis, such as handling of missing summary statistics, or data conversions.                                                                                                                                                | 9-10                            |
|                               | 13c    | Describe any methods used to tabulate or visually display results of individual studies and syntheses.                                                                                                                                                                                               | 9-10                            |
|                               | 13d    | Describe any methods used to synthesize results and provide a rationale for the choice(s). If meta-analysis was performed, describe the model(s), method(s) to identify the presence and extent of statistical heterogeneity, and software package(s) used.                                          | 9-10                            |
|                               | 13e    | Describe any methods used to explore possible causes of heterogeneity among study results (e.g. subgroup analysis, meta-regression).                                                                                                                                                                 | 11                              |
|                               | 13f    | Describe any sensitivity analyses conducted to assess robustness of the synthesized results.                                                                                                                                                                                                         | 12                              |
| Reporting bias assessment     | 14     | Describe any methods used to assess risk of bias due to missing results in a synthesis (arising from reporting biases).                                                                                                                                                                              | 10-11                           |
| Certainty assessment          | 15     | Describe any methods used to assess certainty (or confidence) in the body of evidence for an outcome.<br>For peer review only - <a href="http://bmjopen.bmj.com/site/about/guidelines.xhtml">http://bmjopen.bmj.com/site/about/guidelines.xhtml</a>                                                  | 9-10                            |



## PRISMA 2020 Checklist

| Section and Topic             | Item # | Checklist item                                                                                                                                                                                                                                                                       | Location where item is reported            |
|-------------------------------|--------|--------------------------------------------------------------------------------------------------------------------------------------------------------------------------------------------------------------------------------------------------------------------------------------|--------------------------------------------|
| <b>RESULTS</b>                |        |                                                                                                                                                                                                                                                                                      |                                            |
| Study selection               | 16a    | Describe the results of the search and selection process, from the number of records identified in the search to the number of studies included in the review, ideally using a flow diagram.                                                                                         | 12, Figure 1                               |
|                               | 16b    | Cite studies that might appear to meet the inclusion criteria, but which were excluded, and explain why they were excluded.                                                                                                                                                          | 12                                         |
| Study characteristics         | 17     | Cite each included study and present its characteristics.                                                                                                                                                                                                                            | 12, Table 1                                |
| Risk of bias in studies       | 18     | Present assessments of risk of bias for each included study.                                                                                                                                                                                                                         | Figure 3                                   |
| Results of individual studies | 19     | For all outcomes, present, for each study: (a) summary statistics for each group (where appropriate) and (b) an effect estimate and its precision (e.g. confidence/credible interval), ideally using structured tables or plots.                                                     | Figure 2,4-5                               |
| Results of syntheses          | 20a    | For each synthesis, briefly summarise the characteristics and risk of bias among contributing studies.                                                                                                                                                                               | 12-19, Table 1, Supplemental material      |
|                               | 20b    | Present results of all statistical syntheses conducted. If meta-analysis was done, present for each the summary estimate and its precision (e.g. confidence/credible interval) and measures of statistical heterogeneity. If comparing groups, describe the direction of the effect. | 12-19, Figure 2,4-5                        |
|                               | 20c    | Present results of all investigations of possible causes of heterogeneity among study results.                                                                                                                                                                                       | 12-19, Figure 2,4-5, Supplemental material |
|                               | 20d    | Present results of all sensitivity analyses conducted to assess the robustness of the synthesized results.                                                                                                                                                                           | 12-19, Supplemental material               |
| Reporting biases              | 21     | Present assessments of risk of bias due to missing results (arising from reporting biases) for each synthesis assessed.                                                                                                                                                              | 12-19, Figure 3                            |
| Certainty of evidence         | 22     | Present assessments of certainty (or confidence) in the body of evidence for each outcome assessed.                                                                                                                                                                                  | 12-19, Supplemental material               |
| <b>DISCUSSION</b>             |        |                                                                                                                                                                                                                                                                                      |                                            |
| Discussion                    | 23a    | Provide a general interpretation of the results in the context of other evidence.                                                                                                                                                                                                    | 20                                         |
|                               | 23b    | Discuss any limitations of the evidence included in the review.                                                                                                                                                                                                                      | 20-22                                      |
|                               | 23c    | Discuss any limitations of the review processes used.                                                                                                                                                                                                                                | 22-24                                      |
|                               | 23d    | Discuss implications of the results for practice, policy, and future research.                                                                                                                                                                                                       | 22-24                                      |
| <b>OTHER INFORMATION</b>      |        |                                                                                                                                                                                                                                                                                      |                                            |
| Registration and protocol     | 24a    | Provide registration information for the review, including register name and registration number, or state that the review was not registered.                                                                                                                                       | 7                                          |
|                               | 24b    | Indicate where the review protocol can be accessed, or state that a protocol was not prepared.                                                                                                                                                                                       | 7                                          |

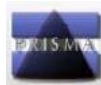

## PRISMA 2020 Checklist

1  
2  
3  
4  
5  
6  
7  
8  
9  
10  
11  
12  
13  
14  
15  
16  
17  
18  
19  
20  
21  
22  
23  
24  
25  
26  
27  
28  
29  
30  
31  
32  
33  
34  
35  
36  
37  
38  
39  
40  
41  
42  
43  
44  
45  
46  
47

| Section and Topic                              | Item # | Checklist item                                                                                                                                                                                                                             | Location where item is reported |
|------------------------------------------------|--------|--------------------------------------------------------------------------------------------------------------------------------------------------------------------------------------------------------------------------------------------|---------------------------------|
|                                                | 24c    | Describe and explain any amendments to information provided at registration or in the protocol.                                                                                                                                            | 7                               |
| Support                                        | 25     | Describe sources of financial or non-financial support for the review, and the role of the funders or sponsors in the review.                                                                                                              | 26                              |
| Competing interests                            | 26     | Declare any competing interests of review authors.                                                                                                                                                                                         | 26                              |
| Availability of data, code and other materials | 27     | Report which of the following are publicly available and where they can be found: template data collection forms; data extracted from included studies; data used for all analyses; analytic code; any other materials used in the review. | 26                              |

From: Page MJ, McKenzie JE, Bossuyt PM, Boutron I, Hoffmann TC, Mulrow CD, et al. The PRISMA 2020 statement: an updated guideline for reporting systematic reviews. *BMJ* 2021;372:n71. doi: 10.1136/bmj.n71

For more information, visit: <http://www.prisma-statement.org/>

**MOOSE reporting checklist for meta-analyses of observational studies.**

| Reporting section and item          |                                                                                                                                                                                                                                                                              | Reported on page                   |
|-------------------------------------|------------------------------------------------------------------------------------------------------------------------------------------------------------------------------------------------------------------------------------------------------------------------------|------------------------------------|
| <b>Reporting of background</b>      |                                                                                                                                                                                                                                                                              |                                    |
| 1                                   | Problem definition                                                                                                                                                                                                                                                           | 5-6                                |
| 2                                   | Hypothesis statement                                                                                                                                                                                                                                                         | 6-7                                |
| 3                                   | Description of study outcome(s)                                                                                                                                                                                                                                              | 7                                  |
| 4                                   | Type of exposure or intervention used                                                                                                                                                                                                                                        | 7                                  |
| 5                                   | Type of study designs used                                                                                                                                                                                                                                                   | 7                                  |
| 6                                   | Study population                                                                                                                                                                                                                                                             | 7                                  |
| <b>Reporting of search strategy</b> |                                                                                                                                                                                                                                                                              |                                    |
| 1                                   | Qualifications of searchers (eg, librarians and investigators)                                                                                                                                                                                                               | 7-8                                |
| 2                                   | Search strategy, including time period included in the synthesis and keywords                                                                                                                                                                                                | 7-8,<br>Supplementary Text         |
| 3                                   | Effort to include all available studies, including contact with authors                                                                                                                                                                                                      | 8                                  |
| 4                                   | Databases and registries searched                                                                                                                                                                                                                                            | 7                                  |
| 5                                   | Search software used, name and version, including special features used (eg, explosion)                                                                                                                                                                                      | 7                                  |
| 6                                   | Use of hand searching (eg, reference lists of obtained articles)                                                                                                                                                                                                             | 7-8                                |
| 7                                   | List of citations located and those excluded, including justification                                                                                                                                                                                                        | Figure 1                           |
| 8                                   | Method of addressing articles published in languages other than in English                                                                                                                                                                                                   | 8                                  |
| 9                                   | Method of handing abstracts and unpublished studies                                                                                                                                                                                                                          | 8                                  |
| 10                                  | Description of any contact with authors                                                                                                                                                                                                                                      | 8-9                                |
| <b>Reporting of methods</b>         |                                                                                                                                                                                                                                                                              |                                    |
| 1                                   | Description of relevance or appropriateness of studies assembled for assessing the hypothesis to be tested                                                                                                                                                                   | 8-9                                |
| 2                                   | Rationale for the selection and coding of data (eg, sound clinical principles or convenience)                                                                                                                                                                                | 8-9                                |
| 3                                   | Documentation of how data were classified and coded (eg, multiple raters, binding, and interrater reliability)                                                                                                                                                               | 9-12,<br>Supplemental material     |
| 4                                   | Assessment of confounding (eg, comparability of cases and controls in studies where appropriate)                                                                                                                                                                             | 9-10,<br>Supplemental material     |
| 5                                   | Assessment of study quality, including binding of quality assessors; stratification or regression on possible predictors of study results                                                                                                                                    | 9-10,<br>Supplemental material     |
| 6                                   | Assessment of heterogeneity                                                                                                                                                                                                                                                  | 10                                 |
| 7                                   | Description of statistical methods (eg, complete description of fixed or random effects models, justification of whether the chosen models account for predictors of study results, dose-response models, or cumulative meta-analyses) in sufficient detail to be replicated | 10-12                              |
| 8                                   | Provision of appropriate tables and graphics                                                                                                                                                                                                                                 | Figure 1,<br>Supplemental material |

| <b>Reporting of results</b>    |                                                                                                                           |                                   |
|--------------------------------|---------------------------------------------------------------------------------------------------------------------------|-----------------------------------|
| 1                              | Graphic summarizing individual study estimates and overall estimate                                                       | Figure 2, 4-5                     |
| 2                              | Table giving descriptive information for each study included                                                              | Table 1,<br>Supplemental material |
| 3                              | Results of sensitivity testing (eg, subgroup analysis)                                                                    | 16-19,<br>Supplemental material   |
| 4                              | Indication of statistical uncertainty of findings                                                                         | 16-19,<br>Supplemental material   |
| <b>Reporting of discussion</b> |                                                                                                                           |                                   |
| 1                              | Quantitative assessment of bias (eg, publication bias)                                                                    | 20-22, Figure 3                   |
| 2                              | Justification for exclusion (eg, exclusion for non-English-language citations)                                            | 20-24                             |
| 3                              | Assessment of quality of included studies                                                                                 | 20-22,<br>Supplemental material   |
| <b>Reporting of conclusion</b> |                                                                                                                           |                                   |
| 1                              | Consideration of alternative explanations for observed results                                                            | 24-25                             |
| 2                              | Generalization of the conclusions (ie, appropriate for the data presented and within the domain of the literature review) | 24-25                             |
| 3                              | Guideline for future research                                                                                             | 24-25                             |
| 4                              | Disclosure of funding source                                                                                              | 26                                |

## Supplementary Materials

**Supplemental Text.** Search terms and strategy

**Table S3.** Characteristics of participants and assessment of sedentary behaviour and outcome.

**Table S4.** Detailed data underlying the meta-analysis.

**Table S5.** Newcastle-Ottawa quality assessment scale for cohort study

**Table S6.** Newcastle-Ottawa quality assessment scale for case-control study

**Table S7.** Detailed information on adjusted confounders of studies included in systematic review

**Table S8.** Influence analysis of sedentary behaviour and endometrial cancer (given named study is omitted).

**Table S9.** Results of meta-regression analyses on individual study characteristics for studies included in the meta-analysis of the association between sedentary behaviour and the risk of endometrial cancer.

## Search terms and strategy

Search strategy in Embase/MEDLINE

('sedentary behavior':ab,ti OR 'physical inactivity':ab,ti OR 'sedentary lifestyle':ab,ti OR 'sedentary behaviour':ab,ti OR sedentary:ab,ti OR 'sitting time':ab,ti OR 'screen time':ab,ti OR 'television viewing':ab,ti OR 'physical activity':ab,ti) AND ('endometrial cancer':ab,ti OR endometrium:ab,ti OR 'uterus cancer':ab,ti OR 'uterine cancer':ab,ti OR 'corpus uteri cancer':ab,ti)

Search strategy in PubMed

((sedentary behavior[MeSH] OR physical inactivity[Title/Abstract] OR sedentary lifestyle[Title/Abstract] OR sedentary behaviour[Title/Abstract] OR sedentary[Title/Abstract] OR sitting time[Title/Abstract] OR screen time[Title/Abstract] OR television viewing[Title/Abstract] OR physical activity[Title/Abstract]) AND (endometrial cancer[MeSH] OR endometrium[Title/Abstract] OR uterus cancer[Title/Abstract] OR uterine cancer[Title/Abstract] OR corpus uteri cancer[Title/Abstract]))

**Table S3.** Study characteristics of the included studies in systematic review.

| Publication   | Participants' characteristics                                                                                                                                                                                                                                   | Follow-up period | Outcome                       |                                                                                                    | Sedentary behavior     | Definition and assessment of sedentary behavior                                                                                                                                                                                                                                                                                                                               |
|---------------|-----------------------------------------------------------------------------------------------------------------------------------------------------------------------------------------------------------------------------------------------------------------|------------------|-------------------------------|----------------------------------------------------------------------------------------------------|------------------------|-------------------------------------------------------------------------------------------------------------------------------------------------------------------------------------------------------------------------------------------------------------------------------------------------------------------------------------------------------------------------------|
|               |                                                                                                                                                                                                                                                                 |                  | Diagnostic criteria           | Specific cancer classification                                                                     |                        |                                                                                                                                                                                                                                                                                                                                                                               |
| Dosemeci 1993 | Hospital-based study population.                                                                                                                                                                                                                                | —                | —                             | —                                                                                                  | Occupational sedentary | Occupational Classification (SOC) code system: the sitting-time scale was defined as low activity (sedentary, i.e., sitting more than six hours a day); moderate activity (mod, i.e., sitting two to six hours a day); and high activity (active, i.e., sitting less than two hours a day)                                                                                    |
| Shu 1993      | Cases were identified through the population-based Shanghai Cancer Registry; female controls were individually matched to the cases on age through Shanghai Resident Registry.                                                                                  | —                | Histopathologically confirmed | Adenocarcinomas (76.2%), adenosquamous cancers (6.3%), other type (13.4%), and unspecified (4.1%). | Occupational sedentary | Interview using standardized coding scheme: sitting time index assessing the amount of time in a sitting posture on the job. Job with long sitting-times were defined as those with more than 80% of working hours spent sitting; moderate sitting-time jobs as 20-80% of working hours of time spent sitting; short sitting-time jobs as less than 20% of time spent sitting |
| Zheng 1993*   | Employment information for incident patients with cancer aged 30 years or older whose disease was diagnosed during the period 1980-1984 among the residents of urban Shanghai was compared with occupational data from the 1982 census for the same population. | —                | ICD-9, code 182               | —                                                                                                  | Occupational sedentary | Same as Shu et al.1993                                                                                                                                                                                                                                                                                                                                                        |



|              |                                                                                                                                                                                               |           |                                                  |                       |                        |                                                                                                                                                                                                                                                                                                                                                                                                                                                                                                                                                                                                                                                                                                                                                                 |
|--------------|-----------------------------------------------------------------------------------------------------------------------------------------------------------------------------------------------|-----------|--------------------------------------------------|-----------------------|------------------------|-----------------------------------------------------------------------------------------------------------------------------------------------------------------------------------------------------------------------------------------------------------------------------------------------------------------------------------------------------------------------------------------------------------------------------------------------------------------------------------------------------------------------------------------------------------------------------------------------------------------------------------------------------------------------------------------------------------------------------------------------------------------|
| Olson 1997   | Incident cases of primary endometrial cancer were identified from the major hospitals in western New York State. Controls without prior hysterectomy were selected from the community by age. | —         | Histologically confirmed                         | Adenomatous carcinoma | Occupational sedentary | <p>Three measures were used for occupational activity : an index of cumulative activity; the number of years in occupations with medium, heavy, or very heavy activity; and the activity level of the most recent job. An estimate of physical activity associated with employment was obtained from a detailed occupational history covering all jobs held for 6 months or longer. Occupations for job title and industry were coded according to the U.S. Department of Commerce Alphabetical Index of Occupations for the 1980 Census, and the U.S. Department of Labor's Estimates of Worker Trait Requirements were used to classify the activity level of each job as sedentary, light, medium, heavy, or very heavy based on job title and industry.</p> |
| Moradi 1998* | Swedish Cancer Environment Registry III (the national Swedish Cancer Register for 1971-1989 linked with the national population censuses from 1960 and 1970)                                  | 1971-1989 | ICD-7, code 172 and were histologically verified | —                     | Occupational sedentary | Occupations coding scheme; classified each occupation according to the estimated physical demands of the job, as very high, high, moderate, light and sedentary activity. Assessments were done independently by 3 Swedish specialists in occupational medicine with long experience in job classification.                                                                                                                                                                                                                                                                                                                                                                                                                                                     |

|                        |                                                                                                                                                                                                                                                                                                                                                                                                   |                  |                                                                                      |                                                                                      |                               |                                                                                                                                                                                                                                                                                                                                                                                                      |
|------------------------|---------------------------------------------------------------------------------------------------------------------------------------------------------------------------------------------------------------------------------------------------------------------------------------------------------------------------------------------------------------------------------------------------|------------------|--------------------------------------------------------------------------------------|--------------------------------------------------------------------------------------|-------------------------------|------------------------------------------------------------------------------------------------------------------------------------------------------------------------------------------------------------------------------------------------------------------------------------------------------------------------------------------------------------------------------------------------------|
| <p>Moradi 2000</p>     | <p>Postmenopausal women with an intact uterus and no previous breast or endometrial cancer diagnosis; Cases were women with an incident, primary, histopathologically confirmed endometrial cancer identified through the six regional cancer registries in Sweden; Control women were randomly selected from the continuously updated population register including all residents of Sweden.</p> | <p>—</p>         | <p>Histopathologically confirmed</p>                                                 | <p>—</p>                                                                             | <p>Occupational sedentary</p> | <p>Occupations coding scheme; classified each occupation according to the estimated physical demands of the job, as very high, high, moderate, light and sedentary activity. Assessments were done independently by 3 Swedish specialists in occupational medicine with long experience in job classification.</p>                                                                                   |
| <p>Weiderpass 2001</p> | <p>Population Census of Finland 1970 excluded women in the two highest social classes.</p>                                                                                                                                                                                                                                                                                                        | <p>1971-1995</p> | <p>ICD-9, code 182</p>                                                               | <p>—</p>                                                                             | <p>Occupational sedentary</p> | <p>A national job-exposure matrix (FINJEM) calculated the product of level and probability of an exposure, and subdivided into three categories: zero (reference category); low (roughly below median among job titles with exposure probability &gt; 0); and medium/high (called for simplicity 'high'; defined as equal or above the median among job titles with exposure probability &gt; 0)</p> |
| <p>Furberg 2003</p>    | <p>Alive women with complete data and no diagnosis of any malignant disease 1 year after participation in Norwegian National Health Screening Service's program.</p>                                                                                                                                                                                                                              | <p>1981-1996</p> | <p>Incident, primary, histopathologically confirmed carcinoma of the endometrium</p> | <p>127 adenocarcinomas (1 serious papillary adenocarcinoma = type II-carcinoma),</p> | <p>Recreational sedentary</p> | <p>Recreational activity: Grade1, Reading, watching television or other sedentary activity; Grade2, Walking, bicycling or other activity for at least 4 hr per week; Grade3, Recreational athletics, heavy gardening or similar activities at least 4 hr per week; and Grade 4, Regular (several times a week) training or participation in athletic competitions</p>                                |

|               |                                                                                                                                                                                                                                                                                                                      |           |                                                                                                                                              |                              |                                                  |                                                                                                                                                                                                                                                                                                                                                                                                                                                                                                                                                                                                                                                                 |
|---------------|----------------------------------------------------------------------------------------------------------------------------------------------------------------------------------------------------------------------------------------------------------------------------------------------------------------------|-----------|----------------------------------------------------------------------------------------------------------------------------------------------|------------------------------|--------------------------------------------------|-----------------------------------------------------------------------------------------------------------------------------------------------------------------------------------------------------------------------------------------------------------------------------------------------------------------------------------------------------------------------------------------------------------------------------------------------------------------------------------------------------------------------------------------------------------------------------------------------------------------------------------------------------------------|
|               |                                                                                                                                                                                                                                                                                                                      |           |                                                                                                                                              | and 3 unspecified carcinomas | Occupational sedentary                           | Occupational activity: Grade1, mostly sedentary work; Grade2, A lot of walking; Grade3, A lot of walking and lifting; and Grade4, Heavy manual work. The same team of trained nurses conducted interviews with the participants at the screening center in both surveys to confirm the information given                                                                                                                                                                                                                                                                                                                                                        |
| Matthews 2005 | Incident cases aged 30-69 who were permanent residents were identified from the Shanghai Cancer Registry; Controls, frequency matched to cases by age ( $\pm 5$ years), were randomly selected from permanent female residents using the Shanghai Resident Registry. Women who had a hysterectomy were not eligible. | —         | The diagnosis of each case was confirmed by medical chart review and a review of the available pathology slides by senior study pathologists | —                            | Occupational sedentary                           | Occupations were classified into high, medium, or low levels of estimated sitting time and activity level using job codes based on self-reported jobs held for at least 3 years                                                                                                                                                                                                                                                                                                                                                                                                                                                                                 |
| Friberg 2006  | Cohort members from mammography screening program, women diagnosed with cancer (other than nonmelanoma skin cancer) and those having had a hysterectomy before returning the follow-up questionnaire, and with missing information on physical activity were excluded.                                               | 1997-2005 | The Swedish Cancer Register and the Regional Cancer Register                                                                                 | —                            | Occupational sedentary<br>Recreational sedentary | Duration of specific activities was asked and assigned mean metabolic equivalent (MET) values [multiples of MET (kcal kg <sup>-1</sup> h <sup>-1</sup> )] based on specific activities within corresponding categories in a physical activity compendium. Occupational activity: low: mostly sitting (1.3 MET/h), and sitting down more than half the time (1.8 MET/h); high: mostly standing (2.2 MET/h), doing lifts (2.6 MET/h), a lot of lifts (3.0 MET/h), and heavy labor (3.9 MET/h)<br>For leisure time inactivity, there were five predefined categories for time spent per day watching TV/sitting (inactive leisure time, <1 hour daily to >6 hours) |

|              |                                                                                                                                                                                                                                                                                                                                |           |                                                                                                                                                             |                         |                        |                                                                                                                                                                                                                                                                                                                                          |
|--------------|--------------------------------------------------------------------------------------------------------------------------------------------------------------------------------------------------------------------------------------------------------------------------------------------------------------------------------|-----------|-------------------------------------------------------------------------------------------------------------------------------------------------------------|-------------------------|------------------------|------------------------------------------------------------------------------------------------------------------------------------------------------------------------------------------------------------------------------------------------------------------------------------------------------------------------------------------|
|              |                                                                                                                                                                                                                                                                                                                                |           |                                                                                                                                                             |                         |                        | daily, 1.2 MET/h)                                                                                                                                                                                                                                                                                                                        |
| Patel 2008   | Postmenopausal women in the American Cancer Society Cancer Prevention Study II (CPS-II) Nutrition Cohort, a large prospective study in the US, excluded women who reported prevalent cancer (except nonmelanoma skin cancer) or not being postmenopausal or who had a hysterectomy or unknown hysterectomy status at baseline. | 1997-2003 | Self-report on follow-up questionnaire and subsequently verified from medical records or linkage with state cancer registries, and the National Death Index | Endometrial carcinomas  | Recreational sedentary | Based on the question "During the past year, on an average day, (not counting time spent at your job) how many hours per day did you spend sitting (watching TV, reading, etc.)?" Responses included "none, less than 3, 3-5, 6-8, more than 8hr/day." Sedentary behavior at baseline was categorized as 0-<3, 3-5, ≥6 or missing hr/day |
| Gierach 2009 | Female members of the AARP (the American Association of Retired Persons) and resided in US states.                                                                                                                                                                                                                             | 1995-2003 | State cancer registries, and histology was defined using ICD for Oncology codes, 3rd edition                                                                | Adenocarcinomas (95.0%) | Recreational sedentary | Information on physical inactivity was based on two questions. Participants were asked about time spent watching TV or videos during a typical 24-hour period over the past 12 months. Time spent watching TV or videos was categorized as none, <1 hour, 1-2, 3-4, 5-6,7-8, and ≥ 9 hours                                               |
|              |                                                                                                                                                                                                                                                                                                                                |           |                                                                                                                                                             |                         | Total sedentary        | In a separate question, participants were also asked to indicate the number of hours spent sitting during a typical 24-hour period over the past 12 months: <3,3-4, 5-6, 7-8, and ≥ 9 hours. Both measures of inactivity were collapsed as <3, 3-4, 5-6,and ≥ 7 hours per day                                                            |

1  
2  
3  
4  
5  
6  
7  
8  
9  
10  
11  
12  
13  
14  
15  
16  
17  
18  
19  
20  
21  
22  
23  
24  
25  
26  
27  
28  
29  
30  
31  
32  
33  
34  
35  
36  
37  
38  
39  
40  
41  
42  
43  
44  
45  
46

|                                                                                     |                   |                                                                                                                                                                                                                                                                                    |                 |                                                                                                                                   |   |                        |                                                                                                                                                                                                                                                                                                                                                                                     |
|-------------------------------------------------------------------------------------|-------------------|------------------------------------------------------------------------------------------------------------------------------------------------------------------------------------------------------------------------------------------------------------------------------------|-----------------|-----------------------------------------------------------------------------------------------------------------------------------|---|------------------------|-------------------------------------------------------------------------------------------------------------------------------------------------------------------------------------------------------------------------------------------------------------------------------------------------------------------------------------------------------------------------------------|
| 1<br>2<br>3<br>4<br>5<br>6<br>7<br>8<br>9<br>10<br>11<br>12<br>13<br>14<br>15<br>16 | Friedenreich 2010 | Cases were Alberta residents, English-speaking, able to complete interview and questionnaire, and did not have another previous cancer except nonmelanoma skin cancer. Controls were identified using random-digit dialing and frequency matched to cases on age ( $\pm 5$ years). | —               | Incident, histologically confirmed invasive cases of endometrial cancer were identified directly from the Alberta Cancer Registry | — | Occupational sedentary | Lifetime occupational sedentary activity was estimated using a validated questionnaire. The patterns of physical activity were recorded by the interviewer including the age started, age ended, number of months per year, weeks per month, days per week and hours per day that each activity was performed so that the frequency and duration of these activities is determined. |
| 17<br>18<br>19<br>20<br>21<br>22<br>23<br>24<br>25<br>26                            | Arem 2011         | English-speaking, Connecticut residents diagnosed with primary endometrial cancer. Population-based controls were identified using random-digit dialing (RDD) and were frequency matched on age.                                                                                   | —               | —                                                                                                                                 | — | Total sedentary        | Time seated watching multimedia or sitting at work was calculated as hours per week from self-report in the two to five years before interview                                                                                                                                                                                                                                      |
| 27<br>28<br>29<br>30<br>31<br>32<br>33<br>34<br>35<br>36<br>37<br>38<br>39          | Hunter 2020       | Participants of UK Biobank cohort without been diagnosed with malignant cancer (excluding non-melanoma skin cancer), and have completed self-report screen time assessment.                                                                                                        | 7.6 (1.4) years | Uterus cancer identified from national cancer registries (ICD-10: C54; ICD-9: 182)                                                | — | Recreational sedentary | Television (TV) viewing time: "In a typical DAY, how many hours do you spend watching TV?"<br>Daily recreational computer use time: "In a typical DAY, how many hours do you spend using the computer? (Do not include using a computer at work)."<br>Daily total recreational screen time: self-reported time spent watching TV, and time spent using the computer outside of work |
| 40<br>41<br>42                                                                      | Miyata 2021       | Japanese inhabitants participated in municipal health screening                                                                                                                                                                                                                    | 14.8 years      | Cancer registries or local major                                                                                                  | — | Recreational sedentary | Television (TV) viewing (< 1, 1 to < 2, 2 to < 3, 3 to < 4, $\geq$ 4hr/day)                                                                                                                                                                                                                                                                                                         |

43  
44  
45  
46

1  
2  
3  
4  
5  
6  
7  
8  
9  
10  
11  
12  
13  
14  
15  
16  
17  
18  
19  
20  
21  
22  
23  
24  
25  
26  
27  
28  
29  
30  
31  
32  
33  
34  
35  
36  
37  
38  
39  
40  
41  
42  
43  
44  
45  
46

|  |                                                                                                      |  |                                                     |  |                        |                                                                                                                      |
|--|------------------------------------------------------------------------------------------------------|--|-----------------------------------------------------|--|------------------------|----------------------------------------------------------------------------------------------------------------------|
|  | examinations with completed questionnaires and no history of cancer or uterine surgery at enrolment. |  | hospital records coded according to the ICD-10: C54 |  | Occupational sedentary | Occupational activity was classified according to the position during work (mainly sitting, mainly standing, moving) |
|--|------------------------------------------------------------------------------------------------------|--|-----------------------------------------------------|--|------------------------|----------------------------------------------------------------------------------------------------------------------|

Note: Table values are mean (SD) for continuous variables; ICD, International Classification of Disease; \* studies not included in the meta-analysis.

For peer review only

**Table S4.** Detailed data underlying the meta-analysis.

Table S4-1. Detailed data for overall sedentary behaviour and endometrial cancer underlying the meta-analysis.

| Author       | Year | Domain                     | Study design       | Study area    | Sample size | Number of cases | RR (95% CI)       | Adjustment of confounding factors | Study quality | Adjustment for physical activity | Adjustment for BMI |
|--------------|------|----------------------------|--------------------|---------------|-------------|-----------------|-------------------|-----------------------------------|---------------|----------------------------------|--------------------|
| Gierach      | 2009 | Total                      | Cohort study       | North America | ≥ 5000      | ≥ 500           | 1.56 (1.22, 1.99) | Not adequate                      | Good          | No                               | No                 |
| Arem         | 2011 | Total                      | Case-control study | North America | ≥ 5000      | ≥ 500           | 1.52 (1.07, 2.16) | Adequate                          | Fair          | No                               | Yes                |
| Dosemeci     | 1993 | Occupational&/Leisure-time | Case-control study | Asia          | < 5000      | < 500           | 0.50 (0.10, 4.40) | Not adequate                      | Fair          | No                               | No                 |
| Shu          | 1993 | Occupational&/Leisure-time | Case-control study | Asia          | < 5000      | < 500           | 1.20 (0.70, 2.00) | Not adequate                      | Fair          | No                               | yes                |
| Olson        | 1997 | Occupational&/Leisure-time | Case-control study | North America | < 5000      | < 500           | 0.93 (0.55, 1.56) | Adequate                          | Good          | No                               | Yes                |
| Moradi       | 2000 | Occupational&/Leisure-time | Case-control study | Europe        | < 5000      | ≥ 500           | 1.32 (1.08, 1.60) | Not adequate                      | Good          | No                               | Yes                |
| Weiderpass   | 2001 | Occupational&/Leisure-time | Cohort study       | Europe        | ≥ 5000      | ≥ 500           | 1.30 (1.10, 1.50) | Not adequate                      | Fair          | No                               | No                 |
| Furberg      | 2003 | Occupational&/Leisure-time | Cohort study       | Europe        | ≥ 5000      | < 500           | 1.48 (0.97, 2.20) | Adequate                          | Good          | Yes                              | Yes                |
| Matthews     | 2005 | Occupational&/Leisure-time | Case-control study | Asia          | < 5000      | ≥ 500           | 0.93 (0.67, 1.30) | Not adequate                      | Fair          | No                               | Yes                |
| Friedenreich | 2010 | Occupational&/Leisure-time | Case-control study | North America | < 5000      | ≥ 500           | 1.28 (0.89, 1.83) | Not adequate                      | Fair          | No                               | Yes                |
| Miyata       | 2021 | Occupational&/Leisure-time | Cohort study       | Asia          | ≥ 5000      | < 500           | 2.15 (1.13, 4.09) | Adequate                          | Good          | Yes                              | Yes                |
| Friberg      | 2006 | Occupational&/Leisure-time | Cohort study       | Europe        | ≥ 5000      | < 500           | 1.22 (0.95, 1.57) | Not adequate                      | Good          | Yes                              | No                 |
| Patel        | 2008 | Occupational&/Leisure-time | Cohort study       | North America | ≥ 5000      | < 500           | 1.40 (1.03, 1.89) | Adequate                          | Good          | No                               | No                 |
| Hunter       | 2020 | Occupational&/Leisure-time | Cohort study       | Europe        | ≥ 5000      | ≥ 500           | 0.57 (0.31, 1.03) | Not adequate                      | Fair          | No                               | Yes                |

1  
2  
3  
4  
5  
6  
7  
8  
9  
10  
11  
12  
13  
14  
15  
16  
17  
18  
19  
20  
21  
22  
23  
24  
25  
26  
27  
28  
29  
30  
31  
32  
33  
34  
35  
36  
37  
38  
39  
40  
41  
42  
43  
44  
45  
46

Table S4-2. Detailed data for occupational sedentary behaviour and endometrial cancer underlying the meta-analysis.

| Author       | Year | Study design       | Study area    | Sample size | Number of cases | RR (95%CI)        | Adjustment of confounding factors | Study quality | Adjustment for physical activity | Adjustment for BMI | Additional adjustment for BMI |
|--------------|------|--------------------|---------------|-------------|-----------------|-------------------|-----------------------------------|---------------|----------------------------------|--------------------|-------------------------------|
| Dosemeci     | 1993 | Case-control study | Asia          | < 5000      | < 500           | 0.50 (0.10, 4.40) | Not adequate                      | Fair          | No                               | No                 |                               |
| Shu          | 1993 | Case-control study | Asia          | < 5000      | < 500           | 1.20 (0.70, 2.00) | Not adequate                      | Fair          | No                               | Yes                |                               |
| Olson        | 1997 | Case-control study | North America | < 5000      | < 500           | 0.93 (0.55, 1.56) | Adequate                          | Good          | No                               | Yes                |                               |
| Moradi       | 2000 | Case-control study | Europe        | < 5000      | ≥ 500           | 1.32 (1.08, 1.60) | Not adequate                      | Good          | No                               | Yes                |                               |
| Weiderpass   | 2001 | Cohort study       | Europe        | ≥ 5000      | ≥ 500           | 1.30 (1.10, 1.50) | Not adequate                      | Fair          | No                               | No                 |                               |
| Furberg      | 2003 | Cohort study       | Europe        | ≥ 5000      | < 500           | 1.64 (0.95, 2.84) | Adequate                          | Good          | Yes                              | Yes                |                               |
| Matthews     | 2005 | Case-control study | Asia          | < 5000      | ≥ 500           | 0.93 (0.67, 1.30) | Not adequate                      | Fair          | No                               | Yes                |                               |
| Friberg      | 2006 | Cohort study       | Europe        | ≥ 5000      | < 500           | 1.03 (0.76, 1.39) | Not adequate                      | Good          | Yes                              | No                 | 0.99 (0.73, 1.34)             |
| Friedenreich | 2010 | Case-control study | North America | < 5000      | ≥ 500           | 1.28 (0.89, 1.83) | Not adequate                      | Fair          | No                               | Yes                |                               |
| Miyata       | 2021 | Cohort study       | Asia          | ≥ 5000      | < 500           | 2.17 (1.04, 4.56) | Adequate                          | Good          | Yes                              | Yes                |                               |



Table 4-3. Detailed data for leisure-time sedentary behaviour and endometrial cancer underlying the meta-analysis.

| Author  | Year | Study design | Study area    | Sample size | Number of cases | RR (95% CI)       | Adjustment of confounding factors | Study quality | Adjustment for physical activity | Adjustment for BMI | Additional adjustment for BMI |
|---------|------|--------------|---------------|-------------|-----------------|-------------------|-----------------------------------|---------------|----------------------------------|--------------------|-------------------------------|
| Furberg | 2003 | Cohort study | Europe        | ≥ 5000      | < 500           | 1.27 (0.69, 2.32) | Adequate                          | Good          | Yes                              | Yes                |                               |
| Friberg | 2006 | Cohort study | Europe        | ≥ 5000      | < 500           | 1.80 (1.14, 2.83) | Not adequate                      | Good          | Yes                              | No                 | 1.66 (1.05, 2.61)             |
| Patel   | 2008 | Cohort study | North America | ≥ 5000      | < 500           | 1.40 (1.03, 1.89) | Adequate                          | Good          | No                               | No                 | 1.18 (0.87, 1.59)             |
| Gierach | 2009 | Cohort study | North America | ≥ 5000      | ≥ 500           | 1.66 (1.20, 2.88) | Not adequate                      | Good          | No                               | No                 | 1.21 (0.87, 1.67)             |
| Hunter  | 2020 | Cohort study | Europe        | ≥ 5000      | ≥ 500           | 0.57 (0.31, 1.03) | Not adequate                      | Fair          | No                               | Yes                |                               |
| Miyata  | 2021 | Cohort study | Asia          | ≥ 5000      | < 500           | 2.10 (0.57, 7.71) | Adequate                          | Good          | Yes                              | Yes                |                               |

**Table S5.** Newcastle-Ottawa quality assessment scale for cohort study.

| Source          | Selection                                |                                     |                           | Demonstration That Outcome of Interest Was Not Present at Start of Study | Comparability                                                   |                       | Outcome                                         |                                  | Total Stars |
|-----------------|------------------------------------------|-------------------------------------|---------------------------|--------------------------------------------------------------------------|-----------------------------------------------------------------|-----------------------|-------------------------------------------------|----------------------------------|-------------|
|                 | Representativeness of the Exposed Cohort | Selection of the Non-Exposed Cohort | Ascertainment of Exposure |                                                                          | Comparability of Cohorts on the Basis of the Design or Analysis | Assessment of Outcome | Was Follow-Up Long Enough for Outcomes to Occur | Adequacy of Follow Up of Cohorts |             |
| Hunter 2020     | 1                                        | 1                                   | -                         | 1                                                                        | 1                                                               | 1                     | 1                                               | -                                | 6           |
| Miyata 2021     | 1                                        | 1                                   | -                         | 1                                                                        | 2                                                               | 1                     | 1                                               | 1                                | 8           |
| Gierach 2009    | 1                                        | 1                                   | -                         | 1                                                                        | 1                                                               | 1                     | 1                                               | 1                                | 7           |
| Patel 2008      | 1                                        | 1                                   | -                         | 1                                                                        | 1                                                               | 1                     | 1                                               | 1                                | 7           |
| Friberg 2006    | 1                                        | 1                                   | -                         | 1                                                                        | 2                                                               | 1                     | 1                                               | 1                                | 8           |
| Furberg 2003    | 1                                        | 1                                   | 1                         | 1                                                                        | 2                                                               | 1                     | 1                                               | 1                                | 9           |
| Weiderpass 2001 | 1                                        | 1                                   | 1                         | -                                                                        | -                                                               | 1                     | 1                                               | -                                | 5           |

Note: A study can be awarded a maximum of one star for each numbered item within the Selection and Outcome categories. A maximum of two stars can be given for Comparability. For comparability in our analysis, a study can be awarded one star for controlling for age; Two stars for also controlling for physical activity.

**Table S6.** Newcastle-Ottawa quality assessment scale for case-control study.

| Source                   | Selection                        |                              |                       | Comparability          |                                                                            | Exposure                  |                                                     |                   | Total Stars |
|--------------------------|----------------------------------|------------------------------|-----------------------|------------------------|----------------------------------------------------------------------------|---------------------------|-----------------------------------------------------|-------------------|-------------|
|                          | Is the Case Definition Adequate? | Representatives of the Cases | Selection of Controls | Definition of Controls | Comparability of Cases and Controls on the Basis of the Design or Analysis | Ascertainment of Exposure | Same Method of Ascertainment for Cases and Controls | Non-Response Rate |             |
| <b>Arem 2011</b>         | 1                                | 1                            | 1                     | -                      | 1                                                                          | -                         | 1                                                   | -                 | 5           |
| <b>Friedenreich 2010</b> | 1                                | 1                            | 1                     | 1                      | 1                                                                          | -                         | 1                                                   | -                 | 6           |
| <b>Matthews 2005</b>     | 1                                | 1                            | 1                     | -                      | 1                                                                          | -                         | 1                                                   | -                 | 5           |
| <b>Moradi 2000</b>       | 1                                | 1                            | 1                     | 1                      | 1                                                                          | 1                         | 1                                                   | -                 | 7           |
| <b>Olson 1997</b>        | 1                                | 1                            | 1                     | 1                      | 1                                                                          | -                         | 1                                                   | 1                 | 7           |
| <b>Shu 1993</b>          | 1                                | 1                            | 1                     | -                      | 1                                                                          | -                         | 1                                                   | -                 | 5           |
| <b>Dosemeci 1993</b>     | -                                | 1                            | -                     | 1                      | 1                                                                          | 1                         | 1                                                   | 1                 | 6           |

Note: A study can be awarded a maximum of one star for each numbered item within the Selection and Exposure categories. A maximum of two stars can be given for Comparability. For comparability in our analysis, a study can be awarded one star for controlling for age; Two stars for also controlling for physical activity.

**Table S7.** Adjusted confounders of the included studies in systematic review.

| Publication  |      | Number of confounders | Adjusted confounders                                                                                                                                                                                                              | How to deal with obesity/BMI (particular attention to potential mediator BMI) |
|--------------|------|-----------------------|-----------------------------------------------------------------------------------------------------------------------------------------------------------------------------------------------------------------------------------|-------------------------------------------------------------------------------|
| Author       | Year |                       |                                                                                                                                                                                                                                   |                                                                               |
| Dosemeci     | 1993 | 3                     | Age, smoking and socioeconomic status (based on income and education levels)                                                                                                                                                      | —                                                                             |
| Shu          | 1993 | 4                     | Age, number of pregnancies, BMI, caloric intake                                                                                                                                                                                   | Adjusted in the multivariate model                                            |
| Zheng*       | 1993 | —                     | Age-specific and sex specific person-years estimated in each occupation category                                                                                                                                                  | —                                                                             |
| Olson        | 1997 | 9                     | Age, education, BMI, diabetes, smoking, parity, age at menarche, menopausal status, and use of unopposed estrogen.                                                                                                                | Adjusted in the multivariate model                                            |
| Moradi*      | 1998 | 4                     | Age at follow-up, place of residence, calendar year of follow-up, and socio-economic status                                                                                                                                       | —                                                                             |
| Moradi       | 2000 | 8                     | Age, parity, age at last birth, BMI 1 year prior to data collection, use of oral contraceptives, use of hormone replacement therapy, smoking, and age at menopause                                                                | Adjusted in the multivariate model                                            |
| Weiderpass   | 2001 | 3                     | Mean number of children, mean age at first birth, and turnover rate                                                                                                                                                               | —                                                                             |
| Furberg      | 2003 | 9                     | age, geographical region, height, BMI, recreational or occupational activity and smoking at baseline and parity. Also considered blood pressure and serum glucose                                                                 | Adjusted in the multivariate model                                            |
| Matthews     | 2005 | 12                    | Age, age at menarche, menopausal status and age, number of pregnancies, oral contraceptive use, current smoking, ever drinking, family history of cancer, education, height, and BMI                                              | Adjusted in the multivariate model                                            |
| Friberg      | 2006 | 9                     | Age in months, parity, history of diabetes, total fruit and vegetable, education, and work/occupation, walking/bicycling, household work, leisure time activity, and leisure time inactivity (watching TV/sitting) simultaneously | Additionally adjusted for BMI                                                 |
| Patel        | 2008 | 9                     | Age, age at menarche, age at menopause, duration of oral contraceptive use, parity, smoking, total caloric intake, personal history of diabetes and postmenopausal hormone therapy use                                            | Additionally adjusted for BMI                                                 |
| Gierach      | 2009 | 7                     | Age, race, smoking status, parity, ever use of oral contraceptives, age at menopause, hormone therapy formulation                                                                                                                 | Additionally adjusted for BMI                                                 |
| Friedenreich | 2010 | 6                     | Age, BMI, waist circumference, age at menarche, hypertension, and number of pregnancies of $\geq 20$ weeks gestation                                                                                                              | Adjusted in the multivariate model                                            |

|    |                     |      |    |                                                                                                                                                                                                                                                                   |                                    |
|----|---------------------|------|----|-------------------------------------------------------------------------------------------------------------------------------------------------------------------------------------------------------------------------------------------------------------------|------------------------------------|
| 1  | Arem                | 2011 | 8  | Age, BMI, race, number of live births, menopausal status, oral<br>contraceptive use, hypertension, and smoking status                                                                                                                                             | Adjusted in the multivariate model |
| 2  |                     |      |    |                                                                                                                                                                                                                                                                   |                                    |
| 3  |                     |      |    | Age, sex, ethnicity, deprivation index, education, fruit and vegetable<br>intake, BMI, smoking status, and alcohol intake, hormone therapy use,<br>oral contraceptive use, number of live births, age at menarche, age at<br>menopause, hysterectomy status       | Adjusted in the multivariate model |
| 4  | Hunter              | 2020 | 15 |                                                                                                                                                                                                                                                                   |                                    |
| 5  |                     |      |    |                                                                                                                                                                                                                                                                   |                                    |
| 6  |                     |      |    |                                                                                                                                                                                                                                                                   |                                    |
| 7  |                     |      |    |                                                                                                                                                                                                                                                                   |                                    |
| 8  |                     |      |    | Age, BMI, weight change since age 20, history of diabetes, history of<br>hypertension, age at menarche, menstrual presence, parity, smoking<br>status, alcohol consumption, occupational activity, hours of physical<br>exercise, walking, and television viewing | Adjusted in the multivariate model |
| 9  | Miyata <sup>7</sup> | 2021 | 13 |                                                                                                                                                                                                                                                                   |                                    |
| 10 |                     |      |    |                                                                                                                                                                                                                                                                   |                                    |
| 11 |                     |      |    |                                                                                                                                                                                                                                                                   |                                    |
| 12 |                     |      |    |                                                                                                                                                                                                                                                                   |                                    |

Note: BMI, body mass index. \* studies not included in the meta-analysis.

**Table S8.** Influence analysis of sedentary behaviour and endometrial cancer (given named study is omitted).

| Occupational domain |                   | Leisure-time domain |                   |
|---------------------|-------------------|---------------------|-------------------|
| Study omitted       | Estimate (95% CI) | Study omitted       | Estimate (95% CI) |
| Dosemeci 1993       | 1.23 (1.10, 1.38) | Furberg 2003        | 1.35 (0.93-1.95)  |
| Shu 1993            | 1.22 (1.08, 1.38) | Friberg 2006        | 1.24 (0.86-1.79)  |
| Olson 1997          | 1.24 (1.11, 1.39) | Patel 2008          | 1.31 (0.85-2.03)  |
| Moradi 2000         | 1.19 (1.04, 1.37) | Gierach 2009        | 1.26 (0.86-1.86)  |
| Weiderpass 2001     | 1.19 (1.03, 1.38) | Hunter 2020         | 1.53 (1.24-1.87)  |
| Furberg 2003        | 1.21 (1.08, 1.36) | Miyata 2021         | 1.30 (0.93-1.82)  |
| Matthews 2005       | 1.27 (1.15, 1.40) | Combined            | 1.34 (0.98-1.83)  |
| Friberg 2006        | 1.26 (1.12, 1.41) |                     |                   |
| Friedenreich 2010   | 1.21 (1.06, 1.38) |                     |                   |
| Miyata 2021         | 1.22 (1.11, 1.35) |                     |                   |
| Combined            | 1.22 (1.09, 1.37) |                     |                   |

**Table S9.** Results of meta-regression analyses on individual study characteristics for studies included in the meta-analysis of the association between sedentary behaviour and the risk of endometrial cancer.

| Covariates                        | N  | RR   | 95% CI |      | I <sup>2</sup> | Tau <sup>2</sup> | Ratio of RR | 95% CI    |      | P    |
|-----------------------------------|----|------|--------|------|----------------|------------------|-------------|-----------|------|------|
| Model with no covariates          | 14 | 1.28 | 1.14   | 1.43 | 34.8%          | 0.0000           | -           | -         | -    | -    |
| Domain*                           |    |      |        |      |                |                  |             |           |      |      |
| Total                             | 2  | 1.55 | 1.27   | 1.89 | 29.3%          | 0.0004           | 1.00        | Reference |      |      |
| Occupational                      | 10 | 1.22 | 1.09   | 1.37 |                |                  | 0.80        | 0.60      | 1.07 | 0.12 |
| Leisure-time                      | 6  | 1.34 | 0.98   | 1.83 |                |                  | 0.89        | 0.62      | 1.28 | 0.51 |
| Study design                      |    |      |        |      |                |                  |             |           |      |      |
| Cohort study                      | 7  | 1.33 | 1.13   | 1.58 | 36.8%          | 0.0027           | 1.00        | Reference |      |      |
| Case-control study                | 7  | 1.22 | 1.05   | 1.41 |                |                  | 0.91        | 0.72      | 1.17 | 0.44 |
| Study area                        |    |      |        |      |                |                  |             |           |      |      |
| Asia                              | 4  | 1.20 | 0.78   | 1.83 | 36.0%          | 0.0000           | 1.00        | Reference |      |      |
| Europe                            | 5  | 1.24 | 1.05   | 1.46 |                |                  | 1.14        | 0.78      | 1.68 | 0.47 |
| North America                     | 5  | 1.41 | 1.22   | 1.63 |                |                  | 1.26        | 0.84      | 1.91 | 0.24 |
| Sample size                       |    |      |        |      |                |                  |             |           |      |      |
| < 5000                            | 6  | 1.19 | 1.03   | 1.37 | 32.7%          | 0.0028           | 1.00        | Reference |      |      |
| ≥ 5000                            | 8  | 1.35 | 1.17   | 1.57 |                |                  | 1.15        | 0.90      | 1.47 | 0.24 |
| Number of cases                   |    |      |        |      |                |                  |             |           |      |      |
| < 500                             | 7  | 1.30 | 1.12   | 1.51 | 39.8%          | 0.0036           | 1.00        | Reference |      |      |
| ≥ 500                             | 7  | 1.25 | 1.06   | 1.47 |                |                  | 0.99        | 0.75      | 1.29 | 0.91 |
| Study quality                     |    |      |        |      |                |                  |             |           |      |      |
| Fair                              | 7  | 1.14 | 0.93   | 1.41 | 33.4%          | 0.0049           | 1.00        | Reference |      |      |
| Good                              | 7  | 1.37 | 1.22   | 1.53 |                |                  | 1.14        | 0.90      | 1.46 | 0.25 |
| Adjustment of confounding factors |    |      |        |      |                |                  |             |           |      |      |
| Not adequate                      | 9  | 1.22 | 1.07   | 1.40 | 35.4%          | 0.0014           | 1.00        | Reference |      |      |
| Adequate                          | 5  | 1.42 | 1.18   | 1.72 |                |                  | 1.13        | 0.85      | 1.50 | 0.36 |
| Adjustment for physical activity  |    |      |        |      |                |                  |             |           |      |      |
| No                                | 11 | 1.25 | 1.10   | 1.42 | 39.1%          | 0.0094           | 1.00        | Reference |      |      |
| Yes                               | 3  | 1.41 | 1.08   | 1.84 |                |                  | 1.10        | 0.78      | 1.55 | 0.55 |
| Adjustment for BMI                |    |      |        |      |                |                  |             |           |      |      |
| No                                | 5  | 1.34 | 1.20   | 1.49 | 37.0%          | 0.0029           | 1.00        | Reference |      |      |
| Yes                               | 9  | 1.21 | 1.01   | 1.46 |                |                  | 0.92        | 0.72      | 1.17 | 0.46 |

Meta-regression models are fitted assuming random effects that allow for between-study variability. I-squared (%) representing variation due to heterogeneity; Tau-squared representing estimate of between-study variance.

\*Number of studies exceeds in total as some research presented risk estimates separately for total sedentary, occupational, leisure-time domain.
