# Supplementary material for: Association between domain-specific sedentary behaviour and endometrial cancer: a systematic review and meta-analysis
Source: PubMed Central journal article supplement — BMJ Open. 2023 Jun 6;13(6):e069042. doi: 10.1136/bmjopen-2022-069042 (PMC10254909; doi:10.1136/bmjopen-2022-069042), 2023-06-06
Supplement: bmjopen-2022-069042supp001.pdf [file bmjopen-2022-069042supp001.pdf]

## Supplementary Materials

**Supplemental Text.** Search terms and strategy

**Table S3.** Characteristics of participants and assessment of sedentary behaviour and outcome.

**Table S4.** Detailed data underlying the meta-analysis.

**Table S5.** Newcastle-Ottawa quality assessment scale for cohort study

**Table S6.** Newcastle-Ottawa quality assessment scale for case-control study

**Table S7.** Detailed information on adjusted confounders of studies included in systematic review

**Table S8.** Influence analysis of sedentary behaviour and endometrial cancer (given named study is omitted).

**Table S9.** Results of meta-regression analyses on individual study characteristics for studies included in the meta-analysis of the association between sedentary behaviour and the risk of endometrial cancer.

### Search terms and strategy

#### Search strategy in Embase/MEDLINE

('sedentary behavior':ab,ti OR 'physical inactivity':ab,ti OR 'sedentary lifestyle':ab,ti OR 'sedentary behaviour':ab,ti OR sedentary:ab,ti OR 'sitting time':ab,ti OR 'screen time':ab,ti OR 'television viewing':ab,ti OR 'physical activity':ab,ti) AND ('endometrial cancer':ab,ti OR endometrium:ab,ti OR 'uterus cancer':ab,ti OR 'uterine cancer':ab,ti OR 'corpus uteri cancer':ab,ti)

#### Search strategy in PubMed

((sedentary behavior[MeSH] OR physical inactivity[Title/Abstract] OR sedentary lifestyle[Title/Abstract] OR sedentary behaviour[Title/Abstract] OR sedentary[Title/Abstract] OR sitting time[Title/Abstract] OR screen time[Title/Abstract] OR television viewing[Title/Abstract] OR physical activity[Title/Abstract]) AND (endometrial cancer[MeSH] OR endometrium[Title/Abstract] OR uterus cancer[Title/Abstract] OR uterine cancer[Title/Abstract] OR corpus uteri cancer[Title/Abstract]))

**Table S3.** Study characteristics of the included studies in systematic review.

| Publication   | Participants' characteristics                                                                                                                                                                                                                                   | Follow-up period | Outcome                       |                                                                                                    | Sedentary behavior     | Definition and assessment of sedentary behavior                                                                                                                                                                                                                                                                                                                               |
|---------------|-----------------------------------------------------------------------------------------------------------------------------------------------------------------------------------------------------------------------------------------------------------------|------------------|-------------------------------|----------------------------------------------------------------------------------------------------|------------------------|-------------------------------------------------------------------------------------------------------------------------------------------------------------------------------------------------------------------------------------------------------------------------------------------------------------------------------------------------------------------------------|
|               |                                                                                                                                                                                                                                                                 |                  | Diagnostic criteria           | Specific cancer classification                                                                     |                        |                                                                                                                                                                                                                                                                                                                                                                               |
| Dosemeci 1993 | Hospital-based study population.                                                                                                                                                                                                                                | —                | —                             | —                                                                                                  | Occupational sedentary | Occupational Classification (SOC) code system: the sitting-time scale was defined as low activity (sedentary, i.e., sitting more than six hours a day); moderate activity (mod, i.e., sitting two to six hours a day); and high activity (active, i.e., sitting less than two hours a day)                                                                                    |
| Shu 1993      | Cases were identified through the population-based Shanghai Cancer Registry; female controls were individually matched to the cases on age through Shanghai Resident Registry.                                                                                  | —                | Histopathologically confirmed | Adenocarcinomas (76.2%), adenosquamous cancers (6.3%), other type (13.4%), and unspecified (4.1%). | Occupational sedentary | Interview using standardized coding scheme: sitting time index assessing the amount of time in a sitting posture on the job. Job with long sitting-times were defined as those with more than 80% of working hours spent sitting; moderate sitting-time jobs as 20-80% of working hours of time spent sitting; short sitting-time jobs as less than 20% of time spent sitting |
| Zheng 1993*   | Employment information for incident patients with cancer aged 30 years or older whose disease was diagnosed during the period 1980-1984 among the residents of urban Shanghai was compared with occupational data from the 1982 census for the same population. | —                | ICD-9, code 182               | —                                                                                                  | Occupational sedentary | Same as Shu et al. 1993                                                                                                                                                                                                                                                                                                                                                       |

|              |                                                                                                                                                                                               |           |                                                  |                       |                        |                                                                                                                                                                                                                                                                                                                                                                                                                                                                                                                                                                                                                                                                                                                                                          |
|--------------|-----------------------------------------------------------------------------------------------------------------------------------------------------------------------------------------------|-----------|--------------------------------------------------|-----------------------|------------------------|----------------------------------------------------------------------------------------------------------------------------------------------------------------------------------------------------------------------------------------------------------------------------------------------------------------------------------------------------------------------------------------------------------------------------------------------------------------------------------------------------------------------------------------------------------------------------------------------------------------------------------------------------------------------------------------------------------------------------------------------------------|
| Olson 1997   | Incident cases of primary endometrial cancer were identified from the major hospitals in western New York State. Controls without prior hysterectomy were selected from the community by age. | —         | Histologically confirmed                         | Adenomatous carcinoma | Occupational sedentary | Three measures were used for occupational activity : an index of cumulative activity; the number of years in occupations with medium, heavy, or very heavy activity; and the activity level of the most recent job. An estimate of physical activity associated with employment was obtained from a detailed occupational history covering all jobs held for 6 months or longer. Occupations for job title and industry were coded according to the U.S. Department of Commerce Alphabetical Index of Occupations for the 1980 Census, and the U.S. Department of Labor's Estimates of Worker Trait Requirements were used to classify the activity level of each job as sedentary, light, medium, heavy, or very heavy based on job title and industry. |
| Moradi 1998* | Swedish Cancer Environment Registry III (the national Swedish Cancer Register for 1971-1989 linked with the national population censuses from 1960 and 1970)                                  | 1971-1989 | ICD-7, code 172 and were histologically verified | —                     | Occupational sedentary | Occupations coding scheme; classified each occupation according to the estimated physical demands of the job, as very high, high, moderate, light and sedentary activity. Assessments were done independently by 3 Swedish specialists in occupational medicine with long experience in job classification.                                                                                                                                                                                                                                                                                                                                                                                                                                              |

|                 |                                                                                                                                                                                                                                                                                                                                                                                            |           |                                                                               |                                                                               |                        |                                                                                                                                                                                                                                                                                                                                                                                         |
|-----------------|--------------------------------------------------------------------------------------------------------------------------------------------------------------------------------------------------------------------------------------------------------------------------------------------------------------------------------------------------------------------------------------------|-----------|-------------------------------------------------------------------------------|-------------------------------------------------------------------------------|------------------------|-----------------------------------------------------------------------------------------------------------------------------------------------------------------------------------------------------------------------------------------------------------------------------------------------------------------------------------------------------------------------------------------|
| Moradi 2000     | Postmenopausal women with an intact uterus and no previous breast or endometrial cancer diagnosis; Cases were women with an incident, primary, histopathologically confirmed endometrial cancer identified through the six regional cancer registries in Sweden; Control women were randomly selected from the continuously updated population register including all residents of Sweden. | —         | Histopathologically confirmed                                                 | —                                                                             | Occupational sedentary | Occupations coding scheme; classified each occupation according to the estimated physical demands of the job, as very high, high, moderate, light and sedentary activity. Assessments were done independently by 3 Swedish specialists in occupational medicine with long experience in job classification.                                                                             |
| Weiderpass 2001 | Population Census of Finland 1970 excluded women in the two highest social classes.                                                                                                                                                                                                                                                                                                        | 1971-1995 | ICD-9, code 182                                                               | —                                                                             | Occupational sedentary | A national job-exposure matrix (FINJEM) calculated the product of level and probability of an exposure, and subdivided into three categories: zero (reference category); low (roughly below median among job titles with exposure probability > 0); and medium/high (called for simplicity 'high'; defined as equal or above the median among job titles with exposure probability > 0) |
| Furberg 2003    | Alive women with complete data and no diagnosis of any malignant disease 1 year after participation in Norwegian National Health Screening Service's program.                                                                                                                                                                                                                              | 1981-1996 | Incident, primary, histopathologically confirmed carcinoma of the endometrium | 127 adenocarcinomas (1 serious papillary adenocarcinoma = type II-carcinoma), | Recreational sedentary | Recreational activity: Grade1, Reading, watching television or other sedentary activity; Grade2, Walking, bicycling or other activity for at least 4 hr per week; Grade3, Recreational athletics, heavy gardening or similar activities at least 4 hr per week; and Grade 4, Regular (several times a week) training or participation in athletic competitions                          |

|               |                                                                                                                                                                                                                                                                                                                      |           |                                                                                                                                              |                              |                        |                                                                                                                                                                                                                                                                                                                                                                                                                                                                                             |
|---------------|----------------------------------------------------------------------------------------------------------------------------------------------------------------------------------------------------------------------------------------------------------------------------------------------------------------------|-----------|----------------------------------------------------------------------------------------------------------------------------------------------|------------------------------|------------------------|---------------------------------------------------------------------------------------------------------------------------------------------------------------------------------------------------------------------------------------------------------------------------------------------------------------------------------------------------------------------------------------------------------------------------------------------------------------------------------------------|
|               |                                                                                                                                                                                                                                                                                                                      |           |                                                                                                                                              | and 3 unspecified carcinomas | Occupational sedentary | Occupational activity: Grade1, mostly sedentary work; Grade2, A lot of walking; Grade3, A lot of walking and lifting; and Grade4, Heavy manual work. The same team of trained nurses conducted interviews with the participants at the screening center in both surveys to confirm the information given                                                                                                                                                                                    |
| Matthews 2005 | Incident cases aged 30-69 who were permanent residents were identified from the Shanghai Cancer Registry; Controls, frequency matched to cases by age ( $\pm 5$ years), were randomly selected from permanent female residents using the Shanghai Resident Registry. Women who had a hysterectomy were not eligible. | —         | The diagnosis of each case was confirmed by medical chart review and a review of the available pathology slides by senior study pathologists | —                            | Occupational sedentary | Occupations were classified into high, medium, or low levels of estimated sitting time and activity level using job codes based on self-reported jobs held for at least 3 years                                                                                                                                                                                                                                                                                                             |
| Friberg 2006  | Cohort members from mammography screening program, women diagnosed with cancer (other than nonmelanoma skin cancer) and those having had a hysterectomy before returning the follow-up questionnaire, and with missing information on physical activity were excluded.                                               | 1997-2005 | The Swedish Cancer Register and the Regional Cancer Register                                                                                 | —                            | Occupational sedentary | Duration of specific activities was asked and assigned mean metabolic equivalent (MET) values [multiples of MET (kcal kg <sup>-1</sup> h <sup>-1</sup> )] based on specific activities within corresponding categories in a physical activity compendium. Occupational activity: low: mostly sitting (1.3 MET/h), and sitting down more than half the time (1.8 MET/h); high: mostly standing (2.2 MET/h), doing lifts (2.6 MET/h), a lot of lifts (3.0 MET/h), and heavy labor (3.9 MET/h) |
|               |                                                                                                                                                                                                                                                                                                                      |           |                                                                                                                                              |                              | Recreational sedentary | For leisure time inactivity, there were five predefined categories for time spent per day watching TV/sitting (inactive leisure time, <1 hour daily to >6 hours)                                                                                                                                                                                                                                                                                                                            |

|              |                                                                                                                                                                                                                                                                                                                                |           |                                                                                                                                                             |                         |                        |                                                                                                                                                                                                                                                                                                                                          |
|--------------|--------------------------------------------------------------------------------------------------------------------------------------------------------------------------------------------------------------------------------------------------------------------------------------------------------------------------------|-----------|-------------------------------------------------------------------------------------------------------------------------------------------------------------|-------------------------|------------------------|------------------------------------------------------------------------------------------------------------------------------------------------------------------------------------------------------------------------------------------------------------------------------------------------------------------------------------------|
|              |                                                                                                                                                                                                                                                                                                                                |           |                                                                                                                                                             |                         |                        | daily, 1.2 MET/h)                                                                                                                                                                                                                                                                                                                        |
| Patel 2008   | Postmenopausal women in the American Cancer Society Cancer Prevention Study II (CPS-II) Nutrition Cohort, a large prospective study in the US, excluded women who reported prevalent cancer (except nonmelanoma skin cancer) or not being postmenopausal or who had a hysterectomy or unknown hysterectomy status at baseline. | 1997-2003 | Self-report on follow-up questionnaire and subsequently verified from medical records or linkage with state cancer registries, and the National Death Index | Endometrial carcinomas  | Recreational sedentary | Based on the question "During the past year, on an average day, (not counting time spent at your job) how many hours per day did you spend sitting (watching TV, reading, etc.)?" Responses included "none, less than 3, 3-5, 6-8, more than 8hr/day." Sedentary behavior at baseline was categorized as 0-<3, 3-5, ≥6 or missing hr/day |
| Gierach 2009 | Female members of the AARP (the American Association of Retired Persons) and resided in US states.                                                                                                                                                                                                                             | 1995-2003 | State cancer registries, and histology was defined using ICD for Oncology codes, 3rd edition                                                                | Adenocarcinomas (95.0%) | Recreational sedentary | Information on physical inactivity was based on two questions. Participants were asked about time spent watching TV or videos during a typical 24-hour period over the past 12 months. Time spent watching TV or videos was categorized as none, <1 hour, 1-2, 3-4, 5-6,7-8, and ≥ 9 hours                                               |
|              |                                                                                                                                                                                                                                                                                                                                |           |                                                                                                                                                             |                         | Total sedentary        | In a separate question, participants were also asked to indicate the number of hours spent sitting during a typical 24-hour period over the past 12 months: <3,3-4, 5-6, 7-8, and ≥ 9 hours. Both measures of inactivity were collapsed as <3, 3-4, 5-6,and ≥ 7 hours per day                                                            |

|                   |                                                                                                                                                                                                                                                                                    |                 |                                                                                                                                   |   |                        |                                                                                                                                                                                                                                                                                                                                                                                     |
|-------------------|------------------------------------------------------------------------------------------------------------------------------------------------------------------------------------------------------------------------------------------------------------------------------------|-----------------|-----------------------------------------------------------------------------------------------------------------------------------|---|------------------------|-------------------------------------------------------------------------------------------------------------------------------------------------------------------------------------------------------------------------------------------------------------------------------------------------------------------------------------------------------------------------------------|
| Friedenreich 2010 | Cases were Alberta residents, English-speaking, able to complete interview and questionnaire, and did not have another previous cancer except nonmelanoma skin cancer. Controls were identified using random-digit dialing and frequency matched to cases on age ( $\pm 5$ years). | —               | Incident, histologically confirmed invasive cases of endometrial cancer were identified directly from the Alberta Cancer Registry | — | Occupational sedentary | Lifetime occupational sedentary activity was estimated using a validated questionnaire. The patterns of physical activity were recorded by the interviewer including the age started, age ended, number of months per year, weeks per month, days per week and hours per day that each activity was performed so that the frequency and duration of these activities is determined. |
| Arem 2011         | English-speaking, Connecticut residents diagnosed with primary endometrial cancer. Population-based controls were identified using random-digit dialing (RDD) and were frequency matched on age.                                                                                   | —               | —                                                                                                                                 | — | Total sedentary        | Time seated watching multimedia or sitting at work was calculated as hours per week from self-report in the two to five years before interview                                                                                                                                                                                                                                      |
| Hunter 2020       | Participants of UK Biobank cohort without been diagnosed with malignant cancer (excluding non-melanoma skin cancer), and have completed self-report screen time assessment.                                                                                                        | 7.6 (1.4) years | Uterus cancer identified from national cancer registries (ICD-10: C54; ICD-9: 182)                                                | — | Recreational sedentary | Television (TV) viewing time: "In a typical DAY, how many hours do you spend watching TV?"<br>Daily recreational computer use time: "In a typical DAY, how many hours do you spend using the computer? (Do not include using a computer at work)."<br>Daily total recreational screen time: self-reported time spent watching TV, and time spent using the computer outside of work |
| Miyata 2021       | Japanese inhabitants participated in municipal health screening                                                                                                                                                                                                                    | 14.8 years      | Cancer registries or local major                                                                                                  | — | Recreational sedentary | Television (TV) viewing (< 1, 1 to < 2, 2 to < 3, 3 to < 4, $\geq 4$ hr/day)                                                                                                                                                                                                                                                                                                        |



|  |                                                                                                      |  |                                                     |  |                        |                                                                                                                      |
|--|------------------------------------------------------------------------------------------------------|--|-----------------------------------------------------|--|------------------------|----------------------------------------------------------------------------------------------------------------------|
|  | examinations with completed questionnaires and no history of cancer or uterine surgery at enrolment. |  | hospital records coded according to the ICD-10: C54 |  | Occupational sedentary | Occupational activity was classified according to the position during work (mainly sitting, mainly standing, moving) |
|--|------------------------------------------------------------------------------------------------------|--|-----------------------------------------------------|--|------------------------|----------------------------------------------------------------------------------------------------------------------|

Note: Table values are mean (SD) for continuous variables; ICD, International Classification of Disease; \* studies not included in the meta-analysis.

**Table S4.** Detailed data underlying the meta-analysis.

Table S4-1. Detailed data for overall sedentary behaviour and endometrial cancer underlying the meta-analysis.

| Author       | Year | Domain                     | Study design       | Study area    | Sample size | Number of cases | RR (95%CI)        | Adjustment of confounding factors | Study quality | Adjustment for physical activity | Adjustment for BMI |
|--------------|------|----------------------------|--------------------|---------------|-------------|-----------------|-------------------|-----------------------------------|---------------|----------------------------------|--------------------|
| Gierach      | 2009 | Total                      | Cohort study       | North America | ≥ 5000      | ≥ 500           | 1.56 (1.22, 1.99) | Not adequate                      | Good          | No                               | No                 |
| Arem         | 2011 | Total                      | Case-control study | North America | ≥ 5000      | ≥ 500           | 1.52 (1.07, 2.16) | Adequate                          | Fair          | No                               | Yes                |
| Dosemeci     | 1993 | Occupational&/Leisure-time | Case-control study | Asia          | < 5000      | < 500           | 0.50 (0.10, 4.40) | Not adequate                      | Fair          | No                               | No                 |
| Shu          | 1993 | Occupational&/Leisure-time | Case-control study | Asia          | < 5000      | < 500           | 1.20 (0.70, 2.00) | Not adequate                      | Fair          | No                               | yes                |
| Olson        | 1997 | Occupational&/Leisure-time | Case-control study | North America | < 5000      | < 500           | 0.93 (0.55, 1.56) | Adequate                          | Good          | No                               | Yes                |
| Moradi       | 2000 | Occupational&/Leisure-time | Case-control study | Europe        | < 5000      | ≥ 500           | 1.32 (1.08, 1.60) | Not adequate                      | Good          | No                               | Yes                |
| Weiderpass   | 2001 | Occupational&/Leisure-time | Cohort study       | Europe        | ≥ 5000      | ≥ 500           | 1.30 (1.10, 1.50) | Not adequate                      | Fair          | No                               | No                 |
| Furberg      | 2003 | Occupational&/Leisure-time | Cohort study       | Europe        | ≥ 5000      | < 500           | 1.48 (0.97, 2.20) | Adequate                          | Good          | Yes                              | Yes                |
| Matthews     | 2005 | Occupational&/Leisure-time | Case-control study | Asia          | < 5000      | ≥ 500           | 0.93 (0.67, 1.30) | Not adequate                      | Fair          | No                               | Yes                |
| Friedenreich | 2010 | Occupational&/Leisure-time | Case-control study | North America | < 5000      | ≥ 500           | 1.28 (0.89, 1.83) | Not adequate                      | Fair          | No                               | Yes                |
| Miyata       | 2021 | Occupational&/Leisure-time | Cohort study       | Asia          | ≥ 5000      | < 500           | 2.15 (1.13, 4.09) | Adequate                          | Good          | Yes                              | Yes                |
| Friberg      | 2006 | Occupational&/Leisure-time | Cohort study       | Europe        | ≥ 5000      | < 500           | 1.22 (0.95, 1.57) | Not adequate                      | Good          | Yes                              | No                 |
| Patel        | 2008 | Occupational&/Leisure-time | Cohort study       | North America | ≥ 5000      | < 500           | 1.40 (1.03, 1.89) | Adequate                          | Good          | No                               | No                 |
| Hunter       | 2020 | Occupational&/Leisure-time | Cohort study       | Europe        | ≥ 5000      | ≥ 500           | 0.57 (0.31, 1.03) | Not adequate                      | Fair          | No                               | Yes                |

Table S4-2. Detailed data for occupational sedentary behaviour and endometrial cancer underlying the meta-analysis.

| Author       | Year | Study design       | Study area    | Sample size | Number of cases | RR (95%CI)        | Adjustment of confounding factors | Study quality | Adjustment for physical activity | Adjustment for BMI | Additional adjustment for BMI |
|--------------|------|--------------------|---------------|-------------|-----------------|-------------------|-----------------------------------|---------------|----------------------------------|--------------------|-------------------------------|
| Dosemeci     | 1993 | Case-control study | Asia          | < 5000      | < 500           | 0.50 (0.10, 4.40) | Not adequate                      | Fair          | No                               | No                 |                               |
| Shu          | 1993 | Case-control study | Asia          | < 5000      | < 500           | 1.20 (0.70, 2.00) | Not adequate                      | Fair          | No                               | Yes                |                               |
| Olson        | 1997 | Case-control study | North America | < 5000      | < 500           | 0.93 (0.55, 1.56) | Adequate                          | Good          | No                               | Yes                |                               |
| Moradi       | 2000 | Case-control study | Europe        | < 5000      | ≥ 500           | 1.32 (1.08, 1.60) | Not adequate                      | Good          | No                               | Yes                |                               |
| Weiderpass   | 2001 | Cohort study       | Europe        | ≥ 5000      | ≥ 500           | 1.30 (1.10, 1.50) | Not adequate                      | Fair          | No                               | No                 |                               |
| Furberg      | 2003 | Cohort study       | Europe        | ≥ 5000      | < 500           | 1.64 (0.95, 2.84) | Adequate                          | Good          | Yes                              | Yes                |                               |
| Matthews     | 2005 | Case-control study | Asia          | < 5000      | ≥ 500           | 0.93 (0.67, 1.30) | Not adequate                      | Fair          | No                               | Yes                |                               |
| Friberg      | 2006 | Cohort study       | Europe        | ≥ 5000      | < 500           | 1.03 (0.76, 1.39) | Not adequate                      | Good          | Yes                              | No                 | 0.99 (0.73, 1.34)             |
| Friedenreich | 2010 | Case-control study | North America | < 5000      | ≥ 500           | 1.28 (0.89, 1.83) | Not adequate                      | Fair          | No                               | Yes                |                               |
| Miyata       | 2021 | Cohort study       | Asia          | ≥ 5000      | < 500           | 2.17 (1.04, 4.56) | Adequate                          | Good          | Yes                              | Yes                |                               |

Table 4-3. Detailed data for leisure-time sedentary behaviour and endometrial cancer underlying the meta-analysis.

| Author  | Year | Study design | Study area    | Sample size | Number of cases | RR (95%CI)        | Adjustment of confounding factors | Study quality | Adjustment for physical activity | Adjustment for BMI | Additional adjustment for BMI |
|---------|------|--------------|---------------|-------------|-----------------|-------------------|-----------------------------------|---------------|----------------------------------|--------------------|-------------------------------|
| Furberg | 2003 | Cohort study | Europe        | ≥ 5000      | < 500           | 1.27 (0.69, 2.32) | Adequate                          | Good          | Yes                              | Yes                |                               |
| Friberg | 2006 | Cohort study | Europe        | ≥ 5000      | < 500           | 1.80 (1.14, 2.83) | Not adequate                      | Good          | Yes                              | No                 | 1.66 (1.05, 2.61)             |
| Patel   | 2008 | Cohort study | North America | ≥ 5000      | < 500           | 1.40 (1.03, 1.89) | Adequate                          | Good          | No                               | No                 | 1.18 (0.87, 1.59)             |
| Gierach | 2009 | Cohort study | North America | ≥ 5000      | ≥ 500           | 1.66 (1.20, 2.88) | Not adequate                      | Good          | No                               | No                 | 1.21 (0.87, 1.67)             |
| Hunter  | 2020 | Cohort study | Europe        | ≥ 5000      | ≥ 500           | 0.57 (0.31, 1.03) | Not adequate                      | Fair          | No                               | Yes                |                               |
| Miyata  | 2021 | Cohort study | Asia          | ≥ 5000      | < 500           | 2.10 (0.57, 7.71) | Adequate                          | Good          | Yes                              | Yes                |                               |

**Table S5.** Newcastle-Ottawa quality assessment scale for cohort study.

| Source                 | Selection                                |                                     |                           |                                                                          | Comparability                                                   |                       | Outcome                                         |                                  | Total Stars |
|------------------------|------------------------------------------|-------------------------------------|---------------------------|--------------------------------------------------------------------------|-----------------------------------------------------------------|-----------------------|-------------------------------------------------|----------------------------------|-------------|
|                        | Representativeness of the Exposed Cohort | Selection of the Non-Exposed Cohort | Ascertainment of Exposure | Demonstration That Outcome of Interest Was Not Present at Start of Study | Comparability of Cohorts on the Basis of the Design or Analysis | Assessment of Outcome | Was Follow-Up Long Enough for Outcomes to Occur | Adequacy of Follow Up of Cohorts |             |
| <b>Hunter 2020</b>     | 1                                        | 1                                   | -                         | 1                                                                        | 1                                                               | 1                     | 1                                               | -                                | 6           |
| <b>Miyata 2021</b>     | 1                                        | 1                                   | -                         | 1                                                                        | 2                                                               | 1                     | 1                                               | 1                                | 8           |
| <b>Gierach 2009</b>    | 1                                        | 1                                   | -                         | 1                                                                        | 1                                                               | 1                     | 1                                               | 1                                | 7           |
| <b>Patel 2008</b>      | 1                                        | 1                                   | -                         | 1                                                                        | 1                                                               | 1                     | 1                                               | 1                                | 7           |
| <b>Friberg 2006</b>    | 1                                        | 1                                   | -                         | 1                                                                        | 2                                                               | 1                     | 1                                               | 1                                | 8           |
| <b>Furberg 2003</b>    | 1                                        | 1                                   | 1                         | 1                                                                        | 2                                                               | 1                     | 1                                               | 1                                | 9           |
| <b>Weiderpass 2001</b> | 1                                        | 1                                   | 1                         | -                                                                        | -                                                               | 1                     | 1                                               | -                                | 5           |

Note: A study can be awarded a maximum of one star for each numbered item within the Selection and Outcome categories. A maximum of two stars can be given for Comparability. For comparability in our analysis, a study can be awarded one star for controlling for age; Two stars for also controlling for physical activity.

**Table S6.** Newcastle-Ottawa quality assessment scale for case-control study.

| Source                   | Selection                        |                                 |                       | Comparability          |                                                                            |                           | Exposure                                            |                   | Total Stars |
|--------------------------|----------------------------------|---------------------------------|-----------------------|------------------------|----------------------------------------------------------------------------|---------------------------|-----------------------------------------------------|-------------------|-------------|
|                          | Is the Case Definition Adequate? | Representativeness of the Cases | Selection of Controls | Definition of Controls | Comparability of Cases and Controls on the Basis of the Design or Analysis | Ascertainment of Exposure | Same Method of Ascertainment for Cases and Controls | Non-Response Rate |             |
| <b>Arem 2011</b>         | 1                                | 1                               | 1                     | -                      | 1                                                                          | -                         | 1                                                   | -                 | 5           |
| <b>Friedenreich 2010</b> | 1                                | 1                               | 1                     | 1                      | 1                                                                          | -                         | 1                                                   | -                 | 6           |
| <b>Matthews 2005</b>     | 1                                | 1                               | 1                     | -                      | 1                                                                          | -                         | 1                                                   | -                 | 5           |
| <b>Moradi 2000</b>       | 1                                | 1                               | 1                     | 1                      | 1                                                                          | 1                         | 1                                                   | -                 | 7           |
| <b>Olson 1997</b>        | 1                                | 1                               | 1                     | 1                      | 1                                                                          | -                         | 1                                                   | 1                 | 7           |
| <b>Shu 1993</b>          | 1                                | 1                               | 1                     | -                      | 1                                                                          | -                         | 1                                                   | -                 | 5           |
| <b>Dosemeci 1993</b>     | -                                | 1                               | -                     | 1                      | 1                                                                          | 1                         | 1                                                   | 1                 | 6           |

Note: A study can be awarded a maximum of one star for each numbered item within the Selection and Exposure categories. A maximum of two stars can be given for Comparability. For comparability in our analysis, a study can be awarded one star for controlling for age; Two stars for also controlling for physical activity.

**Table S7.** Adjusted confounders of the included studies in systematic review.

| Publication  |      | Number of confounders | Adjusted confounders                                                                                                                                                                                                              | How to deal with obesity/BMI (particular attention to potential mediator BMI) |
|--------------|------|-----------------------|-----------------------------------------------------------------------------------------------------------------------------------------------------------------------------------------------------------------------------------|-------------------------------------------------------------------------------|
| Author       | Year |                       |                                                                                                                                                                                                                                   |                                                                               |
| Dosemeci     | 1993 | 3                     | Age, smoking and socioeconomic status (based on income and education levels)                                                                                                                                                      | —                                                                             |
| Shu          | 1993 | 4                     | Age, number of pregnancies, BMI, caloric intake                                                                                                                                                                                   | Adjusted in the multivariate model                                            |
| Zheng*       | 1993 | —                     | Age-specific and sex specific person-years estimated in each occupation category                                                                                                                                                  | —                                                                             |
| Olson        | 1997 | 9                     | Age, education, BMI, diabetes, smoking, parity, age at menarche, menopausal status, and use of unopposed estrogen.                                                                                                                | Adjusted in the multivariate model                                            |
| Moradi*      | 1998 | 4                     | Age at follow-up, place of residence, calendar year of follow-up, and socio-economic status                                                                                                                                       | —                                                                             |
| Moradi       | 2000 | 8                     | Age, parity, age at last birth, BMI 1 year prior to data collection, use of oral contraceptives, use of hormone replacement therapy, smoking, and age at menopause                                                                | Adjusted in the multivariate model                                            |
| Weiderpass   | 2001 | 3                     | Mean number of children, mean age at first birth, and turnover rate                                                                                                                                                               | —                                                                             |
| Furberg      | 2003 | 9                     | age, geographical region, height, BMI, recreational or occupational activity and smoking at baseline and parity. Also considered blood pressure and serum glucose                                                                 | Adjusted in the multivariate model                                            |
| Matthews     | 2005 | 12                    | Age, age at menarche, menopausal status and age, number of pregnancies, oral contraceptive use, current smoking, ever drinking, family history of cancer, education, height, and BMI                                              | Adjusted in the multivariate model                                            |
| Friberg      | 2006 | 9                     | Age in months, parity, history of diabetes, total fruit and vegetable, education, and work/occupation, walking/bicycling, household work, leisure time activity, and leisure time inactivity (watching TV/sitting) simultaneously | Additionally adjusted for BMI                                                 |
| Patel        | 2008 | 9                     | Age, age at menarche, age at menopause, duration of oral contraceptive use, parity, smoking, total caloric intake, personal history of diabetes and postmenopausal hormone therapy use                                            | Additionally adjusted for BMI                                                 |
| Gierach      | 2009 | 7                     | Age, race, smoking status, parity, ever use of oral contraceptives, age at menopause, hormone therapy formulation                                                                                                                 | Additionally adjusted for BMI                                                 |
| Friedenreich | 2010 | 6                     | Age, BMI, waist circumference, age at menarche, hypertension, and number of pregnancies of $\geq 20$ weeks gestation                                                                                                              | Adjusted in the multivariate model                                            |

|                     |      |    |                                                                                                                                                                                                                                                          |                                    |
|---------------------|------|----|----------------------------------------------------------------------------------------------------------------------------------------------------------------------------------------------------------------------------------------------------------|------------------------------------|
| Arem                | 2011 | 8  | Age, BMI, race, number of live births, menopausal status, oral contraceptive use, hypertension, and smoking status                                                                                                                                       | Adjusted in the multivariate model |
| Hunter              | 2020 | 15 | Age, sex, ethnicity, deprivation index, education, fruit and vegetable intake, BMI, smoking status, and alcohol intake, hormone therapy use, oral contraceptive use, number of live births, age at menarche, age at menopause, hysterectomy status       | Adjusted in the multivariate model |
| Miyata <sup>7</sup> | 2021 | 13 | Age, BMI, weight change since age 20, history of diabetes, history of hypertension, age at menarche, menstrual presence, parity, smoking status, alcohol consumption, occupational activity, hours of physical exercise, walking, and television viewing | Adjusted in the multivariate model |

---

Note: BMI, body mass index. \* studies not included in the meta-analysis.



**Table S8.** Influence analysis of sedentary behaviour and endometrial cancer (given named study is omitted).

| Occupational domain |                   | Leisure-time domain |                   |
|---------------------|-------------------|---------------------|-------------------|
| Study omitted       | Estimate (95% CI) | Study omitted       | Estimate (95% CI) |
| Dosemeci 1993       | 1.23 (1.10, 1.38) | Furberg 2003        | 1.35 (0.93-1.95)  |
| Shu 1993            | 1.22 (1.08, 1.38) | Friberg 2006        | 1.24 (0.86-1.79)  |
| Olson 1997          | 1.24 (1.11, 1.39) | Patel 2008          | 1.31 (0.85-2.03)  |
| Moradi 2000         | 1.19 (1.04, 1.37) | Gierach 2009        | 1.26 (0.86-1.86)  |
| Weiderpass 2001     | 1.19 (1.03, 1.38) | Hunter 2020         | 1.53 (1.24-1.87)  |
| Furberg 2003        | 1.21 (1.08, 1.36) | Miyata 2021         | 1.30 (0.93-1.82)  |
| Matthews 2005       | 1.27 (1.15, 1.40) | Combined            | 1.34 (0.98-1.83)  |
| Friberg 2006        | 1.26 (1.12, 1.41) |                     |                   |
| Friedenreich 2010   | 1.21 (1.06, 1.38) |                     |                   |
| Miyata 2021         | 1.22 (1.11, 1.35) |                     |                   |
| Combined            | 1.22 (1.09, 1.37) |                     |                   |

**Table S9.** Results of meta-regression analyses on individual study characteristics for studies included in the meta-analysis of the association between sedentary behaviour and the risk of endometrial cancer.

| Covariates                        | N  | RR   | 95% CI    | I <sup>2</sup> | Tau <sup>2</sup> | Ratio of RR | 95% CI    | P    |
|-----------------------------------|----|------|-----------|----------------|------------------|-------------|-----------|------|
| Model with no covariates          | 14 | 1.28 | 1.14 1.43 | 34.8%          | 0.0000           | -           | - -       | -    |
| Domain*                           |    |      |           |                |                  |             |           |      |
| Total                             | 2  | 1.55 | 1.27 1.89 | 29.3%          | 0.0004           | 1.00        | Reference |      |
| Occupational                      | 10 | 1.22 | 1.09 1.37 |                |                  | 0.80        | 0.60 1.07 | 0.12 |
| Leisure-time                      | 6  | 1.34 | 0.98 1.83 |                |                  | 0.89        | 0.62 1.28 | 0.51 |
| Study design                      |    |      |           |                |                  |             |           |      |
| Cohort study                      | 7  | 1.33 | 1.13 1.58 | 36.8%          | 0.0027           | 1.00        | Reference |      |
| Case-control study                | 7  | 1.22 | 1.05 1.41 |                |                  | 0.91        | 0.72 1.17 | 0.44 |
| Study area                        |    |      |           |                |                  |             |           |      |
| Asia                              | 4  | 1.20 | 0.78 1.83 | 36.0%          | 0.0000           | 1.00        | Reference |      |
| Europe                            | 5  | 1.24 | 1.05 1.46 |                |                  | 1.14        | 0.78 1.68 | 0.47 |
| North America                     | 5  | 1.41 | 1.22 1.63 |                |                  | 1.26        | 0.84 1.91 | 0.24 |
| Sample size                       |    |      |           |                |                  |             |           |      |
| < 5000                            | 6  | 1.19 | 1.03 1.37 | 32.7%          | 0.0028           | 1.00        | Reference |      |
| ≥ 5000                            | 8  | 1.35 | 1.17 1.57 |                |                  | 1.15        | 0.90 1.47 | 0.24 |
| Number of cases                   |    |      |           |                |                  |             |           |      |
| < 500                             | 7  | 1.30 | 1.12 1.51 | 39.8%          | 0.0036           | 1.00        | Reference |      |
| ≥ 500                             | 7  | 1.25 | 1.06 1.47 |                |                  | 0.99        | 0.75 1.29 | 0.91 |
| Study quality                     |    |      | 1.47      |                |                  |             |           |      |
| Fair                              | 7  | 1.14 | 0.93 1.41 | 33.4%          | 0.0049           | 1.00        | Reference |      |
| Good                              | 7  | 1.37 | 1.22 1.53 |                |                  | 1.14        | 0.90 1.46 | 0.25 |
| Adjustment of confounding factors |    |      |           |                |                  |             |           |      |
| Not adequate                      | 9  | 1.22 | 1.07 1.40 | 35.4%          | 0.0014           | 1.00        | Reference |      |
| Adequate                          | 5  | 1.42 | 1.18 1.72 |                |                  | 1.13        | 0.85 1.50 | 0.36 |
| Adjustment for physical activity  |    |      |           |                |                  |             |           |      |
| No                                | 11 | 1.25 | 1.10 1.42 | 39.1%          | 0.0094           | 1.00        | Reference |      |
| Yes                               | 3  | 1.41 | 1.08 1.84 |                |                  | 1.10        | 0.78 1.55 | 0.55 |
| Adjustment for BMI                |    |      |           |                |                  |             |           |      |
| No                                | 5  | 1.34 | 1.20 1.49 | 37.0%          | 0.0029           | 1.00        | Reference |      |
| Yes                               | 9  | 1.21 | 1.01 1.46 |                |                  | 0.92        | 0.72 1.17 | 0.46 |

Meta-regression models are fitted assuming random effects that allow for between-study variability. I-squared (%) representing variation due to heterogeneity; Tau-squared representing estimate of between-study variance.

\*Number of studies exceeds in total as some research presented risk estimates separately for total sedentary, occupational, leisure-time domain.
