# Supplementary material for: Association between domain-specific sedentary behaviour and endometrial cancer: a systematic review and meta-analysis
Source: PubMed Central journal article supplement — BMJ Open. 2023 Jun 6;13(6):e069042. doi: 10.1136/bmjopen-2022-069042 (PMC10254909; doi:10.1136/bmjopen-2022-069042), 2023-06-06
Supplement: bmjopen-2022-069042supp003.pdf [file bmjopen-2022-069042supp003.pdf]

**MOOSE reporting checklist for meta-analyses of observational studies.**

| <b>Reporting section and item</b>   |                                                                                                                                                                                                                                                                              | <b>Reported on page</b>             |
|-------------------------------------|------------------------------------------------------------------------------------------------------------------------------------------------------------------------------------------------------------------------------------------------------------------------------|-------------------------------------|
| <b>Reporting of background</b>      |                                                                                                                                                                                                                                                                              |                                     |
| 1                                   | Problem definition                                                                                                                                                                                                                                                           | 5-6                                 |
| 2                                   | Hypothesis statement                                                                                                                                                                                                                                                         | 6-7                                 |
| 3                                   | Description of study outcome(s)                                                                                                                                                                                                                                              | 7                                   |
| 4                                   | Type of exposure or intervention used                                                                                                                                                                                                                                        | 7                                   |
| 5                                   | Type of study designs used                                                                                                                                                                                                                                                   | 7                                   |
| 6                                   | Study population                                                                                                                                                                                                                                                             | 7                                   |
| <b>Reporting of search strategy</b> |                                                                                                                                                                                                                                                                              |                                     |
| 1                                   | Qualifications of searchers (eg, librarians and investigators)                                                                                                                                                                                                               | 7-8                                 |
| 2                                   | Search strategy, including time period included in the synthesis and keywords                                                                                                                                                                                                | 7-8,<br>Supplementary Text          |
| 3                                   | Effort to include all available studies, including contact with authors                                                                                                                                                                                                      | 8                                   |
| 4                                   | Databases and registries searched                                                                                                                                                                                                                                            | 7                                   |
| 5                                   | Search software used, name and version, including special features used (eg, explosion)                                                                                                                                                                                      | 7                                   |
| 6                                   | Use of hand searching (eg, reference lists of obtained articles)                                                                                                                                                                                                             | 7-8                                 |
| 7                                   | List of citations located and those excluded, including justification                                                                                                                                                                                                        | Figure 1                            |
| 8                                   | Method of addressing articles published in languages other than in English                                                                                                                                                                                                   | 8                                   |
| 9                                   | Method of handing abstracts and unpublished studies                                                                                                                                                                                                                          | 8                                   |
| 10                                  | Description of any contact with authors                                                                                                                                                                                                                                      | 8-9                                 |
| <b>Reporting of methods</b>         |                                                                                                                                                                                                                                                                              |                                     |
| 1                                   | Description of relevance or appropriateness of studies assembled for assessing the hypothesis to be tested                                                                                                                                                                   | 8-9                                 |
| 2                                   | Rationale for the selection and coding of data (eg, sound clinical principles or convenience)                                                                                                                                                                                | 8-9                                 |
| 3                                   | Documentation of how data were classified and coded (eg, multiple raters, binding, and interrater reliability)                                                                                                                                                               | 9-12,<br>Supplementary material     |
| 4                                   | Assessment of confounding (eg, comparability of cases and controls in studies where appropriate)                                                                                                                                                                             | 9-10,<br>Supplementary material     |
| 5                                   | Assessment of study quality, including binding of quality assessors; stratification or regression on possible predictors of study results                                                                                                                                    | 9-10,<br>Supplementary material     |
| 6                                   | Assessment of heterogeneity                                                                                                                                                                                                                                                  | 10                                  |
| 7                                   | Description of statistical methods (eg, complete description of fixed or random effects models, justification of whether the chosen models account for predictors of study results, dose-response models, or cumulative meta-analyses) in sufficient detail to be replicated | 10-12                               |
| 8                                   | Provision of appropriate tables and graphics                                                                                                                                                                                                                                 | Figure 1,<br>Supplementary material |

| <b>Reporting of results</b>    |                                                                                                                           |                                   |
|--------------------------------|---------------------------------------------------------------------------------------------------------------------------|-----------------------------------|
| 1                              | Graphic summarizing individual study estimates and overall estimate                                                       | Figure 2, 4-5                     |
| 2                              | Table giving descriptive information for each study included                                                              | Table 1,<br>Supplemental material |
| 3                              | Results of sensitivity testing (eg, subgroup analysis)                                                                    | 16-19,<br>Supplemental material   |
| 4                              | Indication of statistical uncertainty of findings                                                                         | 16-19,<br>Supplemental material   |
| <b>Reporting of discussion</b> |                                                                                                                           |                                   |
| 1                              | Quantitative assessment of bias (eg, publication bias)                                                                    | 20-22, Figure 3                   |
| 2                              | Justification for exclusion (eg, exclusion for non-English-language citations)                                            | 20-24                             |
| 3                              | Assessment of quality of included studies                                                                                 | 20-22,<br>Supplemental material   |
| <b>Reporting of conclusion</b> |                                                                                                                           |                                   |
| 1                              | Consideration of alternative explanations for observed results                                                            | 24-25                             |
| 2                              | Generalization of the conclusions (ie, appropriate for the data presented and within the domain of the literature review) | 24-25                             |
| 3                              | Guideline for future research                                                                                             | 24-25                             |
| 4                              | Disclosure of funding source                                                                                              | 26                                |
